# Supplementary material
Source: publisher figshare collection journal article supplement (https://acs.figshare.com/ndownloader/files/8630296)
Supplement: Supplementary file 1 [file 8630296]

## Supporting Information

### **Chiral-at-Metal Rh(III) Complex-Catalyzed Asymmetric Conjugate Addition of Unactivated Alkenes with $\alpha,\beta$ -Unsaturated 2-Acyl Imidazoles**

Kuan Li, Qian Wan and Qiang Kang\*

<sup>a</sup> College of Chemistry, Fuzhou University, 350108, P. R. China.

<sup>b</sup> Key Laboratory of Coal to Ethylene Glycol and Its Related Technology, Fujian Institute of Research on the Structure of Matter ,Chinese Academy of Sciences, Fuzhou, 350002, P. R. China.

## Table of Contents

|            |                                                    |           |
|------------|----------------------------------------------------|-----------|
| <b>I</b>   | <b>General Information.....</b>                    | <b>3</b>  |
| <b>II</b>  | <b>Experimental Section.....</b>                   | <b>4</b>  |
| <b>III</b> | <b>References .....</b>                            | <b>28</b> |
| <b>IV</b>  | <b>Chiral HPLC analysis trace.....</b>             | <b>29</b> |
| <b>V</b>   | <b>NMR Spectra of Products .....</b>               | <b>50</b> |
| <b>VI</b>  | <b>Single Crystal X-Ray Diffraction of 3k.....</b> | <b>88</b> |
| <b>VII</b> | <b>CD Spectra of <math>\Lambda</math>-Rh3.....</b> | <b>90</b> |

## I General Information

All reactions were performed in Schlenk tubes under an atmosphere of argon using oven-dried glassware. Commercially obtained reagents were used without further purification, unless otherwise noted. Chloroform was distilled over  $P_2O_5$  and stored over 3 Å type molecular sieves. THF and toluene were distilled freshly before use over sodium and benzophenone. Acetonitrile (MeCN), Dichloromethane (DCM) and 1,2-dichloroethane (DCE) were distilled from  $CaH_2$ . Reactions were checked for completion by TLC analysis and plates were visualized with short-wave UV light (254 nm). The  $^1H$  and  $^{13}C$  NMR spectra were obtained in  $CDCl_3$  using a Bruker-BioSpin AVANCE III HD NMR spectrometer at 400 and 100 MHz, respectively. Chemical shifts are reported in parts per million ( $\delta$  value) calibrated against the residual solvent peak. Signal patterns are indicated as follows: s, singlet; d, doublet; t, triplet; q, quartet; m, multiplet. Coupling constants ( $J$ ) are given in hertz (Hz). HPLC analyses of the compounds were done using chiralcel IA-IF columns using hexane and isopropanol as eluent. The infrared spectra were recorded on a Bruker VERTEX 70 IR spectrometer as KBr pellets, with absorption reported in  $cm^{-1}$ . High-resolution mass spectra were recorded on a Bruker Impact II UHR TOF LC/MS Mass Spectrometry. CD spectra were recorded on a MOS-450 circular dichroism spectrometer (600-200 nm, 1 nm bandwidth, 50 nm/min scanning speed, accumulation of 3 scans).

## II Experimental Section

**$\Lambda$ -Rh** was prepared according to reported procedure.<sup>1</sup> Alkenes **2**<sup>2-3</sup> and  $\alpha,\beta$ -unsaturated 2-acyl imidazoles<sup>4</sup> was prepared according to reported procedure.

### 1. Synthesis of chiral catalysts $\Lambda$ -Rh3.

#### (i) Synthesis of Ligand L3.

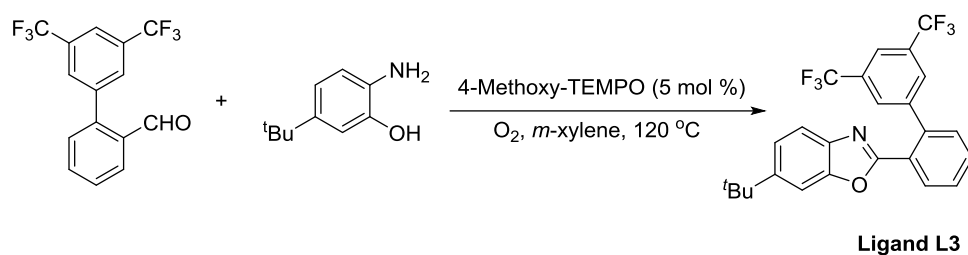

A solution of 2-amino-4-*tert*-butylphenol (0.825 g, 5.0 mmol) and 3',5'-bis(trifluoromethyl)-[1,1'-biphenyl]-2-carbaldehyde (1.59 g, 5.0 mmol) in *m*-xylene (16.0 mL) was stirred at 120 °C for 30 min. 4-Methoxy-TEMPO (46.5 mg, 5 mol %) was added to the mixture and the reaction was stirred at this temperature for further 8 h under oxygen atmosphere. Then the mixture was cooled to room temperature and concentrated under reduced pressure. The residue was purified by flash chromatography on silica gel (EtOAc/Petroleum ether = 1:20) to obtain the product (1.97 g, 85% yield) as a white solid.

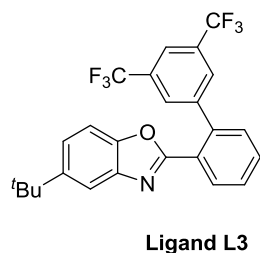

White solid, mp = 158-160 °C, <sup>1</sup>H NMR (400 MHz, CDCl<sub>3</sub>):  $\delta$  = 8.30-8.28 (m, 1H), 7.91 (s, 1H), 7.82 (s, 2H), 7.68 (d,  $J$  = 1.2 Hz, 1H), 7.63-7.57 (m, 2H), 7.45-7.43 (m, 1H), 7.37-7.34 (m, 1H), 7.22 (d,  $J$  = 8.4 Hz, 1H), 1.35 (s, 9H). <sup>13</sup>C NMR (CDCl<sub>3</sub>, 100 MHz):  $\delta$  = 162.2, 148.5, 148.3, 143.1, 141.4, 139.0, 131.3, 131.2, 131.1 (q,  $J$  = 33.2 Hz), 130.8, 129.6 (q,  $J$  = 2.7 Hz), 129.0, 126.2, 123.4 (q,  $J$  = 271.0 Hz), 123.3, 121.1 (q,  $J$  = 3.9 Hz), 116.7, 109.5, 34.9, 31.7. <sup>19</sup>F NMR (376.4 MHz, CDCl<sub>3</sub>):  $\delta$  = -62.8. IR (KBr):  $\nu$  (cm<sup>-1</sup>) 3026, 2962, 2870, 1581, 1549, 1481, 1463, 1394, 1380, 1366, 1334,

1275, 1179, 1162, 1131, 1115, 1045, 904, 774, 680. HRMS (ESI,  $m/z$ ) calcd for  $C_{25}H_{20}F_6NO$   $[M+H]^+$ : 464.1444, found: 464.1442.

**(ii) Synthesis of precursor rhodium complex (Dimer 3):**

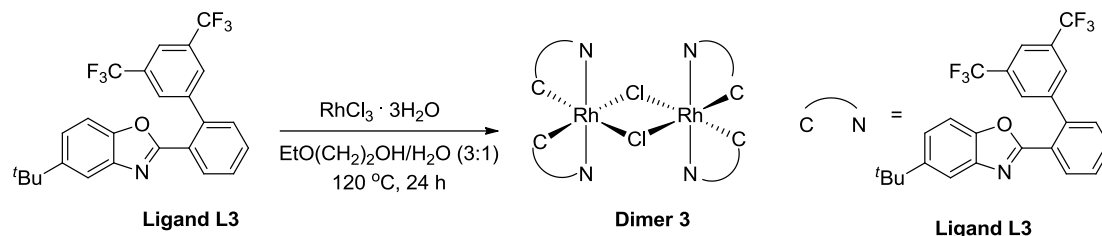

**Ligand L3** (1.9 g, 4.1 mmol) was added to  $\text{RhCl}_3 \cdot 3\text{H}_2\text{O}$  (418.5 mg, 2.0 mmol) in a mixture of 2-ethoxyethanol and water (3:1, 92 mL). The reaction mixture was heated at 120 °C for 24 h under  $\text{N}_2$  atmosphere. The resulting precipitate was collected by filtration, washed with methanol and dried to obtain the product **Dimer 3** (1.7 g, 81% yield).

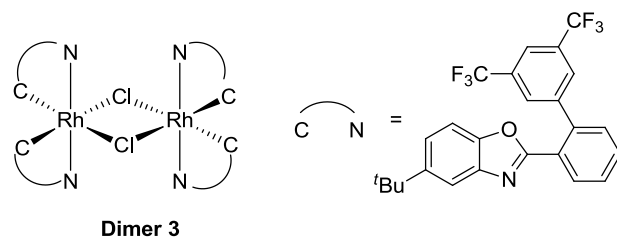

White solid.  $^1\text{H}$  NMR (400 MHz,  $\text{CDCl}_3$ ):  $\delta$  = 8.26 (s, 4H), 7.99 (s, 4H), 7.92 (s, 8H), 7.01 (d,  $J$  = 8.8 Hz, 4H), 6.91-6.85 (m, 8H), 6.78 (d,  $J$  = 8.8 Hz, 4H), 6.34 (d,  $J$  = 7.2 Hz, 4H), 0.88 (s, 36H).  $^{13}\text{C}$  NMR (100 MHz,  $\text{CDCl}_3$ ):  $\delta$  = 169.1, 169.0, 167.1, 166.8, 148.5, 147.0, 141.8, 138.3, 137.7, 133.8, 130.3, 127.2, 125.8, 124.2, 123.5 (q,  $J$  = 271.0 Hz), 121.2 (q,  $J$  = 4.1 Hz), 121.2 (q,  $J$  = 3.5 Hz), 115.2, 109.8, 34.7, 31.0.  $^{19}\text{F}$  NMR (376.4 MHz,  $\text{CDCl}_3$ )  $\delta$  = -62.5, -62.7. IR (KBr):  $\nu$  ( $\text{cm}^{-1}$ ) 2966, 2908, 2871, 1619, 1606, 1566, 1516, 1483, 1468, 1444, 1414, 1395, 1377, 1355, 1281, 1252, 1178, 1136, 1106, 1057, 933, 900, 846, 806, 710, 682. HRMS (ESI,  $m/z$ ) calcd for  $\text{C}_{100}\text{H}_{72}\text{ClF}_{24}\text{N}_4\text{O}_4\text{Rh}_2$ : 2090.3042, found: 2090.2991.

**(iii) Synthesis of rhodium Auxiliary Complexes  $\Lambda$ -(S)-3.**

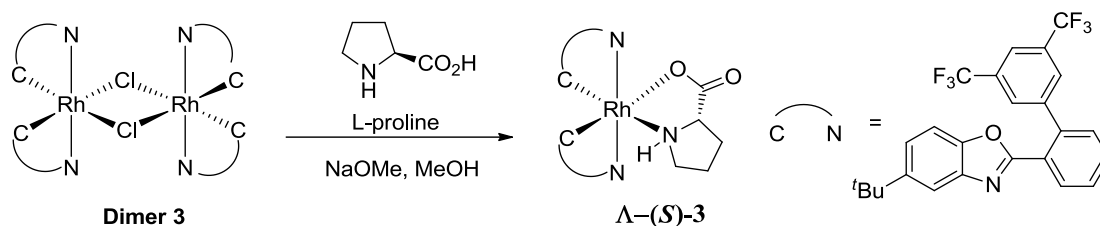

To a solution of NaOMe (230 mg, 2.0 mmol) in methanol (120 mL), L-proline (108 mg, 2.0 mmol) was added in one portion. The mixture was stirred for 10 min, to which a suspension of rhodium dimer (2.08 g, 1.0 mmol) was added. The mixture was stirred and heated at 50 °C for 12 h. After the mixture cooled to room temperature, CH<sub>2</sub>Cl<sub>2</sub> (16.0 mL) was added. The reaction mixture was stirred for a further 12 h. The solvent was removed *in vacuo*. The residue was purified by flash chromatography on silica gel (EtOAc/DCM = 1:5) to obtain the product **Λ-(S)-3** (752 mg, 33%).

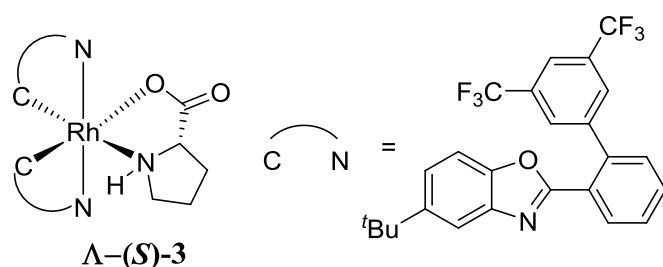

Yellow solid.  $[\alpha]_D^{25} = +123.9$  ( $c = 1.0$ , CHCl<sub>3</sub>) <sup>1</sup>H NMR (400 MHz, CDCl<sub>3</sub>):  $\delta = 8.18$  (d,  $J = 1.2$  Hz, 1H), 8.05 (s, 1H), 7.97 (d,  $J = 16.4$  Hz, 5H), 7.55-7.52 (m, 2H), 7.33 (t,  $J = 8.4$  Hz, 2H), 7.28 (d,  $J = 1.2$  Hz, 1H), 7.04-6.90 (m, 4H), 6.84 (d,  $J = 7.2$  Hz, 1H), 6.47 (d,  $J = 7.6$  Hz, 1H), 4.29-4.24 (m, 1H), 4.07-4.01 (m, 1H), 2.86-2.81 (m, 1H), 2.26-2.21 (m, 2H), 2.09-1.99 (m, 1H), 1.75-1.70 (m, 1H), 1.61-1.49 (m, 1H), 1.40 (s, 9H), 1.38 (s, 9H). <sup>13</sup>C NMR (100 MHz, CDCl<sub>3</sub>):  $\delta = 180.6, 171.5, 171.4, 169.9, 169.9, 169.1, 168.8, 168.5, 168.1, 151.5, 150.4, 147.9, 147.9, 142.0, 141.6, 138.7, 138.6, 137.5, 137.1, 135.3, 134.2, 131.3$  (q,  $J = 33.1$  Hz), 131.0 (q,  $J = 32.5$  Hz), 130.5, 130.4, 129.8, 129.8, 127.7, 127.5, 125.9, 125.4, 124.3, 124.2, 123.5 (q,  $J = 271.1$  Hz), 123.4 (q,  $J = 271.1$  Hz), 121.6 (q,  $J = 3.4$  Hz), 121.6 (q,  $J = 4.3$  Hz), 121.2 (q,  $J = 4.3$  Hz), 121.2 (q,  $J = 3.1$  Hz), 115.3, 111.7, 110.6, 110.5, 63.9, 49.4, 35.4, 35.2, 31.7, 31.7, 29.7, 26.9. <sup>19</sup>F NMR (376.4 MHz, CDCl<sub>3</sub>)  $\delta = -62.7$ . IR (KBr):  $\nu$  (cm<sup>-1</sup>) 1618,

1571, 1560, 1507, 1376, 1363, 1278, 1135, 1057, 709, 682. HRMS (ESI,  $m/z$ ) calcd for  $C_{55}H_{45}F_{12}N_3O_4Rh[M+H]^+$ : 1142.2222, found: 1142.2254.

#### (iv) Synthesis of Rhodium Catalysts $\Lambda$ -Rh3.

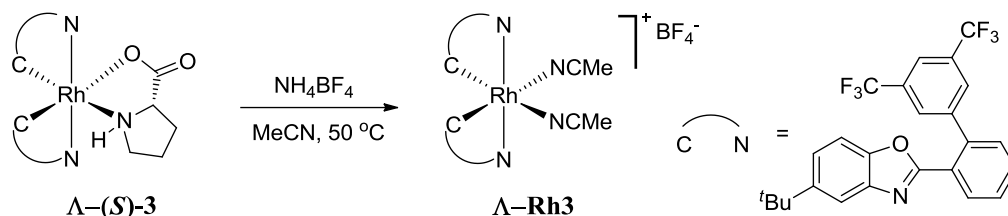

A suspension of the rhodium auxiliary complex  $\Lambda$ -(S)-3 (239.0 mg, 0.28 mmol) and  $\text{NH}_4\text{BF}_4$  (293.6 mg, 2.80 mmol) in acetonitrile (56.0 mL) was heated at 50 °C for 24 h under nitrogen in the dark. Then removed the solvent under reduced pressure and subjected to flash silica gel chromatography (100%  $\text{CH}_2\text{Cl}_2$  to  $\text{CH}_2\text{Cl}_2/\text{CH}_3\text{CN} = 10:1$ ) to give the enantiopure catalyst  $\Lambda$ -Rh3 (127.2 mg, 0.106 mmol, 38%) as a pale yellow solid.

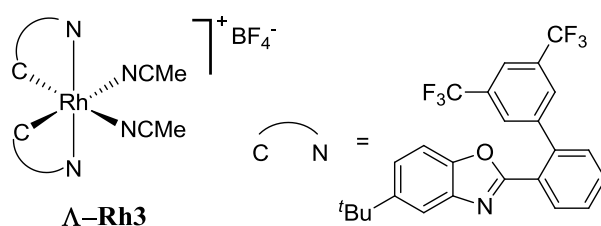

Pale yellow solid.  $^1\text{H}$  NMR (400 MHz,  $\text{CDCl}_3$ ):  $\delta$  = 8.09-7.90 (m, 8H), 7.63 (d,  $J$  = 8.8 Hz, 2H), 7.39 (d,  $J$  = 8.8 Hz, 2H), 7.16-6.90 (m, 4H), 6.44 (d,  $J$  = 7.6 Hz, 2H), 2.40 (d,  $J$  = 9.6 Hz, 6H), 1.44 (d,  $J$  = 9.2 Hz, 18H).  $^{13}\text{C}$  NMR (100 MHz,  $\text{CDCl}_3$ ):  $\delta$  = 167.9, 167.9, 160.8, 160.4, 149.6, 145.8, 139.2, 136.8, 135.0, 131.1, 129.7 (q,  $J$  = 33.2 Hz), 129.4, 129.4, 128.0, 125.4, 124.9, 123.5, 122.9 (q,  $J$  = 271.2 Hz), 120.5 (q,  $J$  = 3.4 Hz), 120.2 (q,  $J$  = 3.6 Hz), 119.9 (q,  $J$  = 4.0 Hz), 111.4, 109.4, 33.5, 29.6, 1.4.  $^{19}\text{F}$  NMR (376.4 MHz,  $\text{CDCl}_3$ )  $\delta$  = -62.7, -62.7. IR (KBr):  $\nu$  ( $\text{cm}^{-1}$ ) 3056, 2965, 2289, 1620, 1578, 1517, 1378, 1280, 1180, 1135, 1107, 847, 709. HRMS (ESI,  $m/z$ ) calcd for  $C_{54}H_{42}F_{12}N_4O_2Rh[M]^+$ : 1109.2166, found: 1109.2158. CD (MeOH):  $\lambda$ , nm ( $\Delta\epsilon$ ,  $\text{M}^{-1}\text{cm}^{-1}$ ) 402 (-25), 359 (+54), 301 (-54), 254 (+44).

## 2. Synthesis of substrates

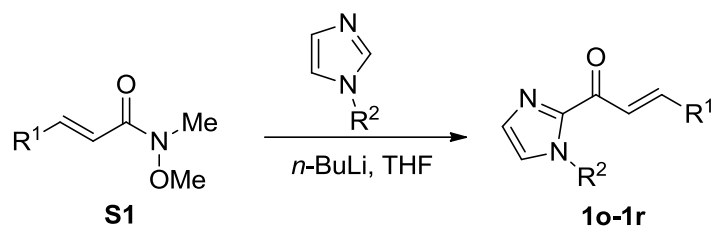

To a solution of *N*-methylimidazole (2.4 mL, 21.4 mmol) or *N*-isopropylimidazole (21.4 mmol) in THF (44.0 mL) at  $-78\text{ }^{\circ}\text{C}$  was added  $n\text{-BuLi}$  (8.6 mL, 2.5 M in hexane, 21.4 mmol) drop wise. The reaction was stirred at  $-78\text{ }^{\circ}\text{C}$  for 10 min, then stirred at room temperature for 1 h. The Weinreb amide **S1** (2.3 g, 17.8 mmol) was added to the flask after the reaction was cooled back down to  $-78\text{ }^{\circ}\text{C}$ . The reaction was allowed to warm to room temperature slowly (over a period of 3-4 h) and stirred overnight. The reaction was quenched with saturated aqueous solution of  $\text{Na}_2\text{CO}_3$  and extracted with EtOAc ( $3 \times 50\text{ mL}$ ). The combined organic layers were dried over anhydrous  $\text{Na}_2\text{SO}_4$ , filtered, and concentrated under reduced pressure. The residue was purified by flash chromatography on silica gel (EtOAc/Petroleum ether = 1:3) to produce **1**.

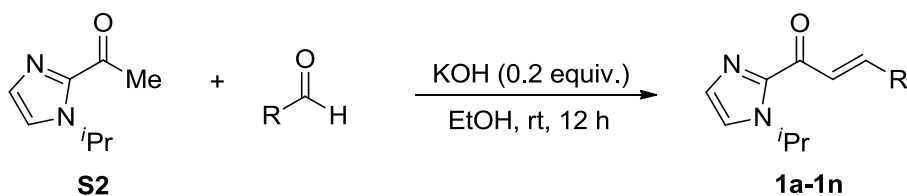

2-Acetyl-1-isopropylimidazole **S2** (10.0 mmol, 1.0 equiv.) and EtOH (20 mL) were added to a 100 mL RBF followed by aromatic aldehyde (10.0 mmol, 1.0 equiv.) and catalytic amount of KOH (0.2 equiv.). The solution was stirred for 12 h then transferred to a separatory funnel. Saturated NaCl (30 mL) and  $\text{H}_2\text{O}$  (10 mL) were added and the mixture was extracted with EtOAc ( $4 \times 75\text{ mL}$ ). The combined organic extracts were dried over sodium sulfate, filtered, and concentrated on a rotatory evaporator. The resulting residue was purified by flash column chromatography on silica gel (EtOAc/ Petroleum ether = 1:3).

**1a**<sup>4a</sup>, **1b**<sup>4c</sup>, **1c**<sup>4b</sup>, **1f**<sup>4c</sup>, **1g**<sup>4c</sup>, **1i**<sup>4c</sup>, **1m**<sup>4c</sup>, **1o**<sup>4a</sup>, **1p**<sup>4a</sup>, **1q**<sup>4c</sup>, **1r**<sup>4c</sup>, **2**<sup>2-3</sup> were known compounds, and all spectroscopic data were in agreement with literatures.



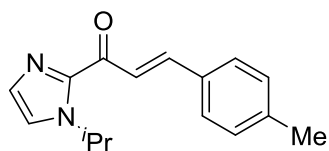

**1d**

According to the general procedure B, **1d** was obtained as white solid, 1.37 g, 54% yield,  $^1\text{H}$  NMR (400 MHz,  $\text{CDCl}_3$ ):  $\delta$  = 8.08 (d,  $J$  = 16.0 Hz, 1H), 7.79 (d,  $J$  = 16.0 Hz, 1H), 7.60 (d,  $J$  = 8.0 Hz, 2H), 7.31 (s, 1H), 7.25 (s, 1H), 7.20 (d,  $J$  = 8.0 Hz, 2H), 5.76-5.70 (m, 1H), 2.38 (s, 3H), 1.49 (d,  $J$  = 6.8 Hz, 6H).  $^{13}\text{C}$  NMR (100 MHz,  $\text{CDCl}_3$ ):  $\delta$  = 180.7, 143.5, 143.3, 140.9, 132.3, 129.7, 129.6, 128.8, 122.5, 121.3, 49.3, 23.7, 21.5. IR (KBr):  $\nu$  ( $\text{cm}^{-1}$ ) 3151, 2988, 2960, 1658, 1597, 1567, 1512, 1254, 920, 892, 811, 785, 734. HRMS (ESI,  $m/z$ ) calcd for  $\text{C}_{16}\text{H}_{18}\text{N}_2\text{NaO}$   $[\text{M}+\text{Na}]^+$ : 277.1311, found: 277.1310.

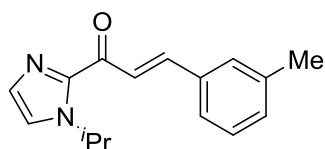

**1e**

According to the general procedure B, **1e** was obtained as yellow oil, 1.93 g, 76% yield,  $^1\text{H}$  NMR (400 MHz,  $\text{CDCl}_3$ ):  $\delta$  = 8.11 (d,  $J$  = 16.0 Hz, 1H), 7.78 (d,  $J$  = 16.0 Hz, 1H), 7.55 (s, 1H), 7.48 (d,  $J$  = 7.6 Hz, 1H), 7.32-7.26 (m, 3H), 7.21 (d,  $J$  = 7.6 Hz, 1H), 5.77-5.70 (m, 1H), 2.38 (s, 3H), 1.49 (d,  $J$  = 6.8 Hz, 6H).  $^{13}\text{C}$  NMR ( $\text{CDCl}_3$ , 100 MHz):  $\delta$  = 180.6, 143.4, 138.5, 134.9, 131.3, 129.8, 129.0, 128.7, 126.3, 123.2, 121.4, 49.4, 23.7, 21.3. IR (KBr):  $\nu$  ( $\text{cm}^{-1}$ ) 3106, 2981, 2931, 1608, 1464, 1452, 1392, 1016, 919, 864, 848, 837. HRMS (ESI,  $m/z$ ) calcd for  $\text{C}_{16}\text{H}_{18}\text{N}_2\text{NaO}$   $[\text{M}+\text{Na}]^+$ : 277.1311, found: 277.1309.

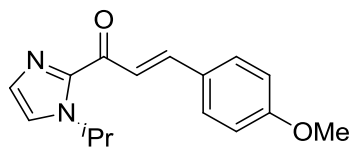

**1f**

According to the general procedure B, **1f** was obtained as yellow solid, 1.94 g, 72% yield,  $^1\text{H}$  NMR (400 MHz,  $\text{CDCl}_3$ ):  $\delta$  = 8.00 (d,  $J$  = 16.0 Hz, 1H), 7.78 (d,  $J$  = 16.0 Hz,

1H), 7.65 (d,  $J = 8.8$  Hz, 2H), 7.30 (s, 1H), 7.24 (s, 1H), 6.92 (d,  $J = 8.8$  Hz, 2H), 5.77-5.71 (m, 1H), 3.85 (d,  $J = 2.4$  Hz, 3H), 1.48 (d,  $J = 6.8$  Hz, 6H).  $^{13}\text{C}$  NMR (100 MHz,  $\text{CDCl}_3$ ):  $\delta = 180.7, 161.6, 143.5, 143.0, 130.5, 129.6, 127.8, 121.2, 121.2, 114.3, 55.4, 49.3, 23.7$ . IR (KBr):  $\nu$  ( $\text{cm}^{-1}$ ) 3154, 2957, 2833, 1655, 1567, 1511, 1455, 831, 812, 781, 757. HRMS (ESI,  $m/z$ ) calcd for  $\text{C}_{16}\text{H}_{18}\text{N}_2\text{NaO}_2$   $[\text{M}+\text{Na}]^+$ : 293.1260, found: 293.1259.

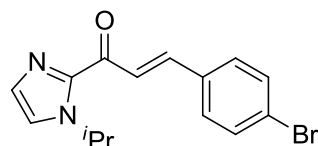

**1g**

According to the general procedure B, **1g** was obtained as yellow solid, 1.59 g, 50% yield,  $^1\text{H}$  NMR (400 MHz,  $\text{CDCl}_3$ ):  $\delta = 8.11$  (d,  $J = 16.0$  Hz, 1H), 7.72 (d,  $J = 16.0$  Hz, 1H), 7.56-7.51 (m, 4H), 7.33-7.25 (m, 2H), 5.74-5.67 (m, 1H), 1.50-1.48 (m, 6H).  $^{13}\text{C}$  NMR (100 MHz,  $\text{CDCl}_3$ ):  $\delta = 180.2, 143.3, 141.6, 134.0, 132.1, 130.0, 129.9, 124.6, 124.2, 121.6, 49.4, 23.7$ . IR (KBr):  $\nu$  ( $\text{cm}^{-1}$ ) 3146, 3078, 3034, 2983, 1655, 1586, 1564, 997, 947, 830, 817, 765. HRMS (ESI,  $m/z$ ) calcd for  $\text{C}_{15}\text{H}_{16}\text{BrN}_2\text{O}$   $[\text{M}+\text{H}]^+$ : 319.0441, found: 319.0443.

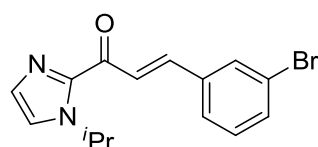

**1h**

According to the general procedure B, **1h** was obtained as yellow oil, 2.06 g, 65% yield,  $^1\text{H}$  NMR (400 MHz,  $\text{CDCl}_3$ ):  $\delta = 8.13$ -8.08 (m, 1H), 7.85 (t,  $J = 2.0$  Hz, 1H), 7.73-7.67 (m, 1H), 7.57 (d,  $J = 6.4$  Hz, 1H), 7.48 (d,  $J = 6.0$  Hz, 1H), 7.33-7.23 (m, 3H), 5.74-5.66 (m, 1H), 1.50-1.47 (m, 6H).  $^{13}\text{C}$  NMR (100 MHz,  $\text{CDCl}_3$ ):  $\delta = 180.0, 143.2, 141.1, 137.1, 133.0, 131.1, 130.3, 129.9, 127.4, 124.8, 123.0, 121.7, 49.4, 23.6$ . IR (KBr):  $\nu$  ( $\text{cm}^{-1}$ ) 2981, 2932, 1605, 1559, 1255, 1198, 1011, 806, 784, 745. HRMS (ESI,  $m/z$ ) calcd for  $\text{C}_{15}\text{H}_{15}\text{BrN}_2\text{NaO}$   $[\text{M}+\text{Na}]^+$ : 341.0260, found: 341.0257.

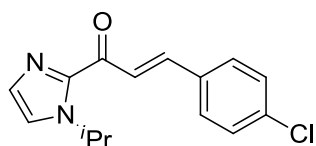

**1i**

According to the general procedure B, **1i** was obtained as white solid, 1.5 g, 55% yield,  $^1\text{H}$  NMR (400 MHz,  $\text{CDCl}_3$ ):  $\delta$  = 8.09 (d,  $J$  = 16.0 Hz, 1H), 7.74 (d,  $J$  = 16.0 Hz, 1H), 7.62 (d,  $J$  = 8.4 Hz, 2H), 7.38-7.25 (m, 4H), 5.75-5.68 (m, 1H), 1.49 (d,  $J$  = 6.8 Hz, 6H).  $^{13}\text{C}$  NMR (100 MHz,  $\text{CDCl}_3$ ):  $\delta$  = 180.3, 143.3, 141.6, 136.2, 133.5, 129.9, 129.8, 129.1, 124.0, 121.6, 49.4, 23.7. IR (KBr):  $\nu$  ( $\text{cm}^{-1}$ ) 3080, 2986, 1655, 1566, 1165, 919, 877, 820, 751, 645. HRMS (ESI,  $m/z$ ) calcd for  $\text{C}_{15}\text{H}_{15}\text{ClN}_2\text{NaO}$   $[\text{M}+\text{Na}]^+$ : 297.0765, found: 297.0764.

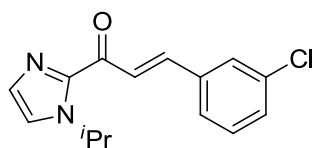

**1j**

According to the general procedure B, **1j** was obtained as white solid, 1.2 g, 43% yield,  $^1\text{H}$  NMR (400 MHz,  $\text{CDCl}_3$ ):  $\delta$  = 8.14-8.08 (m, 1H), 7.74-7.67 (m, 2H), 7.55-7.51 (m, 1H), 7.37-7.24 (m, 4H), 5.74-5.67 (m, 1H), 1.50-1.45 (m, 6H).  $^{13}\text{C}$  NMR (100 MHz,  $\text{CDCl}_3$ ):  $\delta$  = 180.1, 143.2, 141.3, 141.3, 136.9, 134.9, 130.1, 130.0, 130.0, 128.2, 126.9, 124.9, 121.7, 49.4, 23.7. IR (KBr):  $\nu$  ( $\text{cm}^{-1}$ ) 3141, 3070, 2977, 1658, 1600, 1254, 1200, 915, 813, 745. HRMS (ESI,  $m/z$ ) calcd for  $\text{C}_{15}\text{H}_{16}\text{ClN}_2\text{O}$   $[\text{M}+\text{H}]^+$ : 275.0946, found: 275.0948.

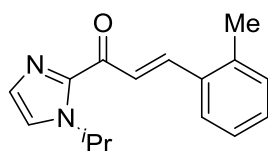

**1k**

According to the general procedure B, **1k** was obtained as white solid, 1.6 g, 63% yield,  $^1\text{H}$  NMR (400 MHz,  $\text{CDCl}_3$ ):  $\delta$  = 8.16-8.04 (m, 2H), 7.81 (d,  $J$  = 7.6 Hz, 1H), 7.32-7.20 (m, 5H), 5.76-5.70 (m, 1H), 2.50 (s, 3H), 1.50 (d,  $J$  = 6.8 Hz, 6H).  $^{13}\text{C}$  NMR (100 MHz,  $\text{CDCl}_3$ ):  $\delta$  = 180.7, 143.4, 140.6, 138.3, 133.8, 130.8, 130.2, 129.9, 126.8, 126.3, 124.4, 121.4, 49.4, 23.7, 19.8. IR (KBr):  $\nu$  ( $\text{cm}^{-1}$ ) 3155, 3098, 2965,

1659, 1596, 1452, 1218, 1074, 921, 856, 774. HRMS (ESI,  $m/z$ ) calcd for  $C_{16}H_{18}N_2NaO$   $[M+Na]^+$ : 277.1311, found: 277.1311.

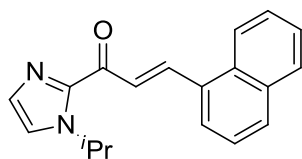

**1l**

According to the general procedure B, **1l** was obtained as yellow oil, 1.4 g, 49% yield,  $^1H$  NMR (400 MHz,  $CDCl_3$ ):  $\delta$  = 8.70 (d,  $J$  = 15.6 Hz, 1H), 8.32 (d,  $J$  = 8.4 Hz, 1H), 8.23 (d,  $J$  = 15.6 Hz, 1H), 8.03 (d,  $J$  = 7.2 Hz, 1H), 7.89 (t,  $J$  = 9.2 Hz, 2H), 7.60-7.49 (m, 3H), 7.33 (s, 1H), 7.27 (s, 1H), 5.80-5.74 (m, 1H), 1.52 (d,  $J$  = 6.4 Hz, 6H).  $^{13}C$  NMR ( $CDCl_3$ , 100 MHz):  $\delta$  = 180.5, 143.4, 139.8, 133.8, 132.2, 131.9, 130.7, 129.9, 128.8, 126.8, 126.1, 125.9, 125.5, 125.5, 123.5, 121.5, 49.5, 23.7. IR (KBr):  $\nu$  ( $cm^{-1}$ ) 3136, 2975, 2931, 1649, 1594, 1572, 1020, 1006, 798, 786, 774. HRMS (ESI,  $m/z$ ) calcd for  $C_{19}H_{18}N_2NaO$   $[M+Na]^+$ : 313.1311, found: 313.1310.

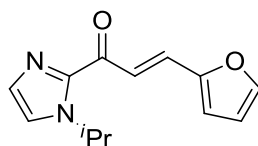

**1m**

According to the general procedure B, **1m** was obtained as brown solid, 1.9 g, 83% yield,  $^1H$  NMR (400 MHz,  $CDCl_3$ ):  $\delta$  = 7.97 (d,  $J$  = 15.6 Hz, 1H), 7.59-7.51 (m, 2H), 7.31 (s, 1H), 7.23 (s, 1H), 6.73 (d,  $J$  = 3.2 Hz, 1H), 6.49-6.48 (m, 1H), 5.74-5.68 (m, 1H), 1.48-1.46 (m, 6H).  $^{13}C$  NMR (100 MHz,  $CDCl_3$ ):  $\delta$  = 180.4, 152.0, 144.9, 143.3, 129.8, 129.2, 121.6, 121.3, 115.4, 112.5, 49.2, 23.6. IR (KBr):  $\nu$  ( $cm^{-1}$ ) 3102, 2981, 1662, 1552, 1007, 980, 930, 922, 881, 700. HRMS (ESI,  $m/z$ ) calcd for  $C_{13}H_{14}N_2NaO_2$   $[M+Na]^+$ : 253.0947, found: 253.0946.

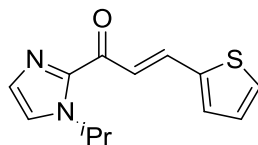

**1n**

According to the general procedure B, **1n** was obtained as yellow solid, 1.5 g, 60% yield,  $^1H$  NMR (400 MHz,  $CDCl_3$ ):  $\delta$  = 7.96-7.87 (m, 2H), 7.41-7.25 (m, 4H), 7.07 (s,

1H), 5.74-5.68 (m, 1H), 1.48 (d,  $J = 6.8$  Hz, 6H).  $^{13}\text{C}$  NMR (100 MHz,  $\text{CDCl}_3$ ):  $\delta = 180.2, 143.3, 140.7, 135.6, 131.7, 129.8, 129.0, 128.2, 122.5, 121.4, 49.3, 23.7$ . IR (KBr):  $\nu$  ( $\text{cm}^{-1}$ ) 3150, 3117, 2980, 1651, 1587, 1515, 966, 919, 837, 770, 743, 716. HRMS (ESI,  $m/z$ ) calcd for  $\text{C}_{13}\text{H}_{14}\text{N}_2\text{NaOS}$   $[\text{M}+\text{Na}]^+$ : 269.0719, found: 269.0719.

### 3. Substrate Scope

#### (i) General procedure C for chiral-at-metal rhodium complex catalyzed asymmetric conjugate addition of alkenes with $\alpha,\beta$ -unsaturated 2 - acyl imidazoles.

To an oven-dried 25 mL Schlenk tube equipped with a stir bar,  **$\Lambda$ -Rh3** (1 mol %) was added along with  $\alpha,\beta$ -unsaturated 2-acyl imidazole **1** (0.25 mmol), alkene **2** (0.3 mmol) and DCE (0.5 mL). The reaction was stirring at  $30^\circ\text{C}$  until consumption of the 2-acyl imidazole as monitored by thin layer chromatography. The solution directly purified by silica gel column chromatography (EtOAc/Petroleum ether = 1:4) to afford desired adducts **3**.

#### (ii) According to the general procedure D for hydrogenation reduction of **3k**.

To an oven-dried 25 mL Schlenk tube equipped with a stir bar, **3k** (after recrystallization, ee % > 99%, 0.25 mmol) and 5mol % Pd/C (133 mg) in MeOH (2 ml) at  $30^\circ\text{C}$  for 23 h under  $\text{H}_2$  atmosphere. The solution directly purified by silica gel column chromatography (EtOAc/Petroleum ether = 1:4) to afford desired adduct **4**.

#### (iii) General procedure for gram-scale experiments with lower catalyst loading.

To an oven-dried 50 mL Schlenk tube equipped with a stir bar,  **$\Lambda$ -Rh3** (1 mol %) was added along with  $\alpha,\beta$ -unsaturated 2-acyl imidazole **1k** (3.5 mmol), alkene **2a** (4.2 mmol) and DCE (7 mL). The reaction was stirring at  $30^\circ\text{C}$  for 4 h. The solution directly purified by silica gel column chromatography (EtOAc/Petroleum ether = 1:4) to afford desired adduct **3k**.

To an oven-dried 50 mL Schlenk tube equipped with a stir bar,  **$\Lambda$ -Rh3** (0.05 mol %) was added along with  $\alpha,\beta$ -unsaturated 2-acyl imidazole **1k** (3.93 mmol), alkene **2a**

(4.7 mmol) and DCE (4 mL). The reaction was stirring at 30 °C for 72 h. The solution directly purified by silica gel column chromatography (EtOAc/Petroleum ether = 1:4) to afford desired adduct **3k**.

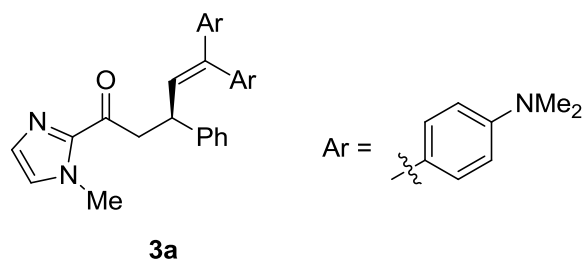

According to the general procedure C, **3a** was obtained as yellow oil, 104 mg, 87% yield, 92% ee,  $[\alpha]_{\text{D}}^{25} = +95.8$  ( $c = 0.5$ ,  $\text{CHCl}_3$ ); The ee was determined by HPLC (Chiralpak column IC,  $\lambda = 254$  nm, hexane/*i*-PrOH = 92/8, flow rate 1.0 mL/min,  $t_{\text{major}} = 30.88$  min,  $t_{\text{minor}} = 35.18$  min).  $^1\text{H}$  NMR (400 MHz,  $\text{CDCl}_3$ ):  $\delta = 7.31$  (d,  $J = 7.2$  Hz, 2H), 7.26 (t,  $J = 7.6$  Hz, 2H), 7.14 (t,  $J = 7.2$  Hz, 1H), 7.08 (s, 1H), 7.02 (d,  $J = 8.8$  Hz, 2H), 6.92 (t,  $J = 6.0$  Hz, 3H), 6.68 (d,  $J = 8.8$  Hz, 2H), 6.57 (d,  $J = 8.8$  Hz, 2H), 6.08 (d,  $J = 10.4$  Hz, 1H), 4.28-4.22 (m, 1H), 3.85 (s, 3H), 3.61-3.49 (m, 2H), 2.96 (s, 6H), 2.89 (s, 6H).  $^{13}\text{C}$  NMR (100 MHz,  $\text{CDCl}_3$ ):  $\delta = 191.2$ , 149.7, 149.5, 145.0, 143.4, 141.4, 131.7, 130.6, 128.9, 128.4, 128.4, 128.3, 127.6, 127.3, 126.7, 126.0, 112.1, 112.0, 46.4, 41.7, 40.7, 40.6, 36.1. IR (KBr):  $\nu$  ( $\text{cm}^{-1}$ ) 2962, 1674, 1608, 1521, 1407, 1261, 1224, 1192, 1028, 819. HRMS (ESI,  $m/z$ ) calcd for  $\text{C}_{31}\text{H}_{35}\text{N}_4\text{O}$   $[\text{M}+\text{H}]^+$ : 479.2805, found: 479.2804.

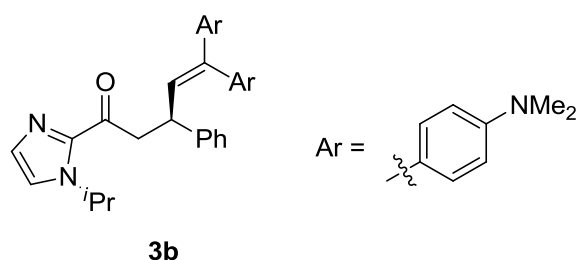

According to the general procedure C, **3b** was obtained as white solid, 118 mg, 93% yield, 95% ee,  $[\alpha]_{\text{D}}^{25} = +131.7$  ( $c = 0.5$ ,  $\text{CHCl}_3$ ); The ee was determined by HPLC (Chiralpak column IC,  $\lambda = 254$  nm, hexane/*i*-PrOH = 92/8, flow rate 1.0 mL/min,  $t_{\text{major}} = 30.92$  min,  $t_{\text{minor}} = 25.87$  min).  $^1\text{H}$  NMR (400 MHz,  $\text{CDCl}_3$ ):  $\delta = 7.30$  (d,  $J = 7.2$  Hz, 2H), 7.27-7.23 (m, 2H), 7.19 (d,  $J = 0.4$  Hz, 1H), 7.14 (t,  $J = 7.2$  Hz, 2H), 7.00 (d,  $J = 8.8$  Hz, 2H), 6.93 (d,  $J = 8.8$  Hz, 2H), 6.68 (d,  $J = 8.8$  Hz, 2H), 6.56 (d,  $J = 8.8$  Hz, 2H), 6.09 (d,  $J = 10.4$  Hz, 1H), 5.45-5.38 (m, 1H), 4.28-4.22 (m, 1H), 3.57

(d,  $J = 7.6$  Hz, 2H), 2.96 (s, 6H), 2.89 (s, 6H), 1.32 (t,  $J = 7.2$  Hz, 6H).  $^{13}\text{C}$  NMR (100 MHz,  $\text{CDCl}_3$ ):  $\delta = 191.4, 149.7, 149.5, 145.1, 142.8, 141.4, 131.8, 130.7, 129.4, 128.4, 128.4, 127.6, 127.4, 125.9, 120.9, 112.1, 112.0, 49.0, 47.0, 42.0, 40.7, 40.6, 23.7, 23.5$ . IR (KBr):  $\nu$  ( $\text{cm}^{-1}$ ) 2964, 2800, 1672, 1609, 1522, 1395, 1224, 1192, 947, 819, 701. HRMS (ESI,  $m/z$ ) calcd for  $\text{C}_{33}\text{H}_{39}\text{N}_4\text{O}$   $[\text{M}+\text{H}]^+$ : 507.3118, found: 507.3121.

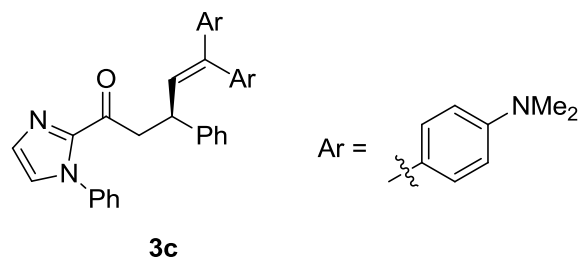

According to the general procedure C, **3c** was obtained as yellow oil, 122 mg, 90% yield, 86% ee,  $[\alpha]_{\text{D}}^{25} = +69.2$  ( $c = 0.5$ ,  $\text{CHCl}_3$ ); The ee was determined by HPLC (Chiralpak column IC,  $\lambda = 254$  nm, hexane/*i*-PrOH = 92/8, flow rate 1.0 mL/min,  $t_{\text{major}} = 42.55$  min,  $t_{\text{minor}} = 36.63$  min).  $^1\text{H}$  NMR (400 MHz,  $\text{CDCl}_3$ ):  $\delta = 7.38\text{--}7.23$  (m, 8H), 7.15 (t,  $J = 6.8$  Hz, 1H), 7.10 (s, 1H), 7.07–7.01 (m, 4H), 6.87 (d,  $J = 8.8$  Hz, 2H), 6.64–6.57 (m, 4H), 6.12 (d,  $J = 10.4$  Hz, 1H), 4.28–4.21 (m, 1H), 3.63–3.58 (m, 1H), 3.47–3.42 (m, 1H), 2.94 (s, 6H), 2.90 (s, 6H).  $^{13}\text{C}$  NMR (100 MHz,  $\text{CDCl}_3$ ):  $\delta = 189.9, 149.8, 149.5, 145.0, 143.4, 141.6, 138.3, 131.6, 130.6, 129.5, 128.9, 128.5, 128.2, 127.7, 127.1, 126.7, 126.0, 125.7, 112.1, 112.0, 46.9, 42.2, 40.7$ . IR (KBr):  $\nu$  ( $\text{cm}^{-1}$ ) 2963, 2853, 2799, 1683, 1608, 1521, 1193, 1150, 948, 819, 763. HRMS (ESI,  $m/z$ ) calcd for  $\text{C}_{36}\text{H}_{37}\text{N}_4\text{O}$   $[\text{M}+\text{H}]^+$ : 541.2962, found: 541.2962.

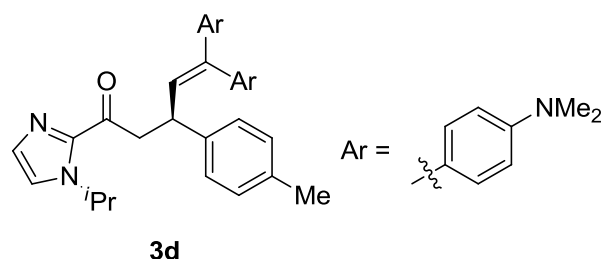

According to the general procedure C, **3d** was obtained as yellow oil, 124 mg, 95% yield, 93% ee,  $[\alpha]_{\text{D}}^{25} = +72.0$  ( $c = 0.5$ ,  $\text{CHCl}_3$ ); The ee was determined by HPLC (Chiralpak column IC,  $\lambda = 254$  nm, hexane/*i*-PrOH = 75/25, flow rate 1.0 mL/min,



$t_{\text{major}} = 9.15$  min,  $t_{\text{minor}} = 7.93$  min).  $^1\text{H}$  NMR (400 MHz,  $\text{CDCl}_3$ ):  $\delta = 7.20$  (d,  $J = 8.0$  Hz, 3H), 7.14 (s, 1H), 7.07 (d,  $J = 8.0$  Hz, 2H), 6.98 (d,  $J = 8.8$  Hz, 2H), 6.93 (d,  $J = 8.8$  Hz, 2H), 6.67 (d,  $J = 8.8$  Hz, 2H), 6.56 (d,  $J = 8.8$  Hz, 2H), 6.07 (d,  $J = 10.4$  Hz, 1H), 5.45-5.38 (m, 1H), 4.25-4.18 (m, 1H), 3.60-3.49 (m, 2H), 2.96 (s, 6H), 2.89 (s, 6H), 2.28 (s, 3H), 1.33-1.31 (m, 6H).  $^{13}\text{C}$  NMR (100 MHz,  $\text{CDCl}_3$ ):  $\delta = 191.6, 149.7, 149.4, 142.8, 142.1, 141.1, 135.3, 131.9, 130.7, 129.4, 129.1, 128.5, 128.4, 127.6, 127.4, 120.8, 112.0, 112.0, 49.0, 47.1, 41.6, 40.7, 40.6, 23.7, 23.5, 21.1$ . IR (KBr):  $\nu$  ( $\text{cm}^{-1}$ ) 2964, 2924, 1673, 1609, 1521, 1397, 1261, 1093, 817. HRMS (ESI,  $m/z$ ) calcd for  $\text{C}_{34}\text{H}_{41}\text{N}_4\text{O}$   $[\text{M}+\text{H}]^+$ : 521.3275, found: 521.3277.

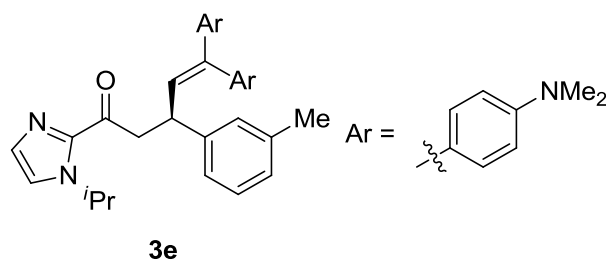

According to the general procedure C, **3e** was obtained as brown solid, 122 mg, 94% yield, 90% ee,  $[\alpha]_{\text{D}}^{25} = +138.9$  ( $c = 0.5$ ,  $\text{CHCl}_3$ ); The ee was determined by HPLC (Chiralpak column IC,  $\lambda = 254$  nm, hexane/*i*-PrOH = 92/8, flow rate 1.0 mL/min,  $t_{\text{major}} = 25.62$  min,  $t_{\text{minor}} = 20.59$  min).  $^1\text{H}$  NMR (400 MHz,  $\text{CDCl}_3$ ):  $\delta = 7.18$  (s, 1H), 7.16-7.09 (m, 4H), 7.00-6.92 (m, 5H), 6.67 (d,  $J = 8.8$  Hz, 2H), 6.56 (d,  $J = 8.8$  Hz, 2H), 6.09 (d,  $J = 10.4$  Hz, 1H), 5.45-5.38 (m, 1H), 4.25-4.18 (m, 1H), 3.61-3.49 (m, 2H), 2.96 (s, 6H), 2.88 (s, 6H), 2.29 (s, 3H), 1.32 (t,  $J = 6.8$  Hz, 6H).  $^{13}\text{C}$  NMR (100 MHz,  $\text{CDCl}_3$ ):  $\delta = 191.5, 149.7, 149.5, 145.1, 142.8, 141.3, 137.9, 131.9, 130.7, 129.4, 128.5, 128.4, 128.3, 128.3, 127.5, 126.7, 124.7, 120.8, 112.1, 112.0, 49.0, 47.2, 42.0, 40.7, 40.6, 23.7, 23.5, 21.6$ . IR (KBr):  $\nu$  ( $\text{cm}^{-1}$ ) 2884, 2799, 1672, 1608, 1521, 1395, 1351, 947, 820, 706. HRMS (ESI,  $m/z$ ) calcd for  $\text{C}_{34}\text{H}_{41}\text{N}_4\text{O}$   $[\text{M}+\text{H}]^+$ : 521.3275, found: 521.3279.

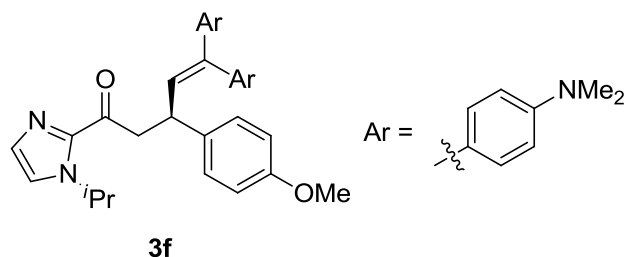

According to the general procedure C, **3f** was obtained as yellow oil, 107 mg, 80% yield, 87% ee,  $[\alpha]_{\text{D}}^{25} = +63.6$  ( $c = 0.5$ ,  $\text{CHCl}_3$ ); The ee was determined by HPLC (Chiralpak column IC,  $\lambda = 254$  nm, hexane/*i*-PrOH = 92/8, flow rate 1.0 mL/min,  $t_{\text{major}} = 34.16$  min,  $t_{\text{minor}} = 39.30$  min).  $^1\text{H}$  NMR (400 MHz,  $\text{CDCl}_3$ ):  $\delta = 7.23$ -7.19 (m, 3H), 7.14 (s, 1H), 6.99 (d,  $J = 8.8$  Hz, 2H), 6.93 (d,  $J = 8.4$  Hz, 2H), 6.80 (d,  $J = 8.4$  Hz, 2H), 6.67 (d,  $J = 8.4$  Hz, 2H), 6.56 (d,  $J = 8.8$  Hz, 2H), 6.07 (d,  $J = 10.4$  Hz, 1H), 5.45-5.38 (m, 1H), 4.24-4.17 (m, 1H), 3.75 (s, 3H), 3.53 (d,  $J = 7.6$  Hz, 2H), 2.96 (s, 6H), 2.88 (s, 6H), 1.32 (t,  $J = 6.0$  Hz, 6H).  $^{13}\text{C}$  NMR (100 MHz,  $\text{CDCl}_3$ ):  $\delta = 191.6$ , 157.7, 149.7, 149.4, 142.8, 141.1, 137.3, 131.8, 130.6, 129.4, 128.5, 128.4, 127.6, 120.9, 113.8, 112.1, 112.0, 55.2, 49.0, 47.2, 41.2, 40.7, 40.6, 23.7, 23.5. IR (KBr):  $\nu$  ( $\text{cm}^{-1}$ ) 2963, 2800, 1672, 1609, 1396, 1351, 1258, 1091, 1032, 818. HRMS (ESI,  $m/z$ ) calcd for  $\text{C}_{34}\text{H}_{41}\text{N}_4\text{O}_2$   $[\text{M}+\text{H}]^+$ : 537.3224, found: 537.3224.

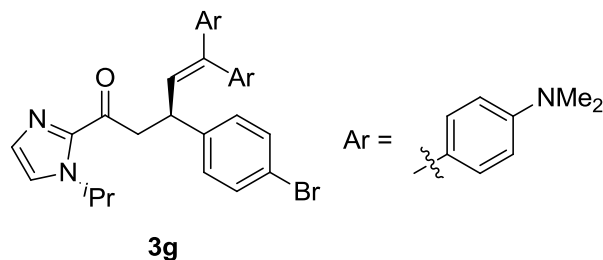

According to the general procedure C, **3g** was obtained as yellow oil, 139 mg, 95% yield, 93% ee,  $[\alpha]_{\text{D}}^{25} = +99.5$  ( $c = 0.5$ ,  $\text{CHCl}_3$ ); The ee was determined by HPLC (Chiralpak column IC,  $\lambda = 254$  nm, hexane/*i*-PrOH = 90/10, flow rate 1.0 mL/min,  $t_{\text{major}} = 11.80$  min,  $t_{\text{minor}} = 17.33$  min).  $^1\text{H}$  NMR (400 MHz,  $\text{CDCl}_3$ ):  $\delta = 7.36$  (d,  $J = 8.4$  Hz, 2H), 7.21 (s, 1H), 7.15 (t,  $J = 5.6$  Hz, 3H), 7.00 (d,  $J = 8.8$  Hz, 2H), 6.90 (d,  $J = 8.4$  Hz, 2H), 6.68 (d,  $J = 8.4$  Hz, 2H), 6.57 (d,  $J = 8.8$  Hz, 2H), 6.03 (d,  $J = 10.0$  Hz, 1H), 5.44-5.37 (m, 1H), 4.23-4.17 (m, 1H), 3.58-3.51 (m, 2H), 2.97 (s, 6H), 2.90 (s, 6H), 1.33 (t,  $J = 6.0$  Hz, 6H).  $^{13}\text{C}$  NMR (100 MHz,  $\text{CDCl}_3$ ):  $\delta = 191.0$ , 149.8, 149.5,

144.3, 142.6, 142.0, 131.4, 130.5, 129.5, 129.4, 128.4, 128.2, 126.5, 121.0, 119.6, 112.1, 112.0, 49.1, 46.7, 41.3, 40.6, 40.6, 23.7, 23.5. IR (KBr):  $\nu$  (cm<sup>-1</sup>) 2964, 2800, 1672, 1608, 1521, 1394, 1352, 1261, 948, 818. HRMS (ESI,  $m/z$ ) calcd for C<sub>33</sub>H<sub>38</sub>BrN<sub>4</sub>O [M+H]<sup>+</sup>: 585.2224, found: 585.2227.

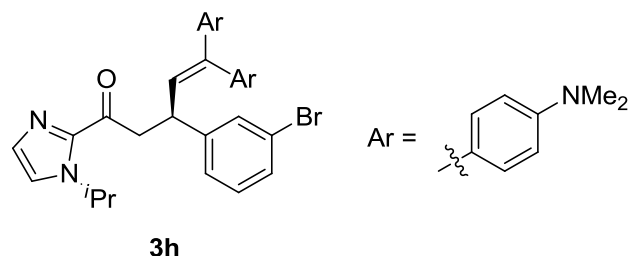

According to the general procedure C, **3h** was obtained as brown oil, 126 mg, 86% yield, 94% ee,  $[\alpha]_D^{25} = +91.5$  ( $c = 0.5$ , CHCl<sub>3</sub>); The ee was determined by HPLC (Chiralpak column IE,  $\lambda = 254$  nm, hexane/*i*-PrOH = 90/10, flow rate 1.0 mL/min,  $t_{\text{major}} = 12.62$  min,  $t_{\text{minor}} = 14.50$  min). <sup>1</sup>H NMR (400 MHz, CDCl<sub>3</sub>):  $\delta = 7.41$  (t,  $J = 1.6$  Hz, 1H), 7.27-7.25 (m, 1H), 7.21 (d,  $J = 7.2$  Hz, 2H), 7.14-7.09 (m, 2H), 7.02-7.00 (m, 2H), 6.91-6.89 (m, 2H), 6.68 (d,  $J = 8.8$  Hz, 2H), 6.58 (t,  $J = 4.4$  Hz, 2H), 6.04 (d,  $J = 10.4$  Hz, 1H), 5.45-5.38 (m, 1H), 4.24-4.17 (m, 1H), 3.55-3.53 (m, 2H), 2.97 (s, 6H), 2.90 (s, 6H), 1.34 (t,  $J = 6.4$  Hz, 6H). <sup>13</sup>C NMR (100 MHz, CDCl<sub>3</sub>):  $\delta = 190.9, 149.8, 149.5, 147.6, 142.6, 142.3, 131.4, 130.7, 130.5, 129.9, 129.5, 129.0, 128.3, 128.1, 126.3, 126.3, 122.4, 121.0, 112.1, 112.0, 49.1, 46.8, 41.7, 40.6, 40.6, 23.6, 23.5$ . IR (KBr):  $\nu$  (cm<sup>-1</sup>) 2964, 2884, 2800, 1673, 1521, 1395, 1353, 1259, 947, 819. HRMS (ESI,  $m/z$ ) calcd for C<sub>33</sub>H<sub>38</sub>BrN<sub>4</sub>O [M+H]<sup>+</sup>: 585.2224, found: 585.2217.

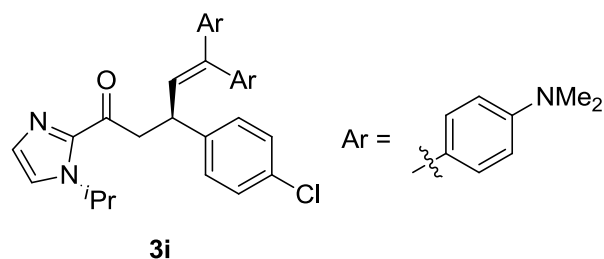

According to the general procedure C, **3i** was obtained as yellow oil, 124 mg, 92% yield, 94% ee,  $[\alpha]_D^{25} = +110.1$  ( $c = 0.5$ , CHCl<sub>3</sub>); The ee was determined by HPLC (Chiralpak column IC,  $\lambda = 254$  nm, hexane/*i*-PrOH = 92/8, flow rate 1.0 mL/min,  $t_{\text{major}} = 13.33$  min,  $t_{\text{minor}} = 18.81$  min). <sup>1</sup>H NMR (400 MHz, CDCl<sub>3</sub>):  $\delta = 7.21$  (d,  $J =$

4.8 Hz, 5H), 7.14 (s, 1H), 7.00 (d,  $J = 8.8$  Hz, 2H), 6.90 (d,  $J = 8.4$  Hz, 2H), 6.67 (d,  $J = 8.4$  Hz, 2H), 6.57 (d,  $J = 8.8$  Hz, 2H), 6.04 (d,  $J = 10.4$  Hz, 1H), 5.44-5.37 (m, 1H), 4.25-4.19 (m, 1H), 3.60-3.49 (m, 2H), 2.96 (s, 6H), 2.89 (s, 6H), 1.33 (t,  $J = 6.4$  Hz, 6H).  $^{13}\text{C}$  NMR (100 MHz,  $\text{CDCl}_3$ ):  $\delta = 191.1, 149.8, 149.5, 143.7, 142.6, 141.9, 131.5, 131.4, 130.5, 129.5, 129.0, 128.5, 128.4, 128.2, 126.6, 121.0, 112.1, 112.0, 49.1, 46.8, 41.3, 40.6, 40.6, 23.7, 23.5$ . IR (KBr):  $\nu$  ( $\text{cm}^{-1}$ ) 2884, 2800, 1673, 1608, 1521, 1396, 1352, 948, 819, 768. HRMS (ESI,  $m/z$ ) calcd for  $\text{C}_{33}\text{H}_{38}\text{ClN}_4\text{O}$   $[\text{M}+\text{H}]^+$ : 541.2729, found: 541.2730.

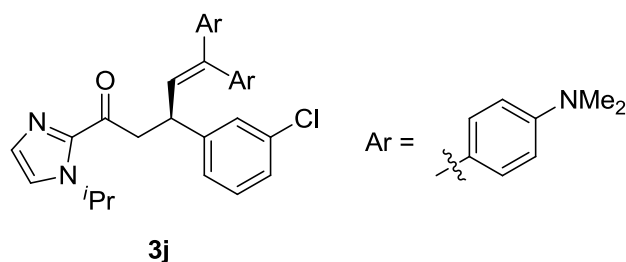

According to the general procedure C, **3j** was obtained as yellow oil, 129 mg, 95% yield, 94% ee,  $[\alpha]_{\text{D}}^{25} = +119.3$  ( $c = 0.5$ ,  $\text{CHCl}_3$ ); The ee was determined by HPLC (Chiralpak column IE,  $\lambda = 254$  nm, hexane/*i*-PrOH = 92/8, flow rate 1.0 mL/min,  $t_{\text{major}} = 14.22$  min,  $t_{\text{minor}} = 16.71$  min).  $^1\text{H}$  NMR (400 MHz,  $\text{CDCl}_3$ ):  $\delta = 7.27$  (s, 1H), 7.21-7.10 (m, 5H), 7.01 (d,  $J = 8.4$  Hz, 2H), 6.91 (d,  $J = 8.8$  Hz, 2H), 6.68 (d,  $J = 8.8$  Hz, 2H), 6.57 (d,  $J = 8.8$  Hz, 2H), 6.04 (d,  $J = 10.4$  Hz, 1H), 5.45-5.38 (m, 1H), 4.25-4.19 (m, 1H), 3.55 (d,  $J = 7.2$  Hz, 2H), 2.97 (s, 6H), 2.90 (s, 6H), 1.33 (t,  $J = 6.4$  Hz, 6H).  $^{13}\text{C}$  NMR (100 MHz,  $\text{CDCl}_3$ ):  $\delta = 190.9, 149.8, 149.5, 147.3, 142.6, 142.2, 134.1, 131.4, 130.5, 129.7, 129.5, 128.4, 128.1, 127.8, 126.3, 126.1, 125.8, 121.0, 112.1, 112.0, 49.1, 46.8, 41.6, 40.6, 40.6, 23.7, 23.5$ . IR (KBr):  $\nu$  ( $\text{cm}^{-1}$ ) 2964, 2886, 2800, 1673, 1608, 1521, 1396, 1353, 1260, 819, 697. HRMS (ESI,  $m/z$ ) calcd for  $\text{C}_{33}\text{H}_{38}\text{ClN}_4\text{O}$   $[\text{M}+\text{H}]^+$ : 541.2729, found: 541.2727.

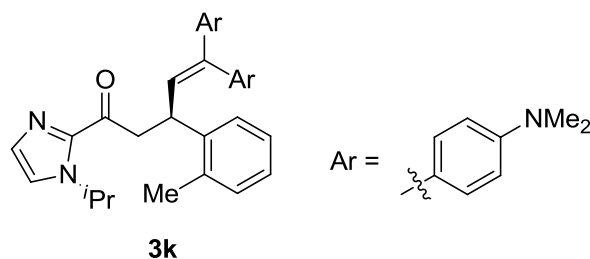

According to the general procedure C, **3k** was obtained as white solid, 124 mg, 95% yield, 93% ee,  $[\alpha]_D^{25} = +35.5$  ( $c = 0.5$ ,  $\text{CHCl}_3$ ); The ee was determined by HPLC (Chiralpak column IC,  $\lambda = 254$  nm, hexane/*i*-PrOH = 95/5, flow rate 1.0 mL/min,  $t_{\text{major}} = 27.64$  min,  $t_{\text{minor}} = 30.58$  min).  $^1\text{H}$  NMR (400 MHz,  $\text{CDCl}_3$ ):  $\delta = 7.33$  (d,  $J = 7.6$  Hz, 1H), 7.13 (s, 1H), 7.08-7.03 (m, 2H), 7.00-6.96 (m, 2H), 6.90 (d,  $J = 8.4$  Hz, 2H), 6.80 (d,  $J = 8.4$  Hz, 2H), 6.57 (d,  $J = 8.4$  Hz, 2H), 6.49 (d,  $J = 8.4$  Hz, 2H), 6.07 (d,  $J = 10.0$  Hz, 1H), 5.38-5.28 (m, 1H), 4.37-4.31 (m, 1H), 3.55-3.44 (m, 1H), 3.40-3.35 (m, 1H), 2.87 (s, 6H), 2.82 (s, 6H), 2.04 (s, 3H), 1.25 (t,  $J = 7.2$  Hz, 6H).  $^{13}\text{C}$  NMR (100 MHz,  $\text{CDCl}_3$ ):  $\delta = 190.7, 148.6, 148.4, 142.7, 141.8, 140.4, 134.5, 130.7, 129.4, 129.3, 128.4, 127.6, 127.3, 126.4, 125.9, 125.0, 124.6, 119.8, 111.1, 110.9, 47.9, 46.0, 39.6, 39.6, 37.2, 22.6, 22.5, 18.3$ . IR (KBr):  $\nu$  ( $\text{cm}^{-1}$ ) 2925, 2853, 2798, 1667, 1608, 1521, 1394, 1350, 947, 820, 759. HRMS (ESI,  $m/z$ ) calcd for  $\text{C}_{34}\text{H}_{41}\text{N}_4\text{O}$   $[\text{M}+\text{H}]^+$ : 521.3275, found: 521.3276.

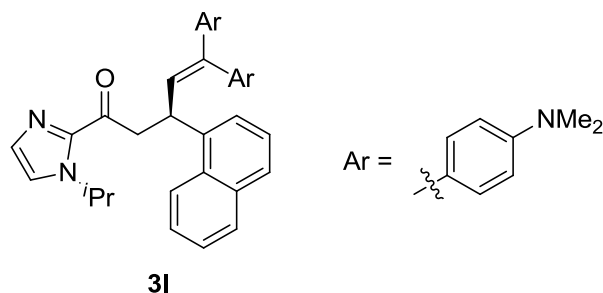

According to the general procedure C, **3l** was obtained as yellow solid, 114 mg, 82% yield, 88% ee,  $[\alpha]_D^{25} = -43.6$  ( $c = 0.5$ ,  $\text{CHCl}_3$ ); The ee was determined by HPLC (Chiralpak column IC,  $\lambda = 254$  nm, hexane/*i*-PrOH = 90/10, flow rate 1.0 mL/min,  $t_{\text{major}} = 13.66$  min,  $t_{\text{minor}} = 18.18$  min).  $^1\text{H}$  NMR (400 MHz,  $\text{CDCl}_3$ ):  $\delta = 8.02$  (d,  $J = 8.0$  Hz, 1H), 7.82 (t,  $J = 6.0$  Hz, 1H), 7.69-7.61 (m, 2H), 7.44-7.38 (m, 3H), 7.19 (d,  $J = 12.4$  Hz, 2H), 6.99 (d,  $J = 8.8$  Hz, 2H), 6.84 (d,  $J = 8.4$  Hz, 2H), 6.58-6.55 (m, 4H), 6.28 (s, 1H), 5.41-5.35 (m, 1H), 5.12-5.06 (m, 1H), 3.64 (d,  $J = 7.6$  Hz, 2H), 2.93 (s, 6H), 2.90 (s, 6H), 1.30 (t,  $J = 7.2$  Hz, 6H).  $^{13}\text{C}$  NMR (100 MHz,  $\text{CDCl}_3$ ):  $\delta = 191.7, 149.7, 149.5, 142.8, 141.8, 141.7, 134.0, 131.8, 131.0, 130.7, 129.5, 128.6, 128.3, 127.1, 126.6, 125.7, 125.6, 125.3, 124.4, 124.2, 120.9, 112.1, 112.0, 49.0, 47.6, 40.7, 40.6, 37.9, 23.6, 23.5$ . IR (KBr):  $\nu$  ( $\text{cm}^{-1}$ ) 2930, 2884, 2800, 1670, 1521, 1395, 1354,

948, 821, 778. HRMS (ESI,  $m/z$ ) calcd for  $C_{37}H_{41}N_4O$   $[M+H]^+$ : 557.3275, found: 557.3269.

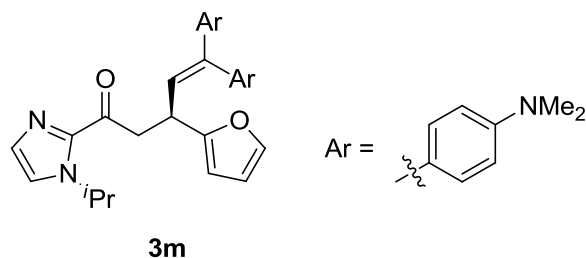

According to the general procedure C, **3m** was obtained as brown oil, 114 mg, 92% yield, 88% ee,  $[\alpha]_D^{25} = +90.0$  ( $c = 0.5$ ,  $CHCl_3$ ); The ee was determined by HPLC (Chiralpak column IC,  $\lambda = 254$  nm, hexane/*i*-PrOH = 80/20, flow rate 1.0 mL/min,  $t_{major} = 23.65$  min,  $t_{minor} = 15.56$  min).  $^1H$  NMR (400 MHz,  $CDCl_3$ ):  $\delta = 7.28$  (s, 1H), 7.20 (s, 1H), 7.12 (s, 1H), 7.04 (d,  $J = 8.4$  Hz, 4H), 6.68 (d,  $J = 8.8$  Hz, 2H), 6.58 (d,  $J = 8.8$  Hz, 2H), 6.25-6.24 (m, 1H), 6.07 (d,  $J = 3.2$  Hz, 1H), 5.94 (d,  $J = 10.4$  Hz, 1H), 5.49-5.42 (m, 1H), 4.40-4.34 (m, 1H), 3.68-3.62 (m, 1H), 3.50-3.44 (m, 1H), 2.95 (s, 6H), 2.90 (s, 6H), 1.36-1.34 (m, 6H).  $^{13}C$  NMR (100 MHz,  $CDCl_3$ ):  $\delta = 190.9$ , 157.6, 149.8, 149.5, 142.7, 142.6, 141.0, 131.6, 130.6, 129.5, 128.5, 128.1, 124.1, 120.9, 112.1, 112.0, 110.1, 104.7, 49.1, 44.3, 40.6, 36.1, 23.6, 23.6. IR (KBr):  $\nu$  ( $cm^{-1}$ ) 2965, 2885, 2799, 1673, 1608, 1521, 1396, 1352, 1165, 819. HRMS (ESI,  $m/z$ ) calcd for  $C_{31}H_{37}N_4O_2$   $[M+H]^+$ : 497.2911, found: 497.2914.

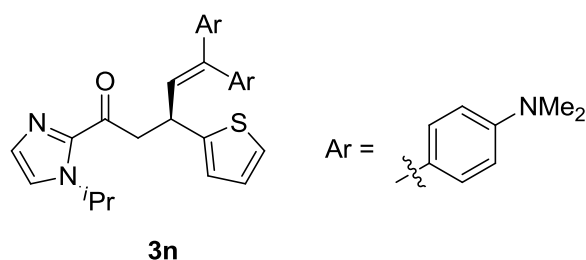

According to the general procedure C, **3n** was obtained as yellow oil, 115 mg, 90% yield, 88% ee,  $[\alpha]_D^{25} = +112.4$  ( $c = 0.5$ ,  $CHCl_3$ ); The ee was determined by HPLC (Chiralpak column IC,  $\lambda = 254$  nm, hexane/*i*-PrOH = 93/7, flow rate 1.0 mL/min,  $t_{major} = 39.94$  min,  $t_{minor} = 37.48$  min).  $^1H$  NMR (400 MHz,  $CDCl_3$ ):  $\delta = 7.20$  (s, 1H), 7.14 (s, 1H), 7.10-7.09 (m, 1H), 7.04-6.99 (m, 4H), 6.89 (t,  $J = 4.0$  Hz, 2H), 6.67 (d,  $J = 8.8$  Hz, 2H), 6.58 (d,  $J = 8.8$  Hz, 2H), 6.02 (d,  $J = 10.4$  Hz, 1H), 5.49-5.43 (m, 1H),

4.58-4.52 (m, 1H), 3.63-3.61 (m, 2H), 2.95 (s, 6H), 2.89 (s, 6H), 1.35 (d,  $J = 6.4$  Hz, 6H).  $^{13}\text{C}$  NMR (100 MHz,  $\text{CDCl}_3$ ):  $\delta = 190.8, 149.8, 149.5, 149.2, 142.6, 141.9, 131.4, 130.6, 129.5, 128.5, 128.0, 126.6, 123.2, 123.2, 121.0, 112.1, 112.0, 49.1, 47.4, 40.6, 37.5, 23.7, 23.6$ . IR (KBr):  $\nu$  ( $\text{cm}^{-1}$ ) 2964, 2884, 2799, 1672, 1608, 1521, 1395, 1353, 1256, 1164, 819. HRMS (ESI,  $m/z$ ) calcd for  $\text{C}_{31}\text{H}_{37}\text{N}_4\text{OS}$   $[\text{M}+\text{H}]^+$ : 513.2683, found: 513.2684.

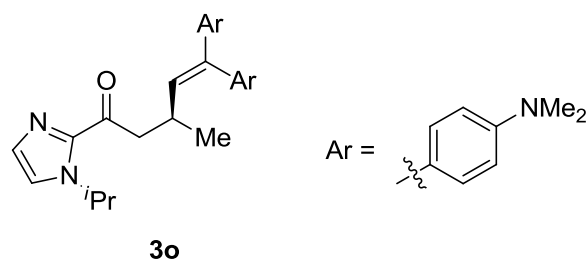

According to the general procedure C, **3o** was obtained as brown oil, 91 mg, 82% yield, 95% ee,  $[\alpha]_{\text{D}}^{25} = +69.7$  ( $c = 0.5$ ,  $\text{CHCl}_3$ ); The ee was determined by HPLC (Chiralpak column IC,  $\lambda = 254$  nm, hexane/*i*-PrOH = 92/8, flow rate 1.0 mL/min,  $t_{\text{major}} = 13.75$  min,  $t_{\text{minor}} = 21.24$  min).  $^1\text{H}$  NMR (400 MHz,  $\text{CDCl}_3$ ):  $\delta = 7.21$  (s, 1H), 7.13 (s, 1H), 7.03-6.96 (m, 4H), 6.67 (d,  $J = 8.4$  Hz, 2H), 6.58 (d,  $J = 8.4$  Hz, 2H), 5.74 (d,  $J = 8.8$  Hz, 1H), 5.52-5.47 (m, 1H), 3.18-3.11 (m, 3H), 2.95 (s, 6H), 2.90 (s, 6H), 1.38 (t,  $J = 6.0$  Hz, 6H), 1.12 (d,  $J = 5.6$  Hz, 3H).  $^{13}\text{C}$  NMR (100 MHz,  $\text{CDCl}_3$ ):  $\delta = 192.5, 149.6, 149.3, 142.8, 140.3, 132.0, 130.5, 130.4, 129.3, 128.8, 128.2, 120.8, 112.1, 112.1, 49.1, 47.2, 40.7, 31.4, 23.7, 21.8$ . IR (KBr):  $\nu$  ( $\text{cm}^{-1}$ ) 2963, 2869, 2799, 1672, 1609, 1521, 1395, 1350, 1258, 947, 818. HRMS (ESI,  $m/z$ ) calcd for  $\text{C}_{28}\text{H}_{37}\text{N}_4\text{O}$   $[\text{M}+\text{H}]^+$ : 445.2962, found: 445.2962.

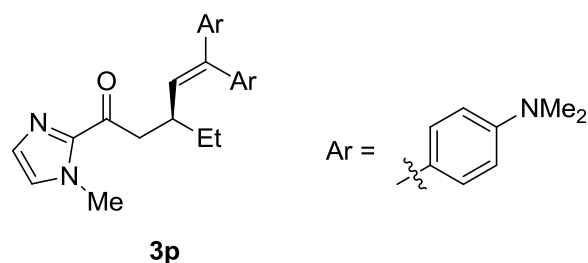

According to the general procedure C, **3p** was obtained as yellow oil, 86 mg, 80% yield, 95% ee,  $[\alpha]_{\text{D}}^{25} = +47.4$  ( $c = 0.5$ ,  $\text{CHCl}_3$ ); The ee was determined by HPLC (Chiralpak column IC,  $\lambda = 254$  nm, hexane/*i*-PrOH = 85/15, flow rate 1.0 mL/min,

$t_{\text{major}} = 11.19$  min,  $t_{\text{minor}} = 18.11$  min).  $^1\text{H}$  NMR (400 MHz,  $\text{CDCl}_3$ ):  $\delta = 7.06$  (t,  $J = 8.4$  Hz, 3H), 6.94 (d,  $J = 4.4$  Hz, 3H), 6.65 (d,  $J = 7.2$  Hz, 2H), 6.59 (d,  $J = 7.6$  Hz, 2H), 5.69 (d,  $J = 10.4$  Hz, 1H), 3.93 (s, 3H), 3.13 (d,  $J = 7.2$  Hz, 2H), 2.95 (s, 6H), 2.90 (s, 6H), 1.74 (s, 1H), 1.58-1.52 (m, 1H), 1.46-1.38 (m, 1H), 0.89 (t,  $J = 8.0$  Hz, 3H).  $^{13}\text{C}$  NMR (100 MHz,  $\text{CDCl}_3$ ):  $\delta = 192.6, 149.6, 149.2, 143.5, 141.7, 132.1, 130.5, 128.9, 128.8, 128.1, 126.7, 112.1, 112.1, 45.0, 40.7, 37.8, 36.2, 29.1, 11.9$ . IR (KBr):  $\nu$  ( $\text{cm}^{-1}$ ) 2960, 2928, 2799, 1672, 1609, 1520, 1406, 1350, 1224, 1020, 948, 819, 773. HRMS (ESI,  $m/z$ ) calcd for  $\text{C}_{27}\text{H}_{35}\text{N}_4\text{O}$   $[\text{M}+\text{H}]^+$ : 431.2805, found: 431.2808.

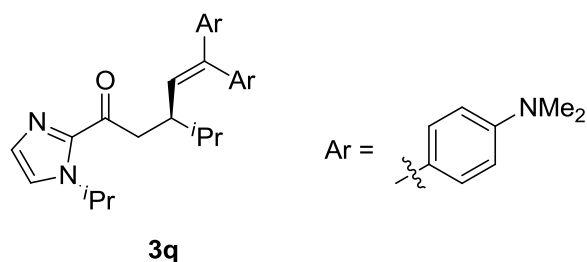

According to the general procedure C, **3q** was obtained as yellow oil, 99 mg, 84% yield, 95% ee,  $[\alpha]_{\text{D}}^{25} = +9.2$  ( $c = 0.5$ ,  $\text{CHCl}_3$ ); The ee was determined by HPLC (Chiralpak column IC,  $\lambda = 254$  nm, hexane/*i*-PrOH = 90/10, flow rate 1.0 mL/min,  $t_{\text{major}} = 8.15$  min,  $t_{\text{minor}} = 12.24$  min).  $^1\text{H}$  NMR (400 MHz,  $\text{CDCl}_3$ ):  $\delta = 7.14$  (s, 1H), 7.07 (s, 1H), 6.94 (d,  $J = 8.8$  Hz, 2H), 6.84 (d,  $J = 8.4$  Hz, 2H), 6.58 (d,  $J = 8.4$  Hz, 2H), 6.50 (d,  $J = 8.8$  Hz, 2H), 5.71 (d,  $J = 10.4$  Hz, 1H), 5.46-5.39 (m, 1H), 3.23-3.17 (m, 1H), 3.08-3.03 (m, 1H), 2.87 (s, 6H), 2.82 (s, 6H), 1.76-1.64 (m, 2H), 1.30 (t,  $J = 8.0$  Hz, 6H), 0.86 (d,  $J = 6.8$  Hz, 3H), 0.80 (d,  $J = 6.8$  Hz, 3H).  $^{13}\text{C}$  NMR (100 MHz,  $\text{CDCl}_3$ ):  $\delta = 193.1, 149.5, 149.1, 142.9, 141.9, 132.4, 130.6, 129.3, 129.0, 128.1, 127.3, 120.8, 112.1, 112.0, 49.1, 43.0, 41.9, 40.7, 40.7, 33.2, 23.7, 23.7, 20.5, 19.5$ . IR (KBr):  $\nu$  ( $\text{cm}^{-1}$ ) 2959, 2872, 2799, 1672, 1609, 1521, 1395, 1256, 1223, 1164, 818. HRMS (ESI,  $m/z$ ) calcd for  $\text{C}_{30}\text{H}_{41}\text{N}_4\text{O}$   $[\text{M}+\text{H}]^+$ : 473.3275, found: 473.3277.

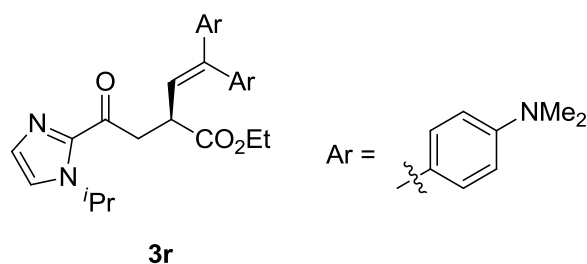



According to the general procedure C, **3r** was obtained as yellow oil, 84 mg, 67% yield, 93% ee,  $[\alpha]_{\text{D}}^{25} = +140.4$  ( $c = 0.5$ ,  $\text{CHCl}_3$ ); The ee was determined by HPLC (Chiralpak column IC,  $\lambda = 254$  nm, hexane/*i*-PrOH = 90/10, flow rate 1.0 mL/min,  $t_{\text{major}} = 45.46$  min,  $t_{\text{minor}} = 61.38$  min).  $^1\text{H}$  NMR (400 MHz,  $\text{CDCl}_3$ ):  $\delta = 7.21$  (s, 1H), 7.17-7.10 (m, 5H), 6.71 (d,  $J = 8.8$  Hz, 2H), 6.61 (d,  $J = 8.8$  Hz, 2H), 5.84 (d,  $J = 10.4$  Hz, 1H), 5.49-5.43 (m, 1H), 4.21-4.13 (m, 2H), 3.88-3.82 (m, 1H), 3.78-3.72 (m, 1H), 3.38-3.32 (m, 1H), 2.96 (s, 6H), 2.92 (s, 6H), 1.40-1.35 (m, 6H), 1.26 (t,  $J = 7.2$  Hz, 3H).  $^{13}\text{C}$  NMR (100 MHz,  $\text{CDCl}_3$ ):  $\delta = 190.5$ , 174.3, 149.9, 149.6, 144.5, 142.0, 131.2, 130.8, 129.5, 128.5, 127.7, 120.9, 112.1, 112.0, 60.7, 49.1, 42.8, 41.8, 40.6, 40.6, 23.7, 23.5, 14.2. IR (KBr):  $\nu$  ( $\text{cm}^{-1}$ ) 2979, 2934, 2887, 2801, 1729, 1677, 1522, 1397, 1360, 978, 948, 821. HRMS (ESI,  $m/z$ ) calcd for  $\text{C}_{30}\text{H}_{39}\text{N}_4\text{O}_3$   $[\text{M}+\text{H}]^+$ : 503.3017, found: 503.3015.

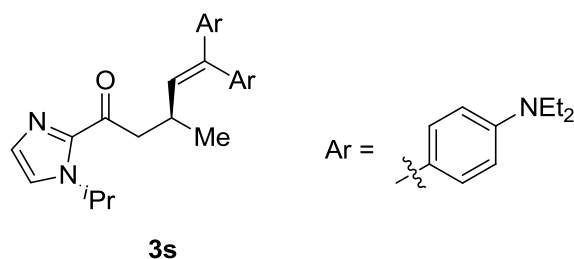

According to the general procedure C, **3s** was obtained as yellow oil, 100 mg, 80% yield, 95% ee,  $[\alpha]_{\text{D}}^{25} = +67.3$  ( $c = 0.5$ ,  $\text{CHCl}_3$ ); The ee was determined by HPLC (Chiralpak column IC,  $\lambda = 254$  nm, hexane/*i*-PrOH = 93/7, flow rate 1.0 mL/min,  $t_{\text{major}} = 8.76$  min,  $t_{\text{minor}} = 14.65$  min).  $^1\text{H}$  NMR (400 MHz,  $\text{CDCl}_3$ ):  $\delta = 7.21$  (s, 1H), 7.13 (s, 1H), 7.02 (d,  $J = 8.8$  Hz, 2H), 6.94 (d,  $J = 8.4$  Hz, 2H), 6.60 (d,  $J = 8.4$  Hz, 2H), 6.53 (d,  $J = 8.8$  Hz, 2H), 5.71-5.67 (m, 1H), 5.53-5.46 (m, 1H), 3.37-3.28 (m, 8H), 3.14 (s, 3H), 1.38 (t,  $J = 7.2$  Hz, 6H), 1.19-1.10 (m, 15H).  $^{13}\text{C}$  NMR (100 MHz,  $\text{CDCl}_3$ ):  $\delta = 192.6$ , 146.7, 146.5, 142.8, 140.4, 130.9, 130.7, 129.7, 129.3, 128.4, 127.7, 120.7, 111.2, 49.1, 47.3, 44.3, 44.3, 31.4, 23.7, 21.9, 12.8, 12.6. IR (KBr):  $\nu$  ( $\text{cm}^{-1}$ ) 2968, 2928, 2870, 1673, 1608, 1519, 1397, 1263, 1196, 815. HRMS (ESI,  $m/z$ ) calcd for  $\text{C}_{32}\text{H}_{45}\text{N}_4\text{O}$   $[\text{M}+\text{H}]^+$ : 501.3588, found: 501.3592.

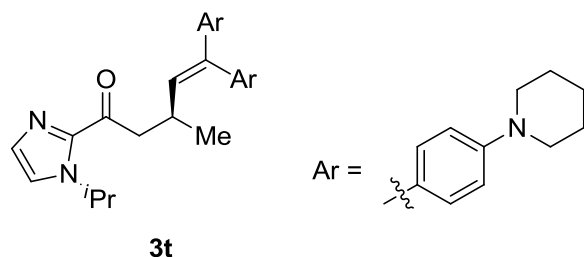

According to the general procedure C, **3t** was obtained as yellow oil, 111 mg, 85% yield, 95% ee,  $[\alpha]_{\text{D}}^{25} = + 50.7$  ( $c = 0.5$ ,  $\text{CHCl}_3$ ); The ee was determined by HPLC (Chiralpak column IC,  $\lambda = 254$  nm, hexane/*i*-PrOH = 90/10, flow rate 1.0 mL/min,  $t_{\text{major}} = 8.55$  min,  $t_{\text{minor}} = 13.40$  min).  $^1\text{H}$  NMR (400 MHz,  $\text{CDCl}_3$ ):  $\delta = 7.22$  (s, 1H), 7.13 (s, 1H), 7.02-6.95 (m, 4H), 6.87 (d,  $J = 8.4$  Hz, 2H), 6.77 (d,  $J = 8.4$  Hz, 2H), 5.78 (d,  $J = 9.6$  Hz, 1H), 5.52-5.45 (m, 1H), 3.18-3.10 (m, 11H), 1.72-1.55 (m, 12H), 1.38 (t,  $J = 8.0$  Hz, 6H), 1.11 (d,  $J = 6.4$  Hz, 3H).  $^{13}\text{C}$  NMR ( $\text{CDCl}_3$ , 100 MHz):  $\delta = 192.4$ , 151.1, 150.7, 142.7, 140.1, 134.1, 131.2, 131.1, 130.4, 129.3, 128.0, 120.8, 115.8, 115.8, 50.6, 50.5, 49.1, 47.2, 31.4, 26.0, 25.8, 24.4, 24.3, 23.7, 21.7. IR (KBr):  $\nu$  ( $\text{cm}^{-1}$ ) 2928, 2851, 2806, 1672, 1607, 1514, 1260, 1234, 916, 822. HRMS (ESI,  $m/z$ ) calcd for  $\text{C}_{34}\text{H}_{44}\text{N}_4\text{NaO}$   $[\text{M}+\text{Na}]^+$ : 547.3407, found: 547.3401.

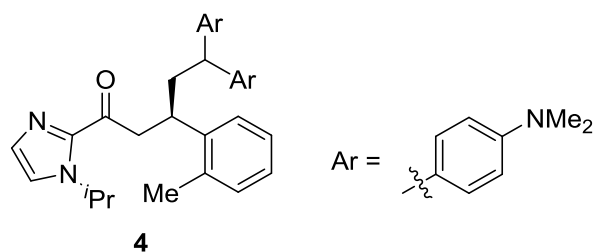

According to the general procedure D, **4** was obtained as yellow oil, 112 mg, 86% yield, > 99% ee,  $[\alpha]_{\text{D}}^{25} = - 7.7$  ( $c = 0.5$ ,  $\text{CHCl}_3$ ); The ee was determined by HPLC (Chiralpak column IC,  $\lambda = 254$  nm, hexane/*i*-PrOH = 85/15, flow rate 1.0 mL/min,  $t_{\text{major}} = 16.15$  min,  $t_{\text{minor}} = 9.47$  min).  $^1\text{H}$  NMR (400 MHz,  $\text{CDCl}_3$ ):  $\delta = 7.31$  (d,  $J = 7.6$  Hz, 1H), 7.18-7.10 (m, 3H), 7.04-6.97 (m, 6H), 6.67 (d,  $J = 8.8$  Hz, 2H), 6.61 (d,  $J = 8.8$  Hz, 2H), 5.44-5.37 (m, 1H), 3.60-3.51 (m, 2H), 3.47-3.46 (m, 2H), 2.89 (s, 6H), 2.85 (s, 6H), 2.48-2.41 (m, 1H), 2.31-2.24 (m, 1H), 1.91 (s, 3H), 1.36 (d,  $J = 6.8$  Hz, 3H), 1.30 (d,  $J = 6.8$  Hz, 3H).  $^{13}\text{C}$  NMR (100 MHz,  $\text{CDCl}_3$ ):  $\delta = 192.0$ , 149.0, 148.9, 142.8, 142.6, 136.6, 134.9, 132.8, 130.1, 129.3, 128.7, 128.1, 126.1, 125.6, 120.8,

113.1, 113.0, 48.9, 46.5, 42.5, 40.9, 23.7, 23.5, 19.5. IR (KBr):  $\nu$  (cm<sup>-1</sup>) 2963, 2924, 2799, 1674, 1614, 1518, 1261, 1089, 1021, 947, 806. HRMS (ESI, m/z) calcd for C<sub>34</sub>H<sub>42</sub>N<sub>4</sub>NaO [M+Na]<sup>+</sup>: 545.3251, found: 545.3250.

### III References

- (1) (a) Wang, C.; Chen, L.-A.; Huo, H.; Shen, X.; Harms, K.; Gong, L.; Meggers, E. *Chem. Sci.* **2015**, *6*, 1094. (b) Li, S.-W.; Gong, J.; Kang, Q. *Org. Lett.* **2017**, *19*, 1350.
- (2) Cui, L.; Zhang, L.; Luo, S.; Cheng, J.-P. *Eur. J. Org. Chem.* **2014**, 3540.
- (3) (a) Yoshida, K.; Koujiri, T.; Sakamoto, E.; Kubo, Y. *Bull. Chem. Soc. Jpn.* **1990**, *63*, 1748. (b) Liwosz, T. W.; Chemler, S. R. *Chem. – Eur. J.* **2013**, *19*, 12771.
- (4) (a) Huo, H.; Fu, C.; Harms, K.; Meggers, E. *J. Am. Chem. Soc.* **2014**, *136*, 2990.
- (b) Huo, H.; Harms, K.; Meggers, E. *J. Am. Chem. Soc.* **2016**, *138*, 6936. (c) Evans, D. A.; Fandrick, K. R. *Org. Lett.* **2006**, *8*, 2249.

## IV chiral HPLC analysis

Racemic **3a**:

### <Chromatogram>

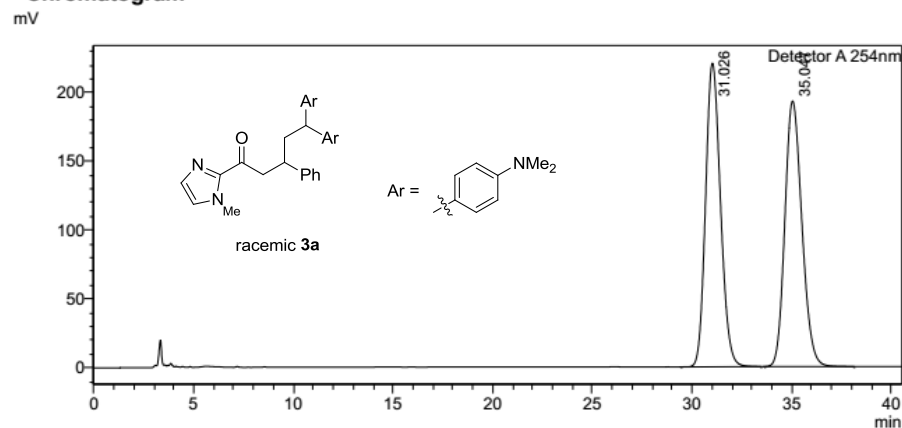

### <Peak Table>

Detector A 254nm

| Peak# | Ret. Time | Area     | Height | Conc.  | Unit | Mark | Name |
|-------|-----------|----------|--------|--------|------|------|------|
| 1     | 31.026    | 11471084 | 220600 | 50.051 |      | M    |      |
| 2     | 35.047    | 11447712 | 192917 | 49.949 |      | M    |      |
| Total |           | 22918796 | 413518 |        |      |      |      |

Chiral **3a**:

### <Chromatogram>

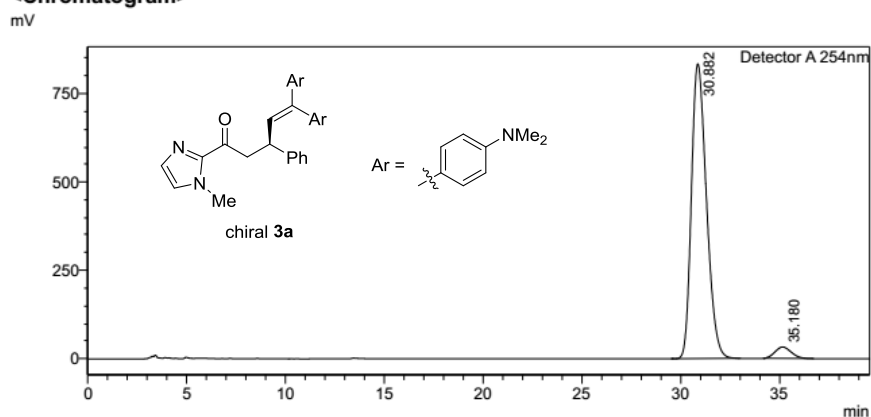

### <Peak Table>

Detector A 254nm

| Peak# | Ret. Time | Area     | Height | Conc.  | Unit | Mark | Name |
|-------|-----------|----------|--------|--------|------|------|------|
| 1     | 30.882    | 44136993 | 833581 | 96.018 |      | M    |      |
| 2     | 35.180    | 1830412  | 31969  | 3.982  |      | M    |      |
| Total |           | 45967406 | 865550 |        |      |      |      |

**Figure S1.** HPLC traces of racemic **3a** (reference) and chiral **3a**. Area integration = 96.0:4.0 (92%

ee)

### Racemic **3b**:

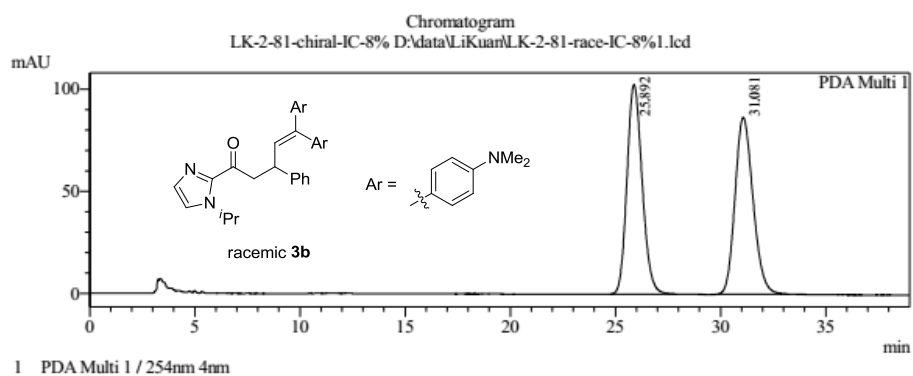

PeakTable

PDA Ch1 254nm 4nm

| Peak# | Name     | Ret. Time | Area     | Height | Area %  | Resolution |
|-------|----------|-----------|----------|--------|---------|------------|
| 1     | RT25.892 | 25.892    | 5158742  | 102749 | 50.025  | 0.000      |
| 2     | RT31.081 | 31.081    | 5153590  | 86687  | 49.975  | 3.595      |
| Total |          |           | 10312332 | 189436 | 100.000 |            |

### Chiral **3b**:

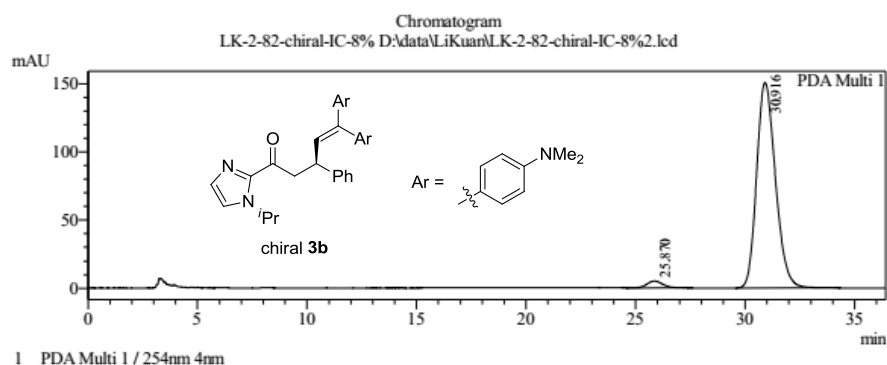

PeakTable

PDA Ch1 254nm 4nm

| Peak# | Name     | Ret. Time | Area    | Height | Area %  | Resolution |
|-------|----------|-----------|---------|--------|---------|------------|
| 1     | RT25.870 | 25.870    | 252998  | 5018   | 2.733   | 0.000      |
| 2     | RT30.916 | 30.916    | 9005267 | 150833 | 97.267  | 3.506      |
| Total |          |           | 9258266 | 155851 | 100.000 |            |

**Figure S2.** HPLC traces of racemic **3b** (reference) and chiral **3b**. Area integration = 2.7:97.3 (95% ee)

### Racemic **3c**:

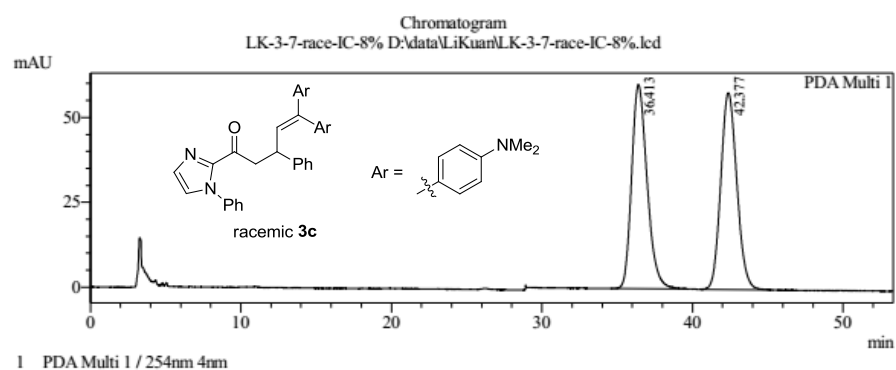

PeakTable

| Peak# | Name | Ret. Time | Area    | Height | Area %  | Resolution |
|-------|------|-----------|---------|--------|---------|------------|
| 1     |      | 36.413    | 4298188 | 60151  | 49.984  | 0.000      |
| 2     |      | 42.377    | 4300944 | 58034  | 50.016  | 3.132      |
| Total |      |           | 8599132 | 118185 | 100.000 |            |

### Chiral **3c**:

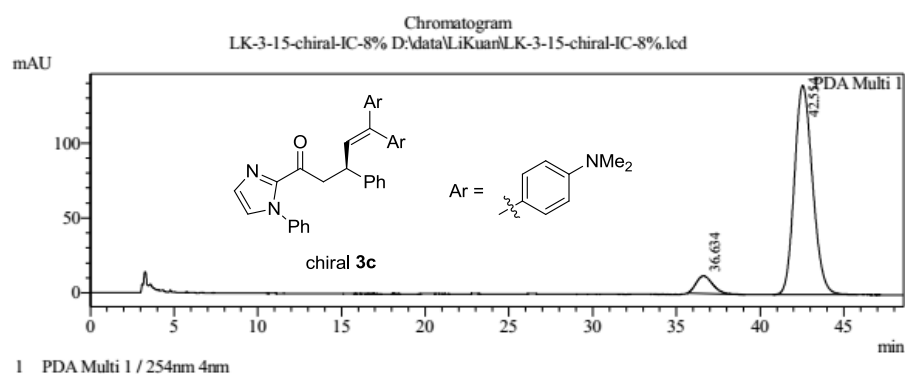

PeakTable

| Peak# | Name | Ret. Time | Area     | Height | Area %  | Resolution |
|-------|------|-----------|----------|--------|---------|------------|
| 1     |      | 36.634    | 812825   | 11858  | 7.165   | 0.000      |
| 2     |      | 42.554    | 10531151 | 139535 | 92.835  | 3.094      |
| Total |      |           | 11343975 | 151393 | 100.000 |            |

**Figure S3.** HPLC traces of racemic **3c** (reference) and chiral **3c**. Area integration = 7.2:92.8 (86% ee)

## Racemic **3d**

### <Chromatogram>

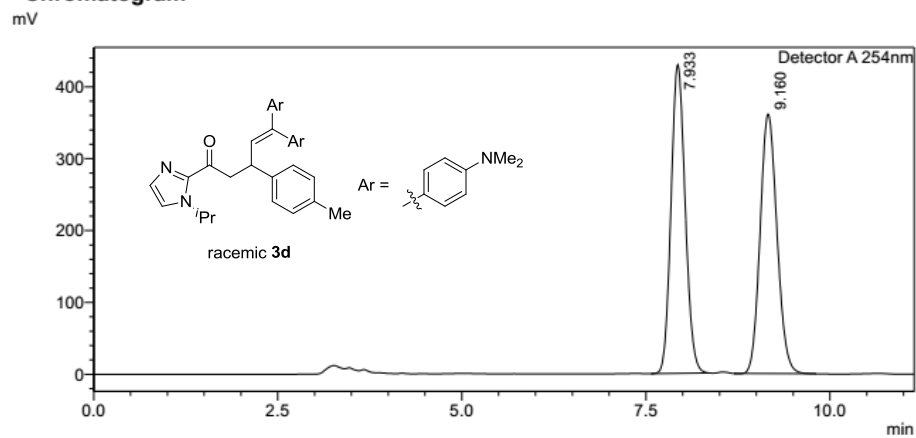

### <Peak Table>

| Detector A 254nm |           |          |        |        |      |      |
|------------------|-----------|----------|--------|--------|------|------|
| Peak#            | Ret. Time | Area     | Height | Conc.  | Unit | Mark |
| 1                | 7.933     | 5742482  | 429371 | 49.919 |      | M    |
| 2                | 9.160     | 5761158  | 361255 | 50.081 |      | M    |
| Total            |           | 11503640 | 790626 |        |      |      |

## Chiral **3d**:

### <Chromatogram>

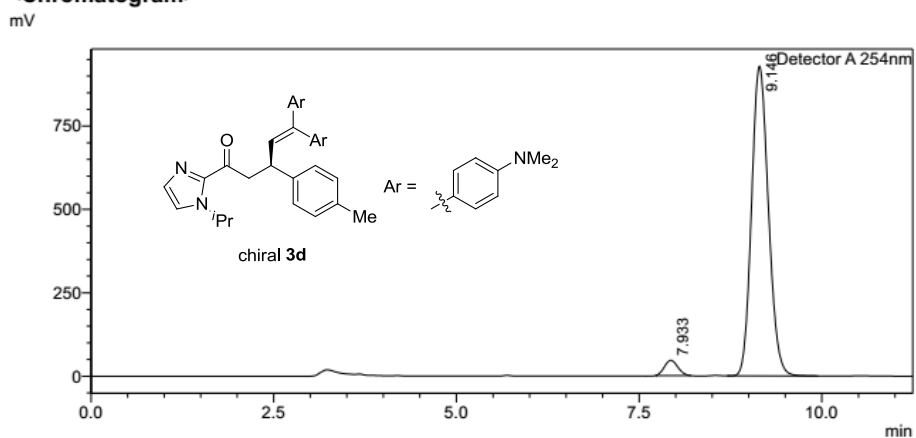

### <Peak Table>

| Detector A 254nm |           |          |        |        |      |      |
|------------------|-----------|----------|--------|--------|------|------|
| Peak#            | Ret. Time | Area     | Height | Conc.  | Unit | Mark |
| 1                | 7.933     | 574234   | 45319  | 3.710  |      | M    |
| 2                | 9.146     | 14905218 | 928059 | 96.290 |      | M    |
| Total            |           | 15479451 | 973378 |        |      |      |

**Figure S4.** HPLC traces of racemic **3d** (reference) and chiral **3d**. Area integration = 3.7:96.3 (93% ee)



## Racemic **3e**

### <Chromatogram>

mV

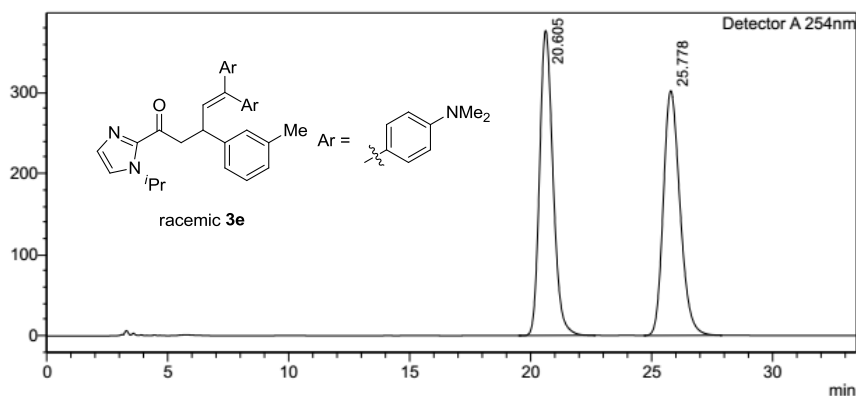

### <Peak Table>

Detector A 254nm

| Peak# | Ret. Time | Area     | Height | Conc.  | Unit | Mark | Name |
|-------|-----------|----------|--------|--------|------|------|------|
| 1     | 20.605    | 14436624 | 375609 | 50.033 |      | M    |      |
| 2     | 25.778    | 14417387 | 301333 | 49.967 |      | M    |      |
| Total |           | 28854011 | 676941 |        |      |      |      |

## Chiral **3e**:

### <Chromatogram>

mV

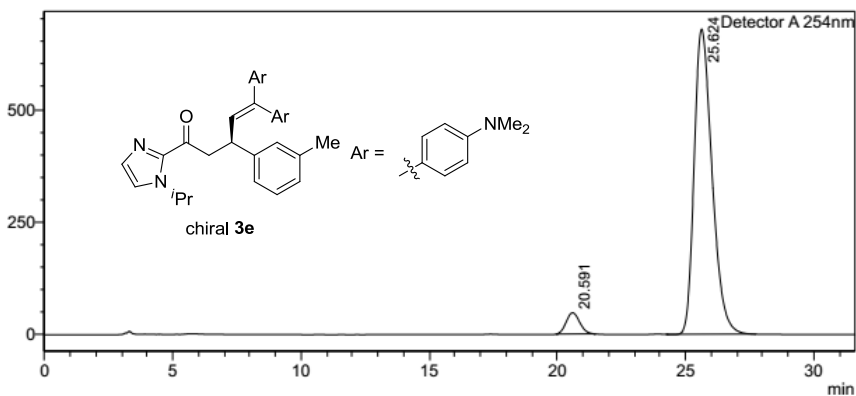

### <Peak Table>

Detector A 254nm

| Peak# | Ret. Time | Area     | Height | Conc.  | Unit | Mark | Name |
|-------|-----------|----------|--------|--------|------|------|------|
| 1     | 20.591    | 1724772  | 47213  | 4.989  |      | M    |      |
| 2     | 25.624    | 32846353 | 677319 | 95.011 |      | M    |      |
| Total |           | 34571125 | 724532 |        |      |      |      |

**Figure S8.** HPLC traces of racemic **3e** (reference) and chiral **3e**. Area integration = 5.0:95.0 (90% ee)

## Racemic **3f**

### <Chromatogram>

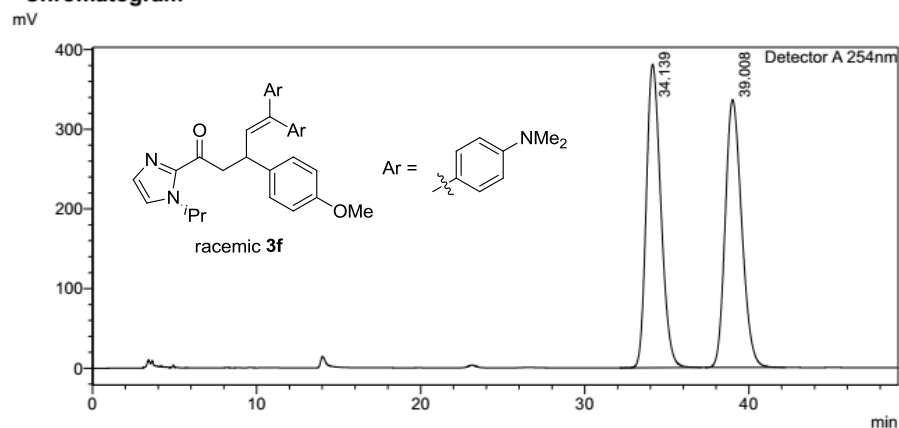

### <Peak Table>

| Peak# | Ret. Time | Area     | Height | Conc.  | Unit | Mark | Name |
|-------|-----------|----------|--------|--------|------|------|------|
| 1     | 34.139    | 23388878 | 380735 | 50.020 |      | M    |      |
| 2     | 39.008    | 23369871 | 336021 | 49.980 |      | M    |      |
| Total |           | 46758748 | 716756 |        |      |      |      |

## Chiral **3f**:

### <Chromatogram>

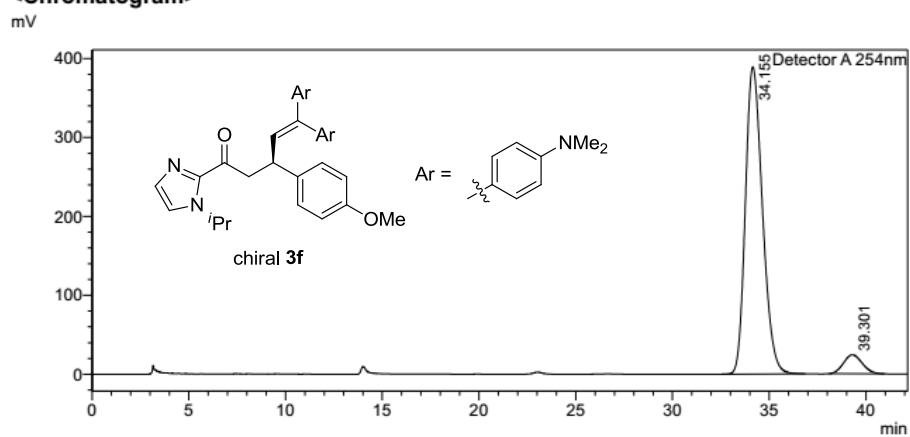

### <Peak Table>

| Peak# | Ret. Time | Area     | Height | Conc.  | Unit | Mark | Name |
|-------|-----------|----------|--------|--------|------|------|------|
| 1     | 34.155    | 23859196 | 389112 | 93.681 |      | M    |      |
| 2     | 39.301    | 1609456  | 23921  | 6.319  |      | M    |      |
| Total |           | 25468652 | 413033 |        |      |      |      |

**Figure S10.** HPLC traces of racemic **3f** (reference) and chiral **3f**. Area integration = 93.7:6.3 (87%

ee)

## Racemic **3g**

### <Chromatogram>

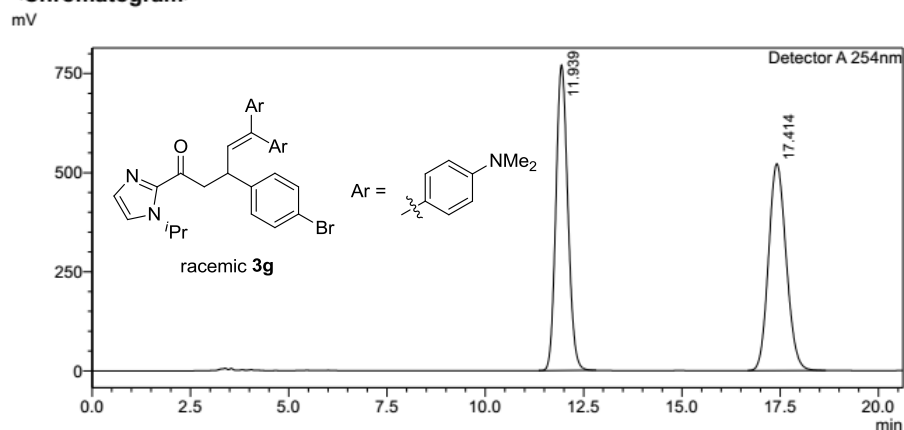

### <Peak Table>

| Detector A 254nm |           |          |         |        |      |      |      |
|------------------|-----------|----------|---------|--------|------|------|------|
| Peak#            | Ret. Time | Area     | Height  | Conc.  | Unit | Mark | Name |
| 1                | 11.939    | 16238501 | 770668  | 49.919 |      | M    |      |
| 2                | 17.414    | 16291424 | 521471  | 50.081 |      | M    |      |
| Total            |           | 32529926 | 1292138 |        |      |      |      |

## Chiral **3g**:

### <Chromatogram>

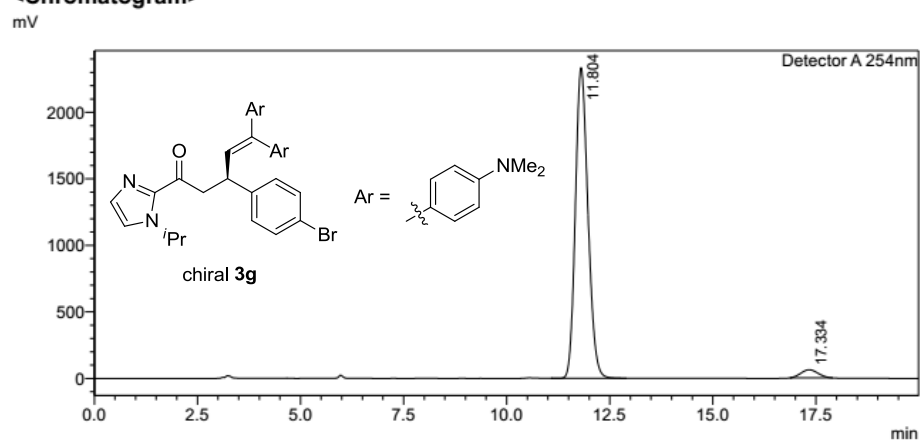

### <Peak Table>

| Detector A 254nm |           |          |         |        |      |      |      |
|------------------|-----------|----------|---------|--------|------|------|------|
| Peak#            | Ret. Time | Area     | Height  | Conc.  | Unit | Mark | Name |
| 1                | 11.804    | 49567387 | 2331849 | 96.581 |      | M    |      |
| 2                | 17.334    | 1754480  | 60856   | 3.419  |      | M    |      |
| Total            |           | 51321867 | 2392705 |        |      |      |      |

**Figure S5.** HPLC traces of racemic **3g** (reference) and chiral **3g**. Area integration = 96.6:3.4 (93% ee)

## Racemic **3h**

### <Chromatogram>

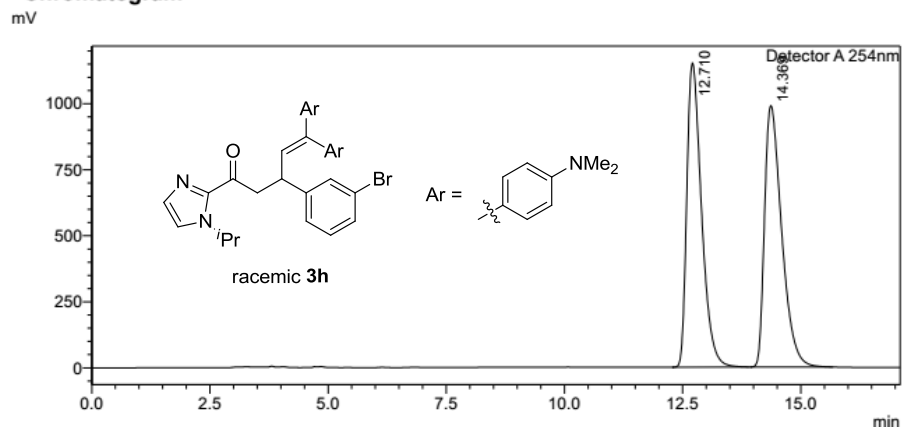

### <Peak Table>

| Peak# | Ret. Time | Area     | Height  | Conc.  | Unit | Mark | Name |
|-------|-----------|----------|---------|--------|------|------|------|
| 1     | 12.710    | 24907293 | 1151446 | 49.969 |      | M    |      |
| 2     | 14.369    | 24938439 | 989683  | 50.031 |      | M    |      |
| Total |           | 49845732 | 2141129 |        |      |      |      |

## Chiral **3h**:

### <Chromatogram>

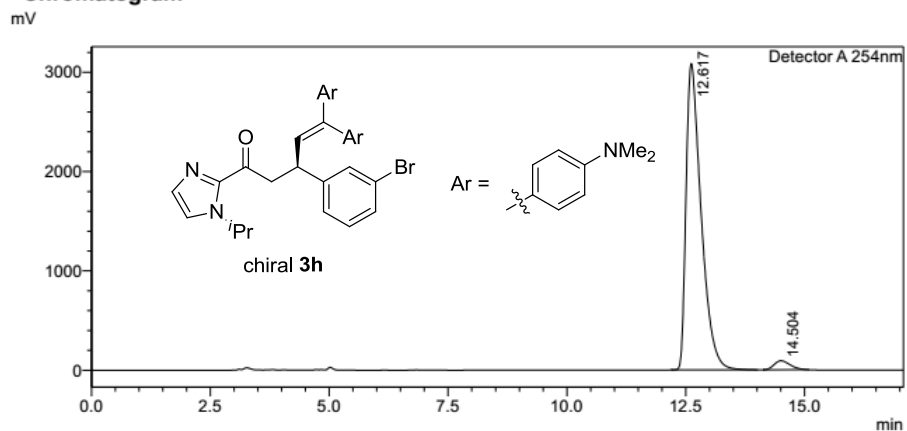

### <Peak Table>

| Peak# | Ret. Time | Area     | Height  | Conc.  | Unit | Mark | Name |
|-------|-----------|----------|---------|--------|------|------|------|
| 1     | 12.617    | 68004053 | 3081945 | 96.992 |      | M    |      |
| 2     | 14.504    | 2109192  | 90576   | 3.008  |      | M    |      |
| Total |           | 70113245 | 3172521 |        |      |      |      |

**Figure S6.** HPLC traces of racemic **3h** (reference) and chiral **3h**. Area integration = 97.0:3.0 (94% ee)

## Racemic **3i**

### <Chromatogram>

mV

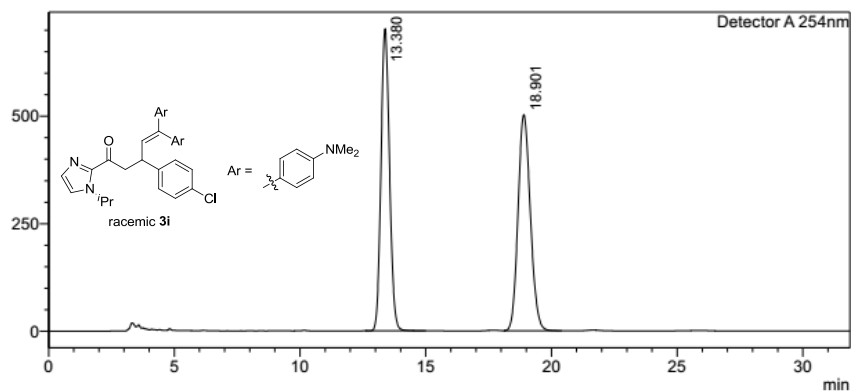

### <Peak Table>

Detector A 254nm

| Peak# | Ret. Time | Area     | Height  | Conc.  | Unit | Mark | Name |
|-------|-----------|----------|---------|--------|------|------|------|
| 1     | 13.380    | 16610241 | 702389  | 49.259 |      | M    |      |
| 2     | 18.901    | 17110307 | 502716  | 50.741 |      | M    |      |
| Total |           | 33720548 | 1205105 |        |      |      |      |

## Chiral **3i**:

### <Chromatogram>

mV

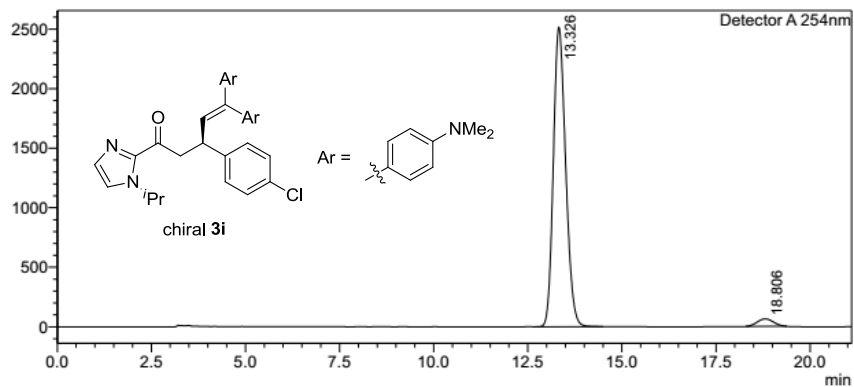

### <Peak Table>

Detector A 254nm

| Peak# | Ret. Time | Area     | Height  | Conc.  | Unit | Mark | Name |
|-------|-----------|----------|---------|--------|------|------|------|
| 1     | 13.326    | 57214129 | 2514461 | 96.839 |      | M    |      |
| 2     | 18.806    | 1867287  | 62448   | 3.161  |      | M    |      |
| Total |           | 59081417 | 2576909 |        |      |      |      |

**Figure S7.** HPLC traces of racemic **3i** (reference) and chiral **3i**. Area integration = 96.8:3.2 (94% ee)

## Racemic **3j**

### <Chromatogram>

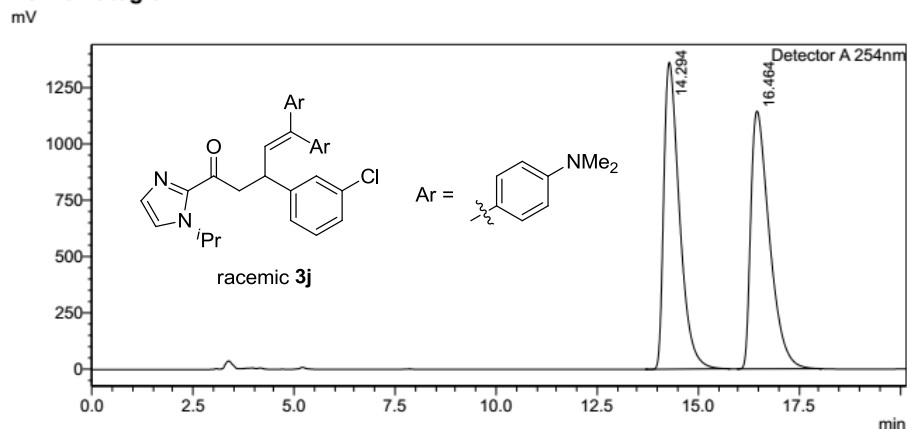

### <Peak Table>

| Detector A 254nm |           |          |         |        |      |      |      |
|------------------|-----------|----------|---------|--------|------|------|------|
| Peak#            | Ret. Time | Area     | Height  | Conc.  | Unit | Mark | Name |
| 1                | 14.294    | 36600151 | 1358023 | 50.001 |      | M    |      |
| 2                | 16.464    | 36598569 | 1140747 | 49.999 |      | M    |      |
| Total            |           | 73198720 | 2498770 |        |      |      |      |

## Chiral **3j**:

### <Chromatogram>

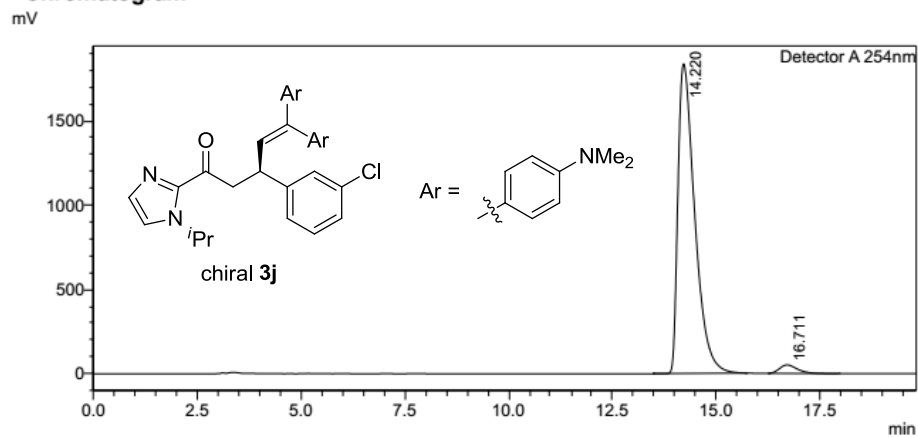

### <Peak Table>

| Detector A 254nm |           |          |         |        |      |      |      |
|------------------|-----------|----------|---------|--------|------|------|------|
| Peak#            | Ret. Time | Area     | Height  | Conc.  | Unit | Mark | Name |
| 1                | 14.220    | 51656131 | 1835955 | 97.185 |      | M    |      |
| 2                | 16.711    | 1495986  | 49831   | 2.815  |      | M    |      |
| Total            |           | 53152117 | 1885787 |        |      |      |      |

**Figure S9.** HPLC traces of racemic **3j** (reference) and chiral **3j**. Area integration = 97.2:2.8 (94% ee)

## Racemic **3k**

### <Chromatogram>

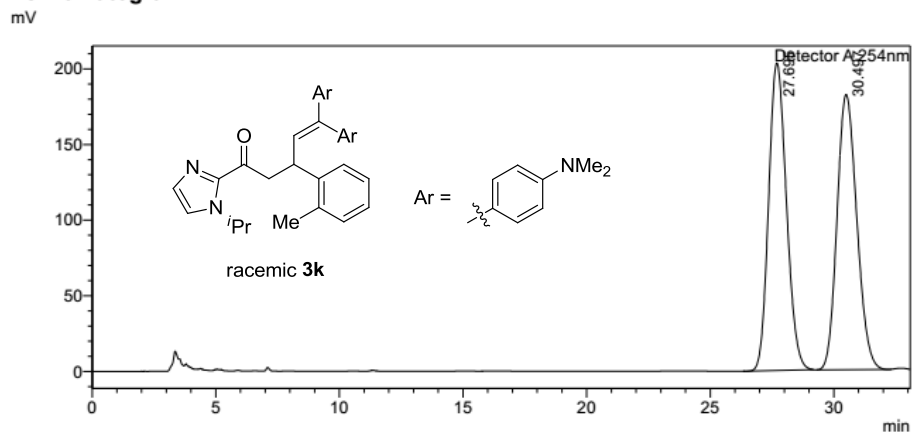

### <Peak Table>

| Detector A 254nm |           |          |        |        |      |      |
|------------------|-----------|----------|--------|--------|------|------|
| Peak#            | Ret. Time | Area     | Height | Conc.  | Unit | Mark |
| 1                | 27.695    | 10165174 | 203218 | 50.132 |      | M    |
| 2                | 30.497    | 10111628 | 181874 | 49.868 |      | M    |
| Total            |           | 20276802 | 385092 |        |      |      |

## Chiral **3k**:

### <Chromatogram>

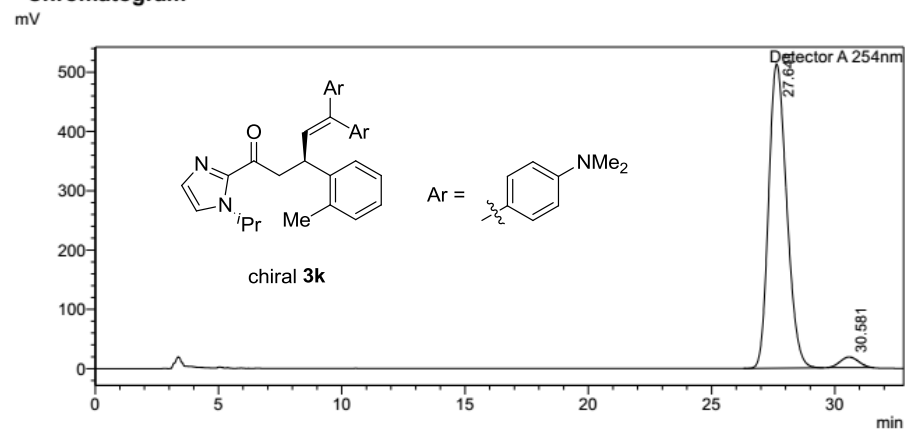

### <Peak Table>

| Detector A 254nm |           |          |        |        |      |      |
|------------------|-----------|----------|--------|--------|------|------|
| Peak#            | Ret. Time | Area     | Height | Conc.  | Unit | Mark |
| 1                | 27.641    | 26134743 | 512984 | 96.575 |      | M    |
| 2                | 30.581    | 926993   | 17882  | 3.425  |      | M    |
| Total            |           | 27061736 | 530866 |        |      |      |

**Figure S11.** HPLC traces of racemic **3k** (reference) and chiral **3k**. Area integration = 96.6:3.4 (93% ee)

## Racemic **3I**

### <Chromatogram>

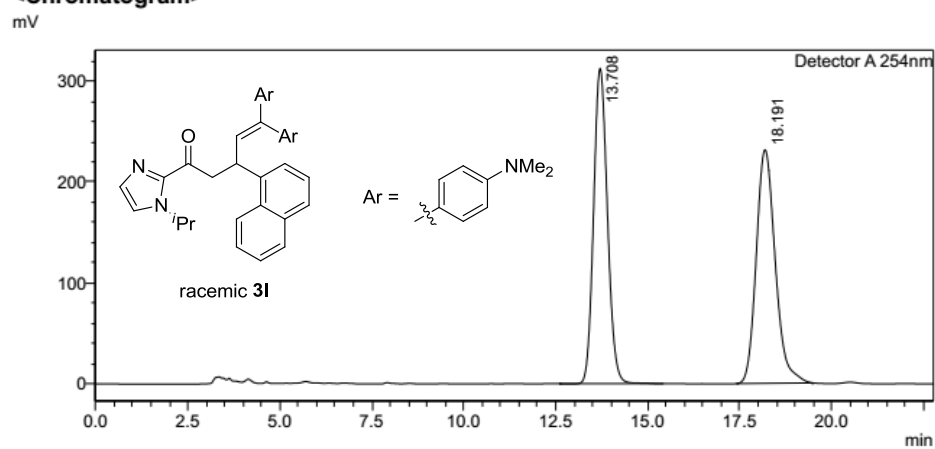

### <Peak Table>

| Detector A 254nm |           |          |        |        |      |      |      |
|------------------|-----------|----------|--------|--------|------|------|------|
| Peak#            | Ret. Time | Area     | Height | Conc.  | Unit | Mark | Name |
| 1                | 13.708    | 8161054  | 312519 | 49.576 |      | M    |      |
| 2                | 18.191    | 8300508  | 231416 | 50.424 |      | M    |      |
| Total            |           | 16461562 | 543935 |        |      |      |      |

## Chiral **3I**:

### <Chromatogram>

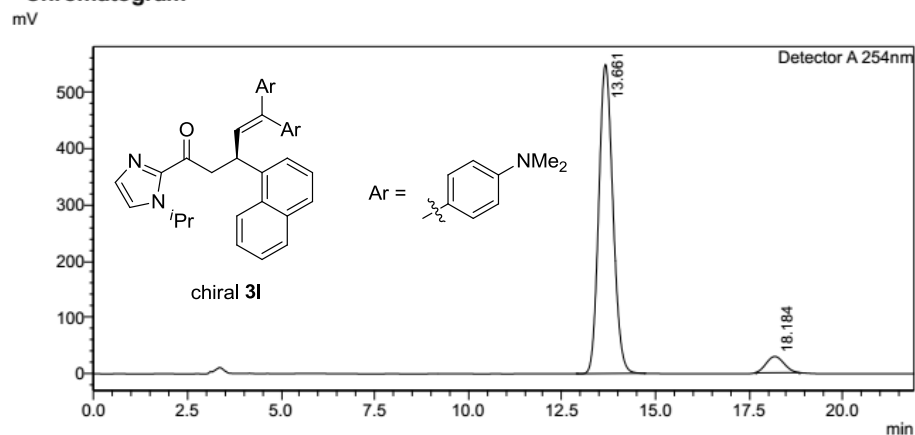

### <Peak Table>

| Detector A 254nm |           |          |        |        |      |      |      |
|------------------|-----------|----------|--------|--------|------|------|------|
| Peak#            | Ret. Time | Area     | Height | Conc.  | Unit | Mark | Name |
| 1                | 13.661    | 14436060 | 549110 | 93.791 |      | M    |      |
| 2                | 18.184    | 955633   | 28917  | 6.209  |      | M    |      |
| Total            |           | 15391694 | 578027 |        |      |      |      |

**Figure S14.** HPLC traces of racemic **3I** (reference) and chiral **3I**. Area integration = 93.8:6.2 (88% ee)



## Racemic **3m**

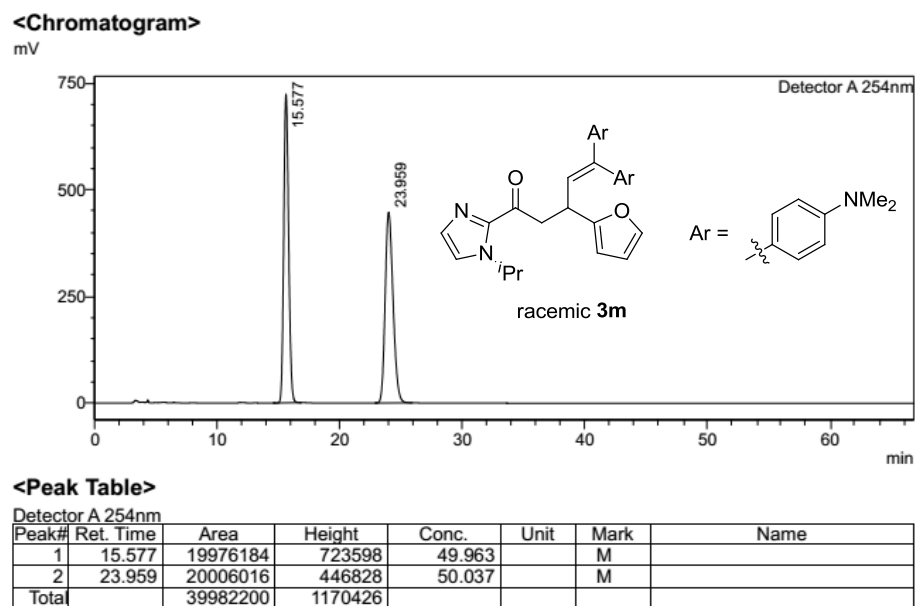

## Chiral **3m**:

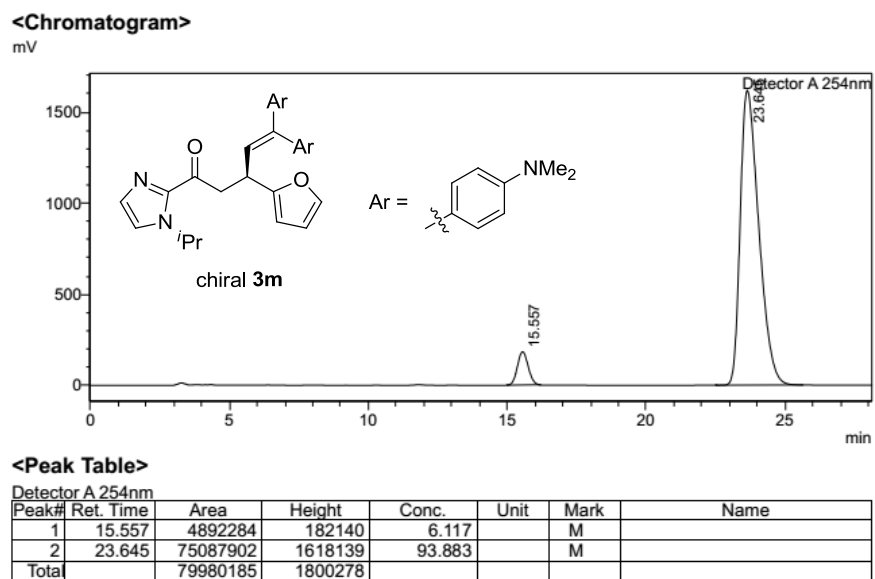

**Figure S12.** HPLC traces of racemic **3m** (reference) and chiral **3m**. Area integration = 6.1:93.9 (88% ee)

## Racemic **3n**

### <Chromatogram>

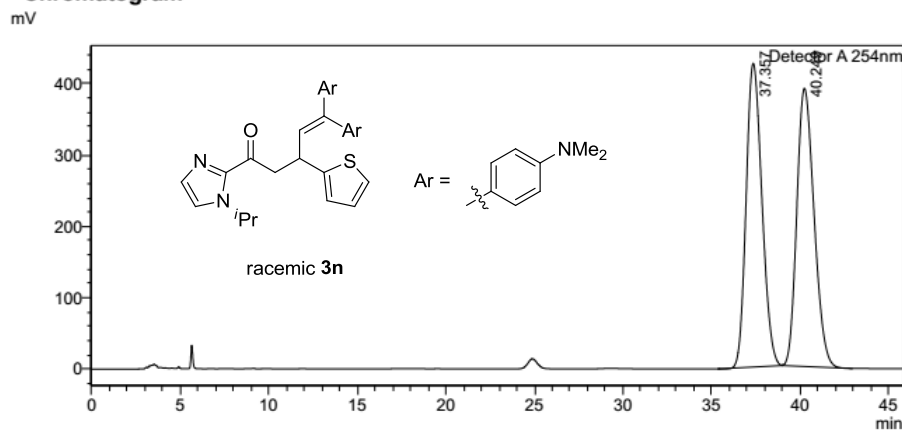

### <Peak Table>

Detector A 254nm

| Peak# | Ret. Time | Area     | Height | Conc.  | Unit | Mark | Name |
|-------|-----------|----------|--------|--------|------|------|------|
| 1     | 37.357    | 26334923 | 425916 | 49.960 |      | M    |      |
| 2     | 40.249    | 26376910 | 389878 | 50.040 |      | M    |      |
| Total |           | 52711832 | 815794 |        |      |      |      |

## Chiral **3n**:

### <Chromatogram>

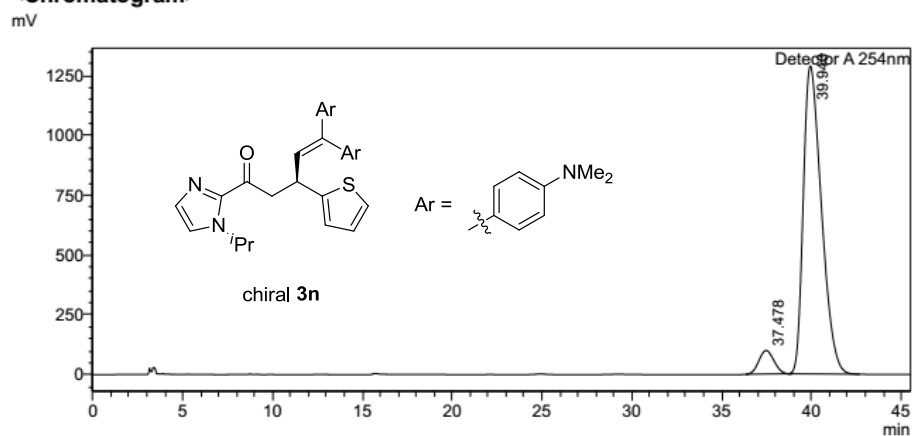

### <Peak Table>

Detector A 254nm

| Peak# | Ret. Time | Area     | Height  | Conc.  | Unit | Mark | Name |
|-------|-----------|----------|---------|--------|------|------|------|
| 1     | 37.478    | 5743408  | 98810   | 5.973  |      | M    |      |
| 2     | 39.940    | 90415041 | 1287675 | 94.027 |      | M    |      |
| Total |           | 96158450 | 1386485 |        |      |      |      |

**Figure S13.** HPLC traces of racemic **3n** (reference) and chiral **3n**. Area integration = 6.0:94.0

(88% ee)

## Racemic **3o**

### <Chromatogram>

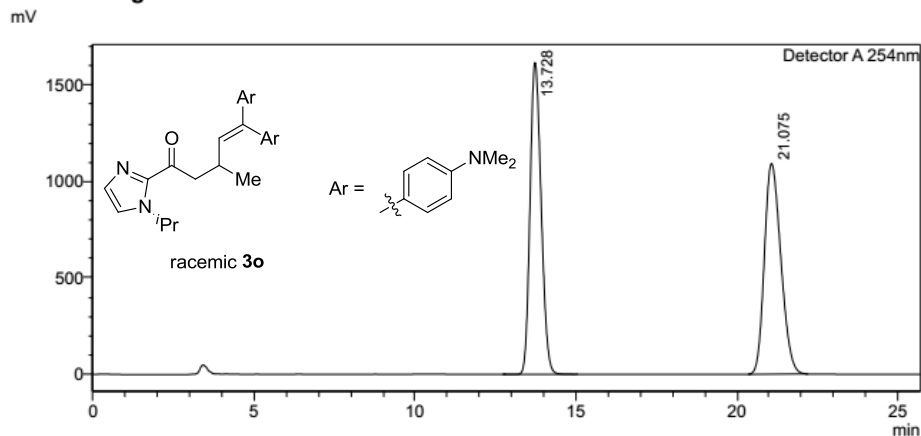

### <Peak Table>

Detector A 254nm

| Peak# | Ret. Time | Area     | Height  | Conc.  | Unit | Mark | Name |
|-------|-----------|----------|---------|--------|------|------|------|
| 1     | 13.728    | 38732562 | 1617038 | 49.919 |      | M    |      |
| 2     | 21.075    | 38857741 | 1092368 | 50.081 |      | M    |      |
| Total |           | 77590303 | 2709406 |        |      |      |      |

## Chiral **3o**:

### <Chromatogram>

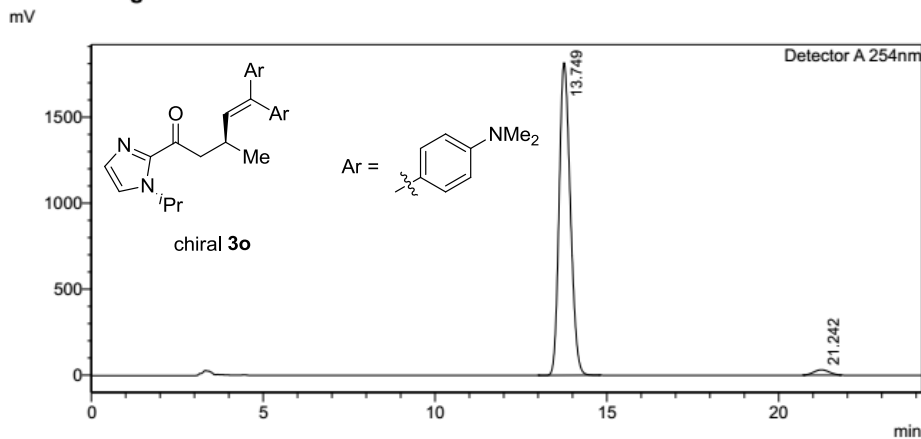

### <Peak Table>

Detector A 254nm

| Peak# | Ret. Time | Area     | Height  | Conc.  | Unit | Mark | Name |
|-------|-----------|----------|---------|--------|------|------|------|
| 1     | 13.749    | 41014903 | 1809850 | 97.688 |      | M    |      |
| 2     | 21.242    | 970784   | 30925   | 2.312  |      | M    |      |
| Total |           | 41985687 | 1840774 |        |      |      |      |

**Figure S17.** HPLC traces of racemic **3o** (reference) and chiral **3o**. Area integration = 97.7:2.3 (95% ee)

## Racemic **3p**

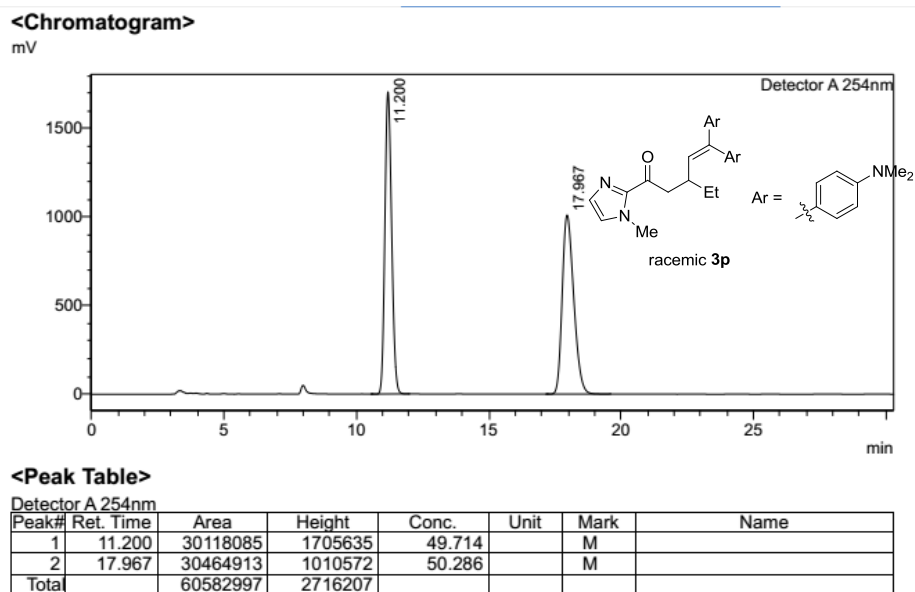

## Chiral **3p**:

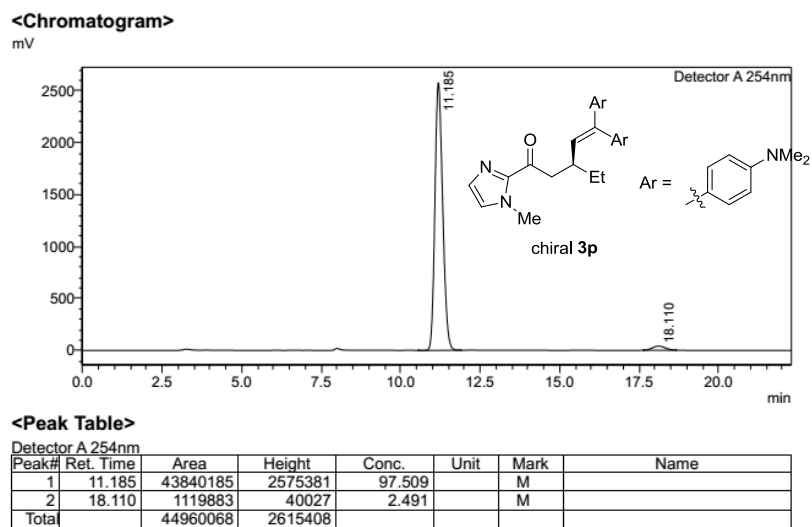

**Figure S18.** HPLC traces of racemic **3p** (reference) and chiral **3p**. Area integration = 97.5:2.5 (95% ee)

## Racemic **3q**

### <Chromatogram>

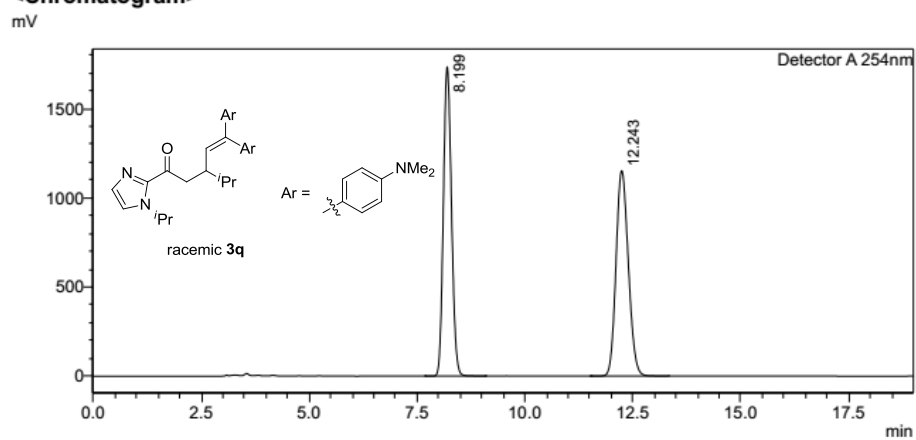

### <Peak Table>

Detector A 254nm

| Peak# | Ret. Time | Area     | Height  | Conc.  | Unit | Mark | Name |
|-------|-----------|----------|---------|--------|------|------|------|
| 1     | 8.199     | 22636451 | 1733187 | 49.821 |      | M    |      |
| 2     | 12.243    | 22799079 | 1151657 | 50.179 |      | M    |      |
| Total |           | 45435529 | 2884844 |        |      |      |      |

## Chiral **3q**:

### <Chromatogram>

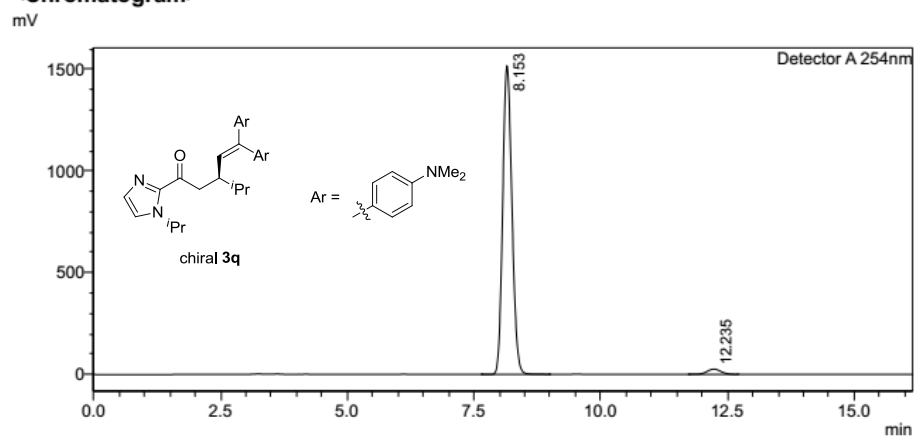

### <Peak Table>

Detector A 254nm

| Peak# | Ret. Time | Area     | Height  | Conc.  | Unit | Mark | Name |
|-------|-----------|----------|---------|--------|------|------|------|
| 1     | 8.153     | 19246721 | 1517773 | 97.525 |      | M    |      |
| 2     | 12.235    | 488460   | 25737   | 2.475  |      | M    |      |
| Total |           | 19735180 | 1543510 |        |      |      |      |

**Figure S16.** HPLC traces of racemic **3q** (reference) and chiral **3q**. Area integration = 97.5:2.5 (95% ee)

## Racemic **3r**

### <Chromatogram>

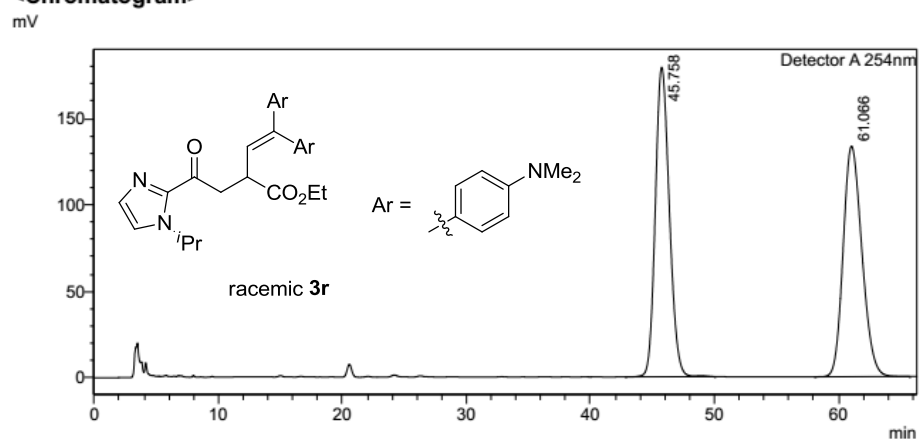

### <Peak Table>

| Detector A 254nm |           |          |        |        |      |      |      |
|------------------|-----------|----------|--------|--------|------|------|------|
| Peak#            | Ret. Time | Area     | Height | Conc.  | Unit | Mark | Name |
| 1                | 45.758    | 14097815 | 179211 | 50.102 |      | M    |      |
| 2                | 61.066    | 14040337 | 133392 | 49.898 |      | M    |      |
| Total            |           | 28138152 | 312603 |        |      |      |      |

## Chiral **3r**:

### <Chromatogram>

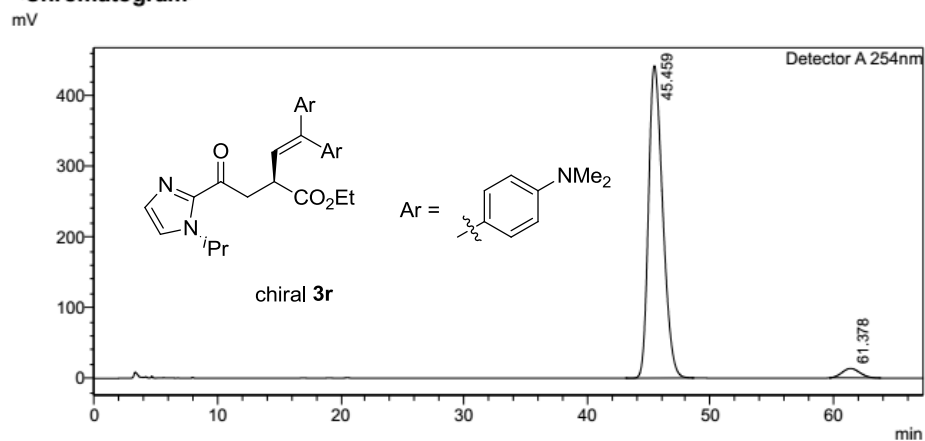

### <Peak Table>

| Detector A 254nm |           |          |        |        |      |      |      |
|------------------|-----------|----------|--------|--------|------|------|------|
| Peak#            | Ret. Time | Area     | Height | Conc.  | Unit | Mark | Name |
| 1                | 45.459    | 35350204 | 441447 | 96.344 |      | M    |      |
| 2                | 61.378    | 1341354  | 13314  | 3.656  |      | M    |      |
| Total            |           | 36691558 | 454761 |        |      |      |      |

**Figure S15.** HPLC traces of racemic **3r** (reference) and chiral **3r**. Area integration = 96.3:3.7

(93% ee)

## Racemic **3s**

### <Chromatogram>

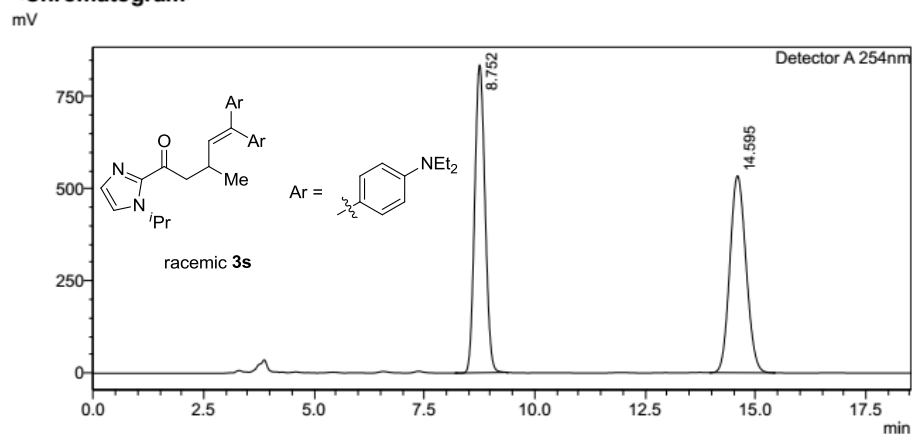

### <Peak Table>

Detector A 254nm

| Peak# | Ret. Time | Area     | Height  | Conc.  | Unit | Mark | Name |
|-------|-----------|----------|---------|--------|------|------|------|
| 1     | 8.752     | 13594395 | 835070  | 49.929 |      | M    |      |
| 2     | 14.595    | 13632973 | 534271  | 50.071 |      | M    |      |
| Total |           | 27227369 | 1369342 |        |      |      |      |

## Chiral **3s**:

### <Chromatogram>

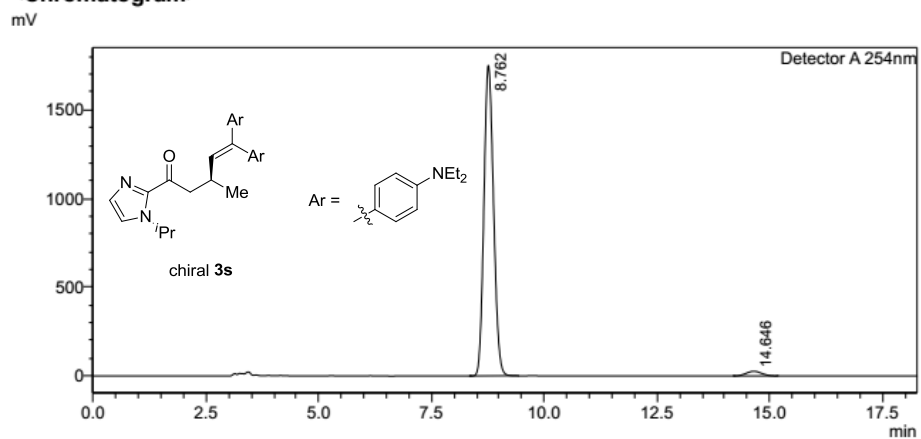

### <Peak Table>

Detector A 254nm

| Peak# | Ret. Time | Area     | Height  | Conc.  | Unit | Mark | Name |
|-------|-----------|----------|---------|--------|------|------|------|
| 1     | 8.762     | 26022481 | 1749213 | 97.673 |      | M    |      |
| 2     | 14.646    | 620075   | 26204   | 2.327  |      | M    |      |
| Total |           | 26642556 | 1775417 |        |      |      |      |

**Figure S19.** HPLC traces of racemic **3s** (reference) and chiral **3s**. Area integration = 97.7:2.3 (95% ee)

## Racemic **3t**

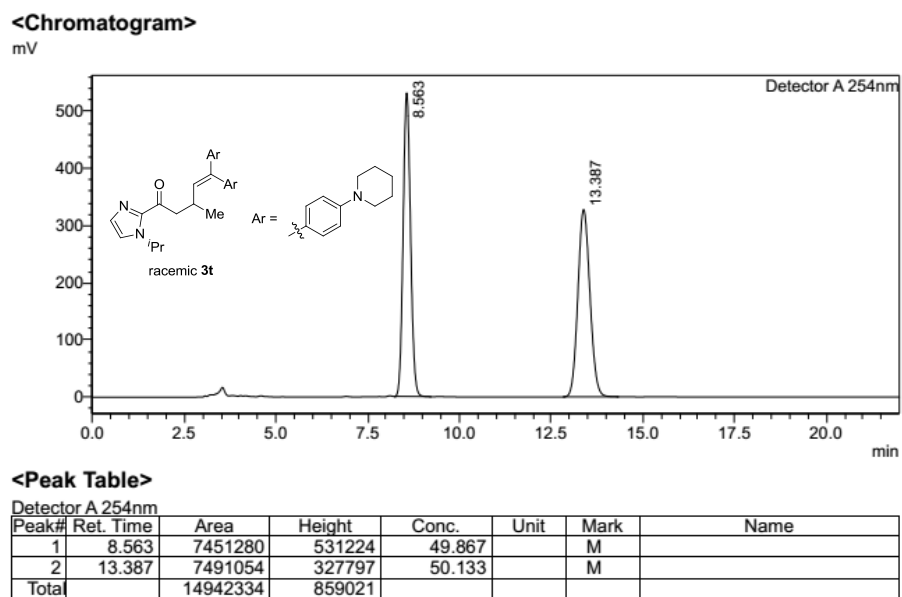

## Chiral **3t**:

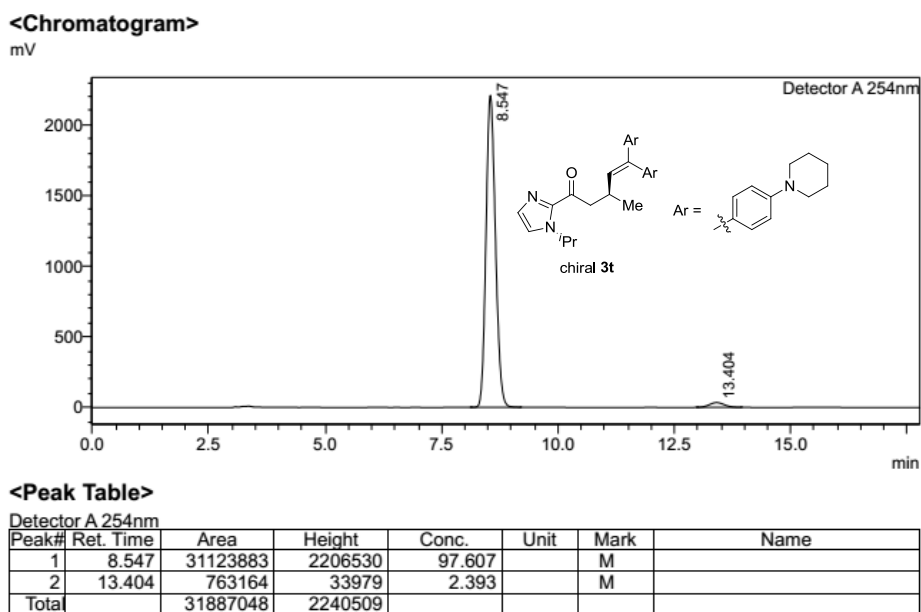

**Figure S20.** HPLC traces of racemic **3t** (reference) and chiral **3t**. Area integration = 97.6:2.4 (95% ee)



## Racemic **4**

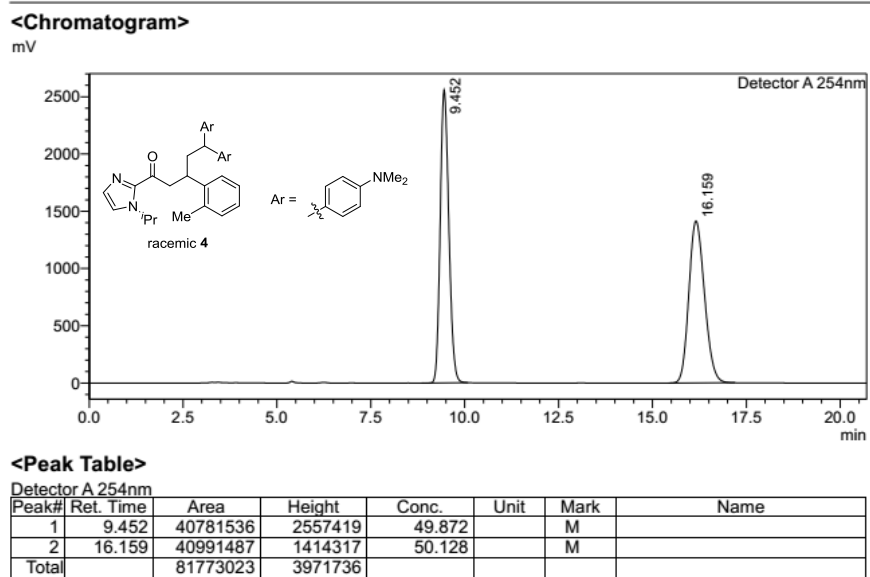

## Chiral **4**

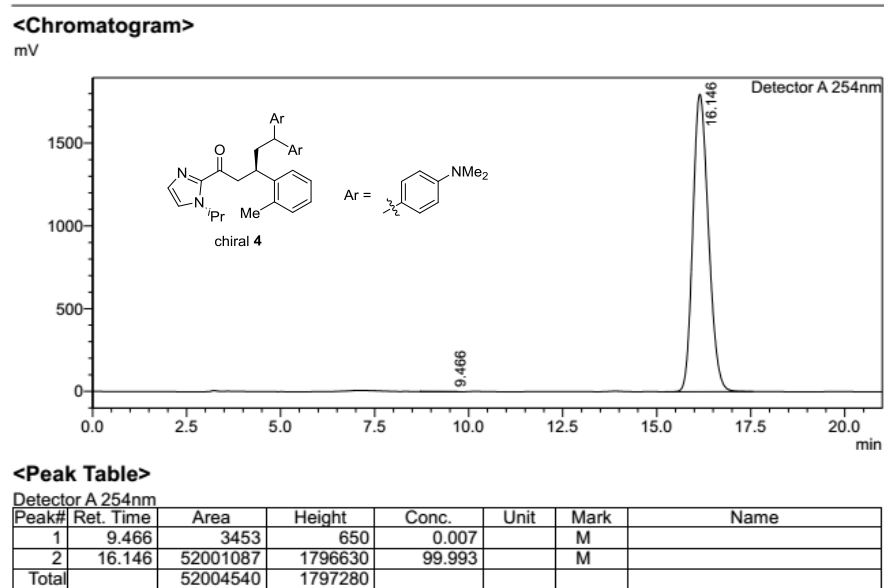

HPLC traces of racemic **4** (reference) and chiral **4**. Area integration = 0.01:99.99 (> 99% ee)

## V NMR Spectra of Products

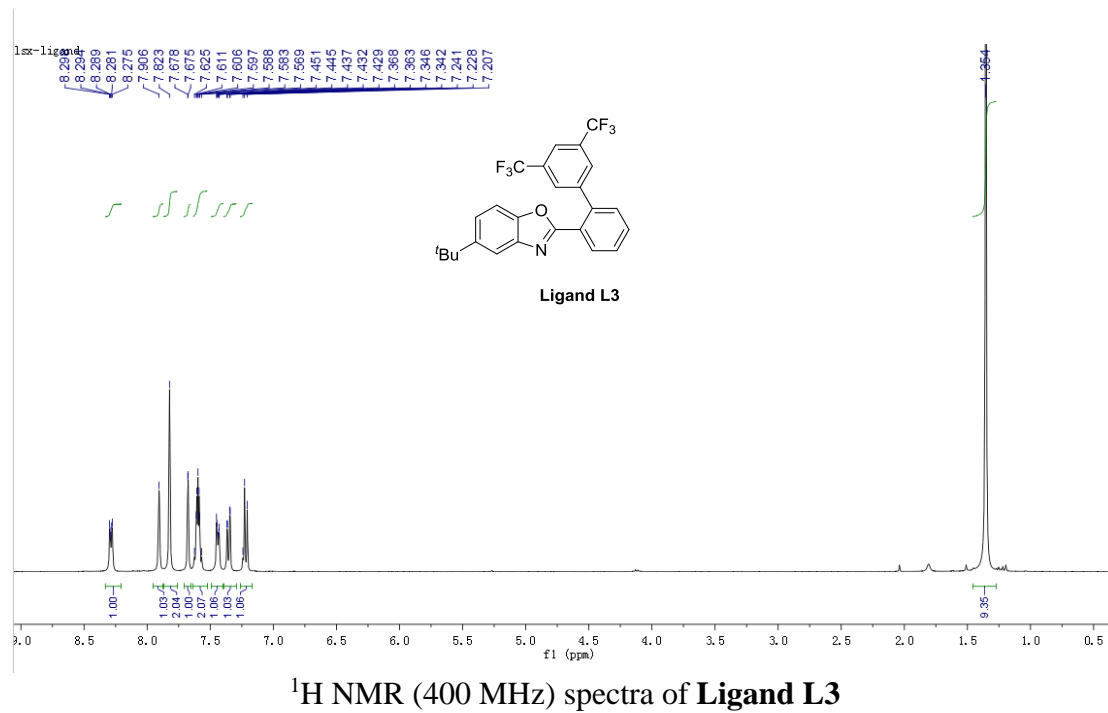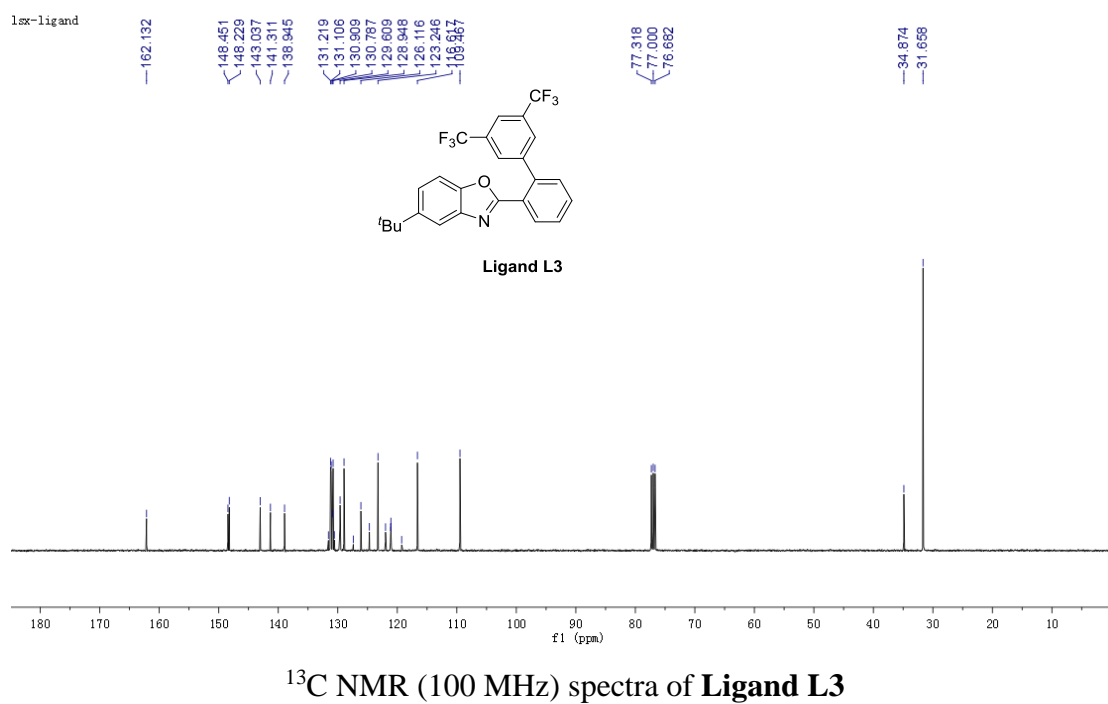

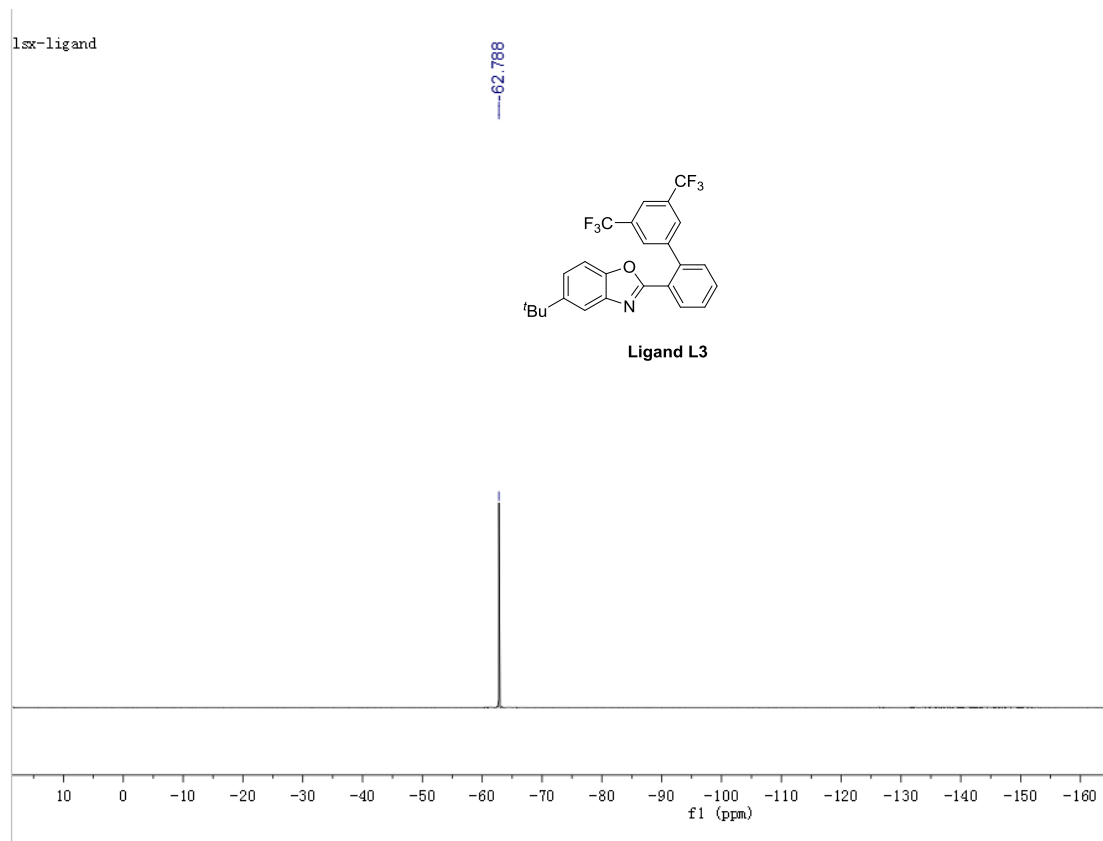

$^{19}\text{F}$  NMR (376.4 MHz) spectra of **Ligand L3**

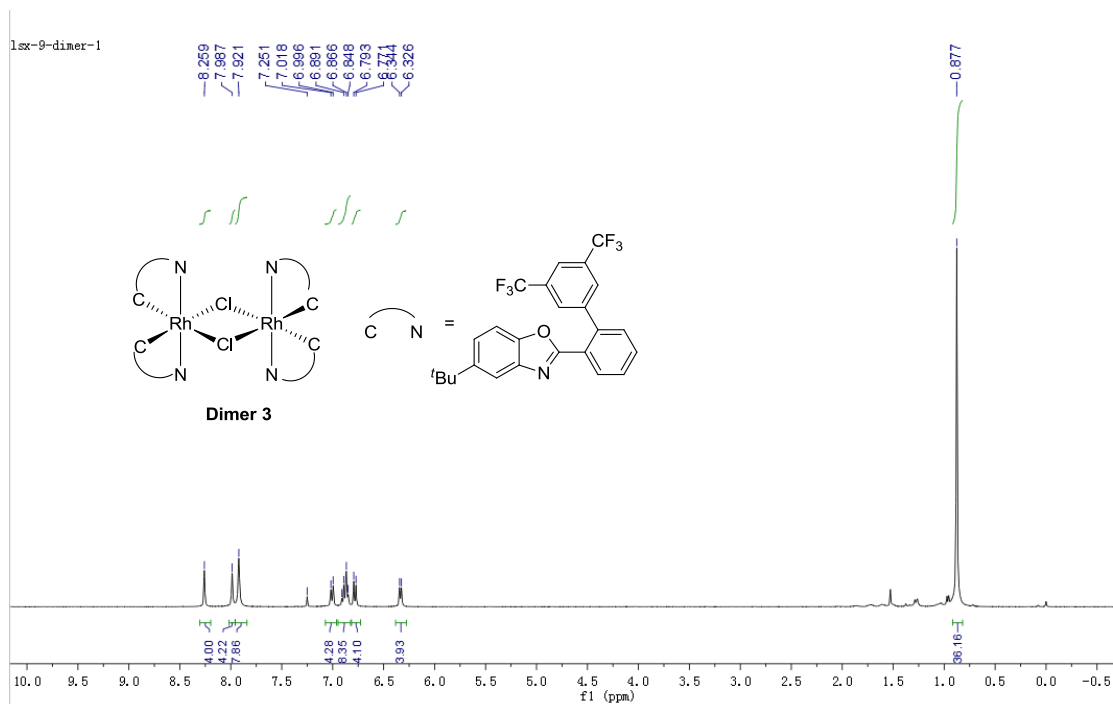

$^1\text{H}$  NMR (400 MHz) spectra of **Dimer 3**

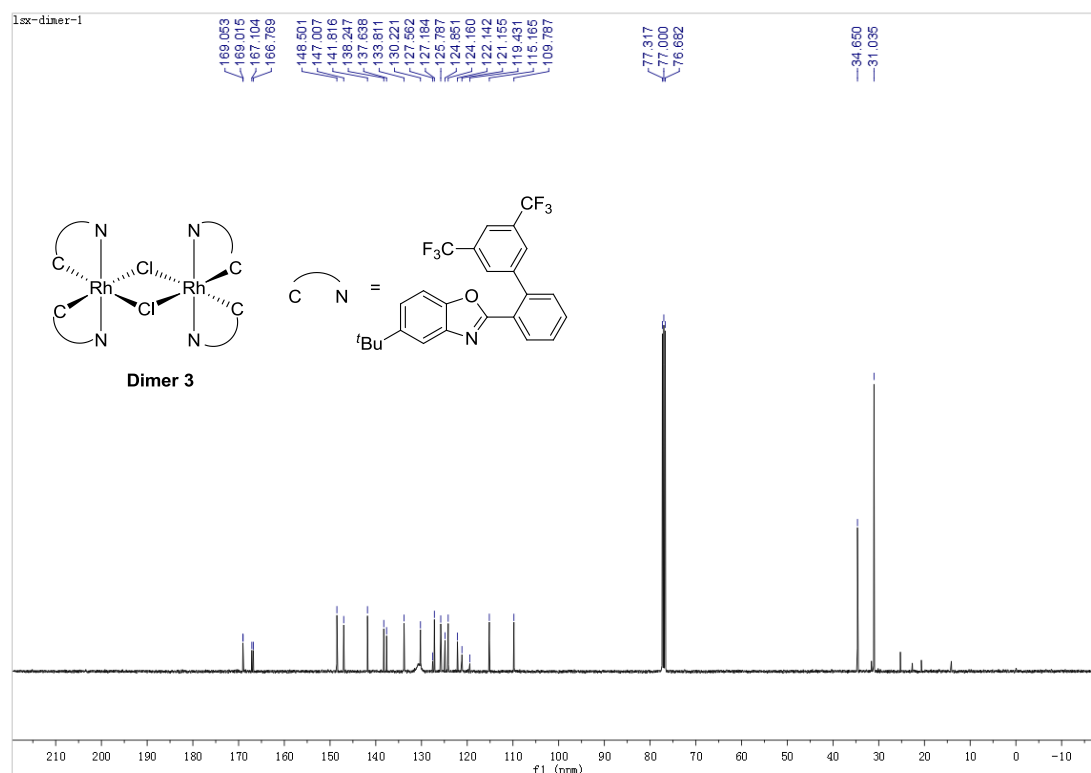

<sup>13</sup>C NMR (100 MHz) spectra of **Dimer 3**

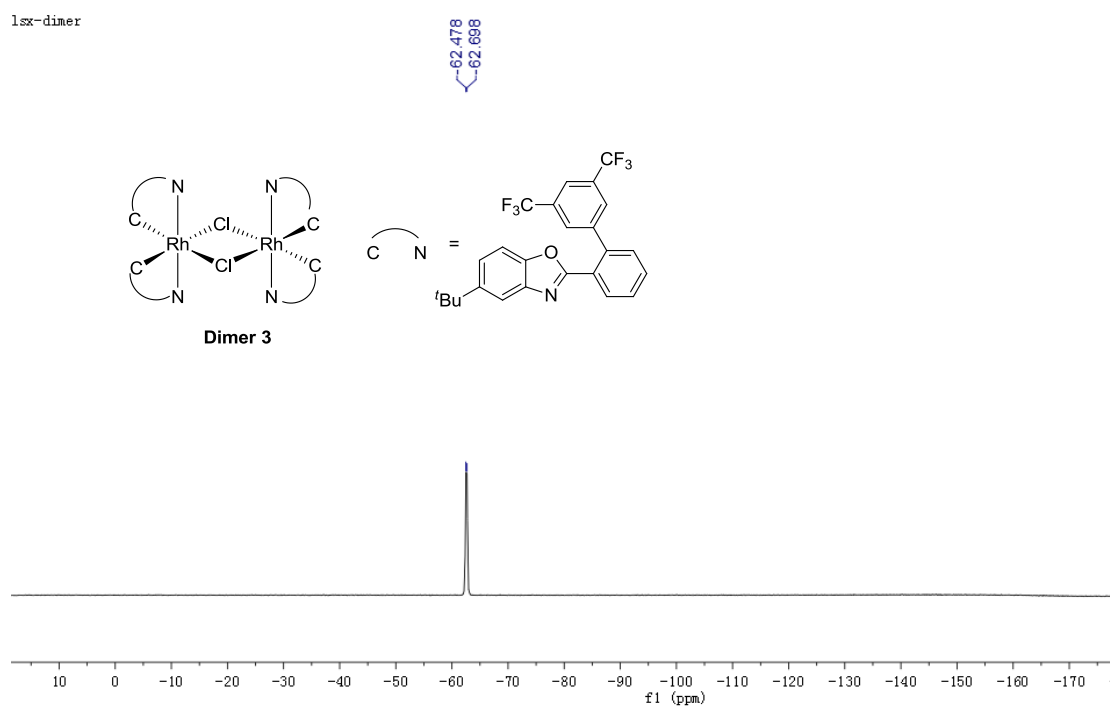

<sup>19</sup>F NMR (376.4 MHz) spectra of **Dimer 3**

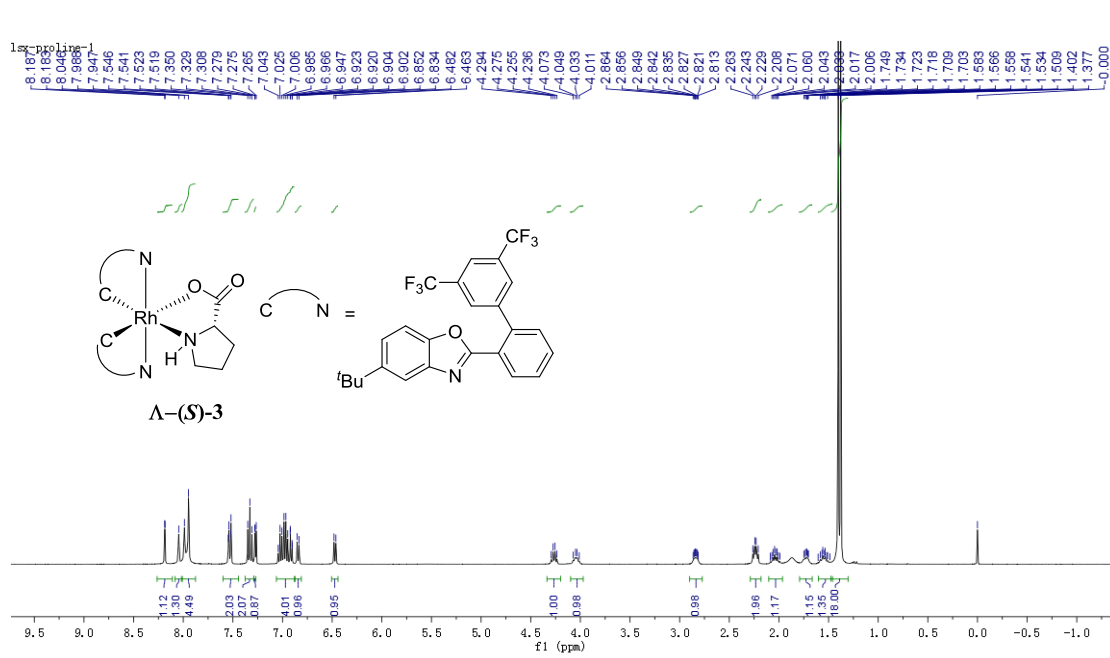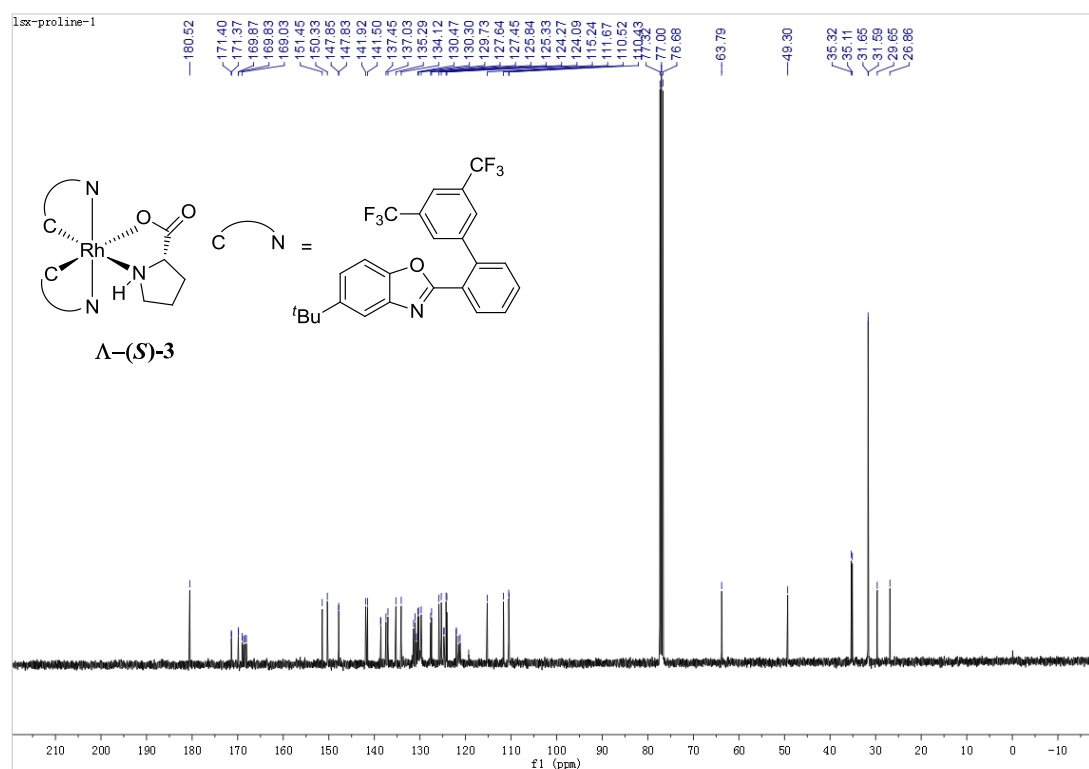

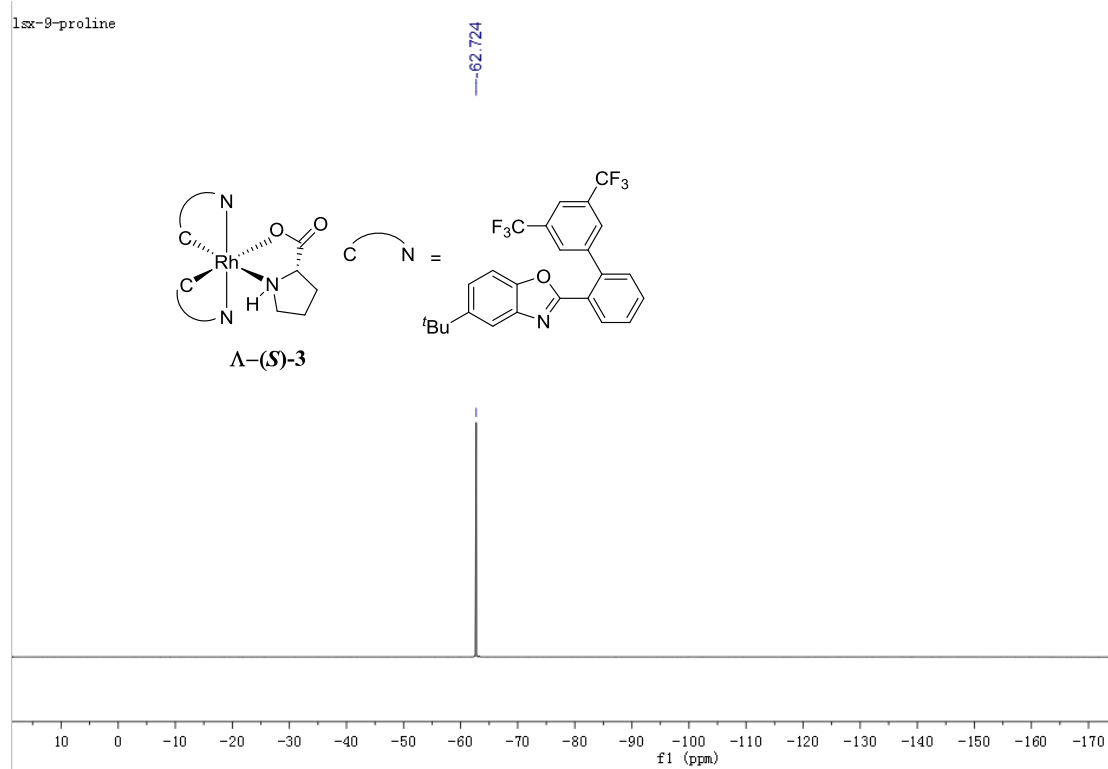

$^{19}\text{F}$  NMR (376.4 MHz) spectra of  $\Lambda$ -(S)-3

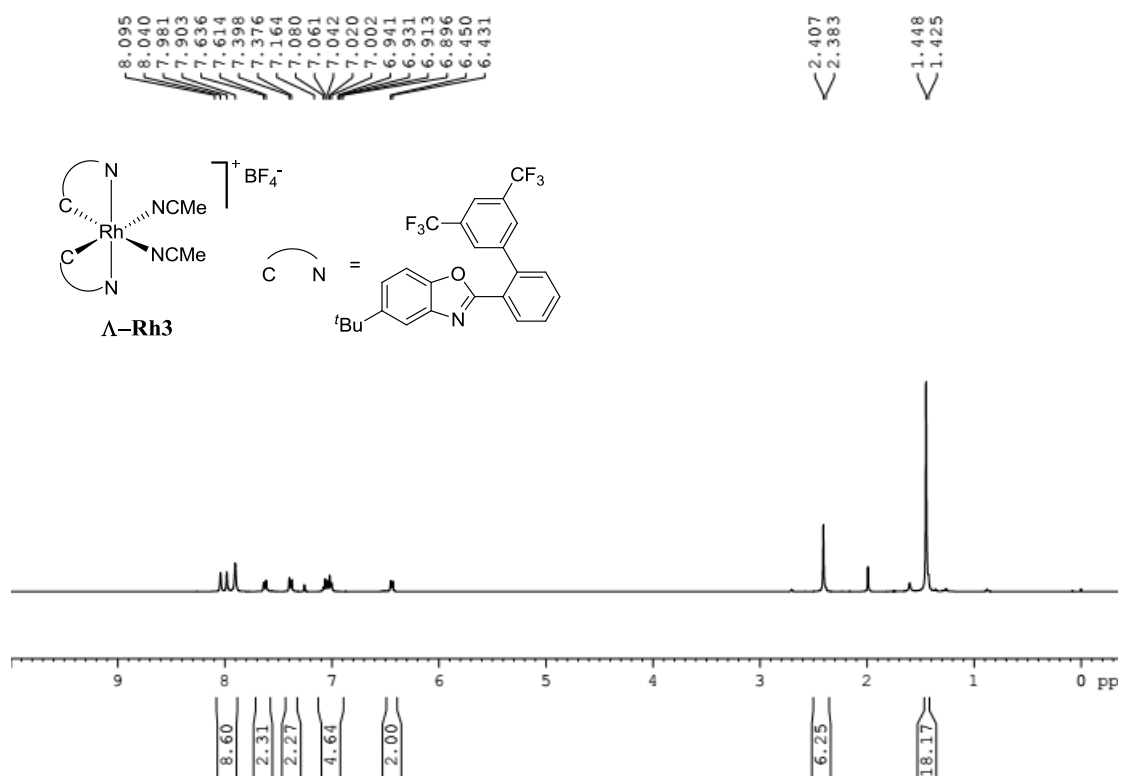

$^1\text{H}$  NMR (400 MHz) spectra of catalyst  $\Lambda$ -Rh3

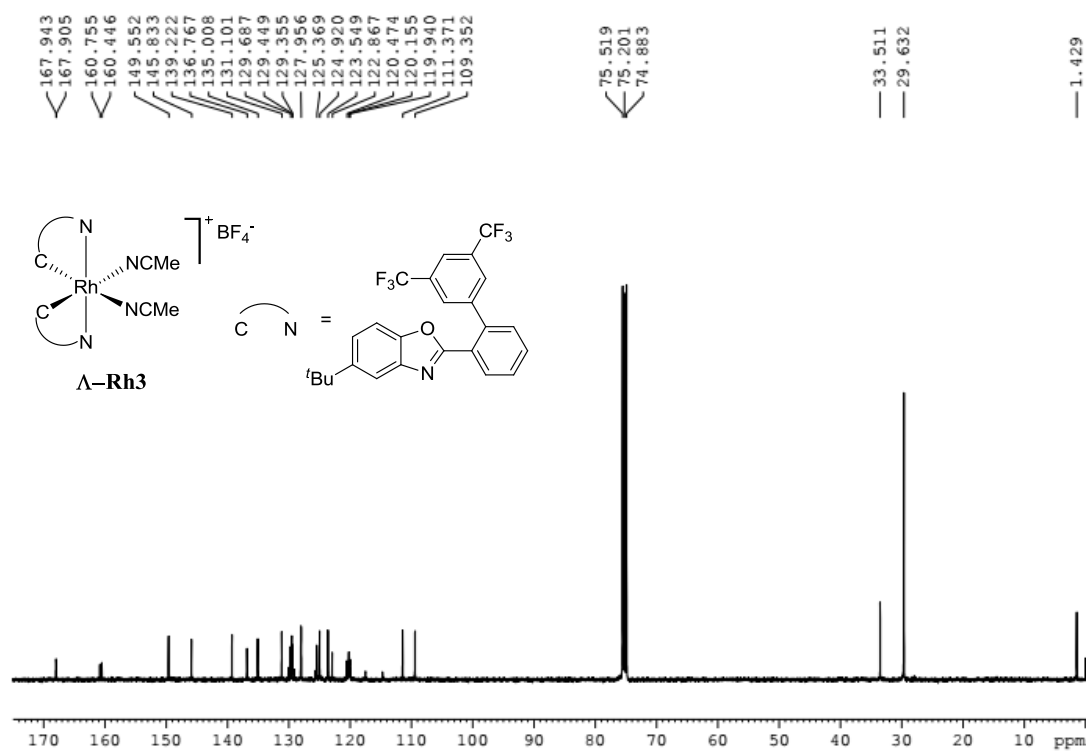

$^{13}\text{C}$  NMR (100 MHz) spectra of catalyst  $\Lambda$ -Rh3

## VI NMR Spectra of Substrates

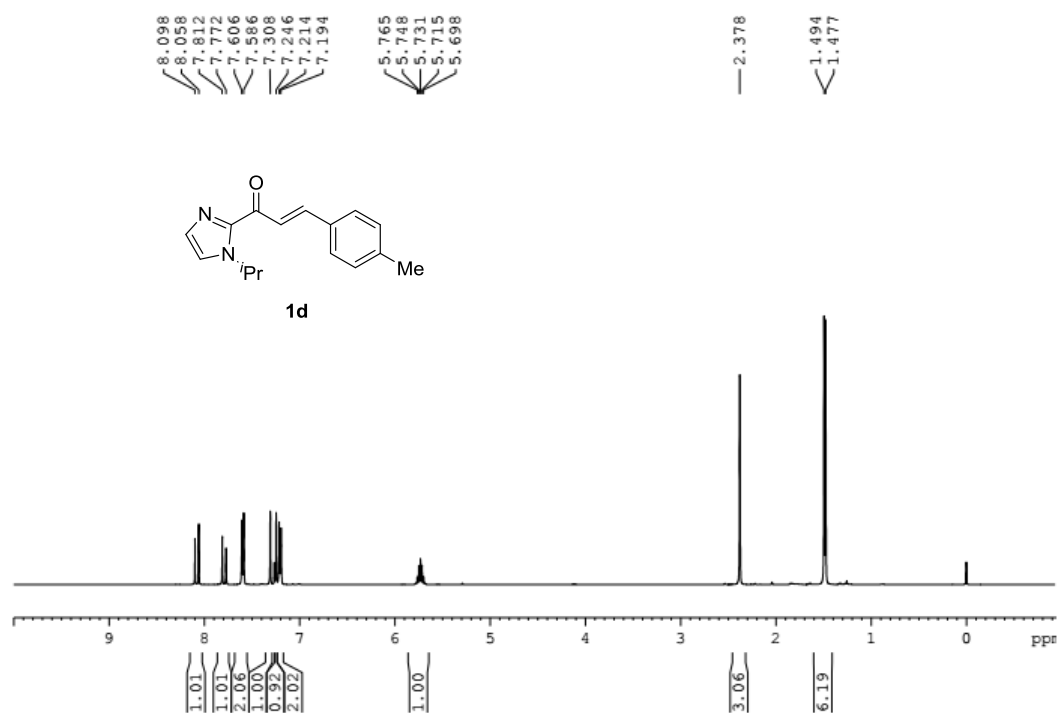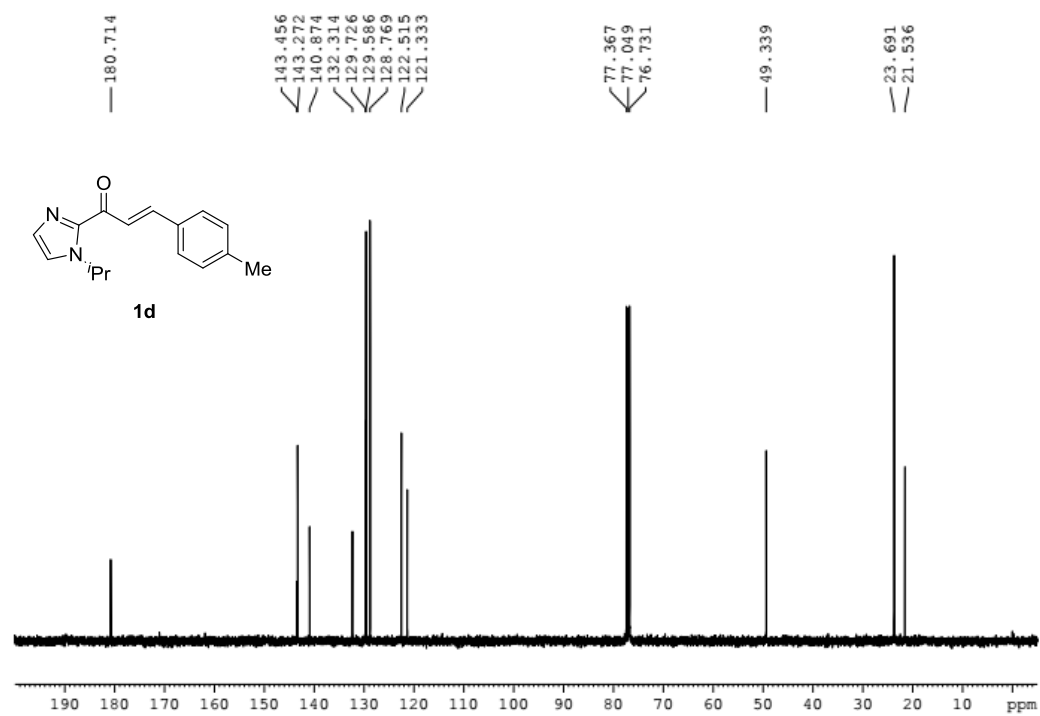

<sup>1</sup>H NMR (400 MHz) and <sup>13</sup>C NMR (100 MHz) spectra of **1d**



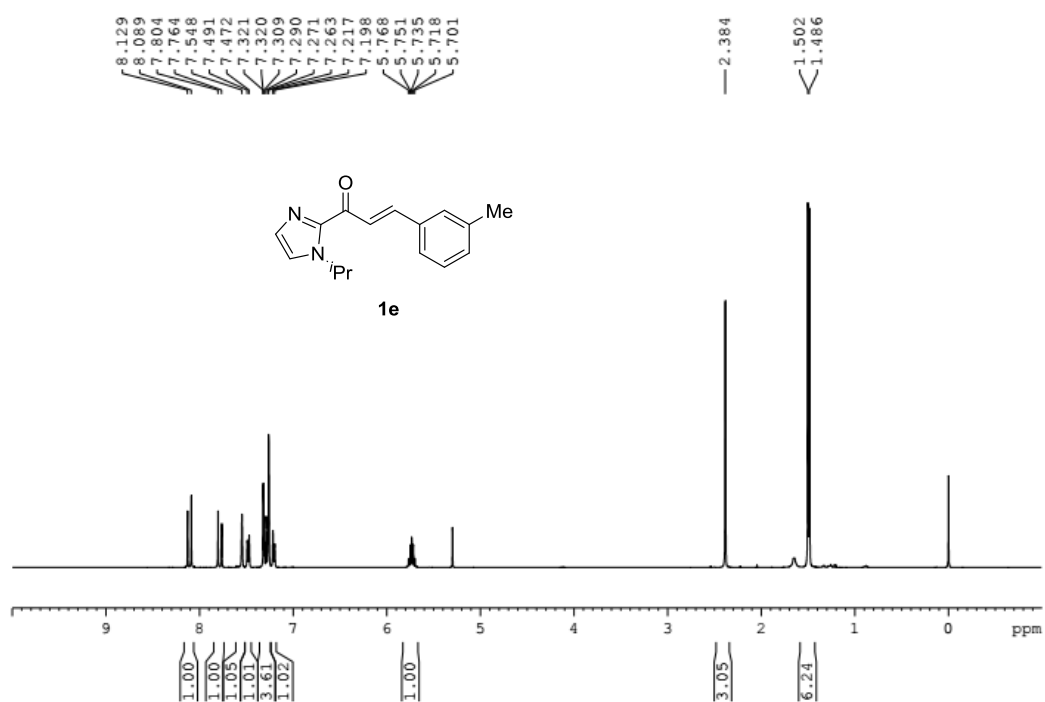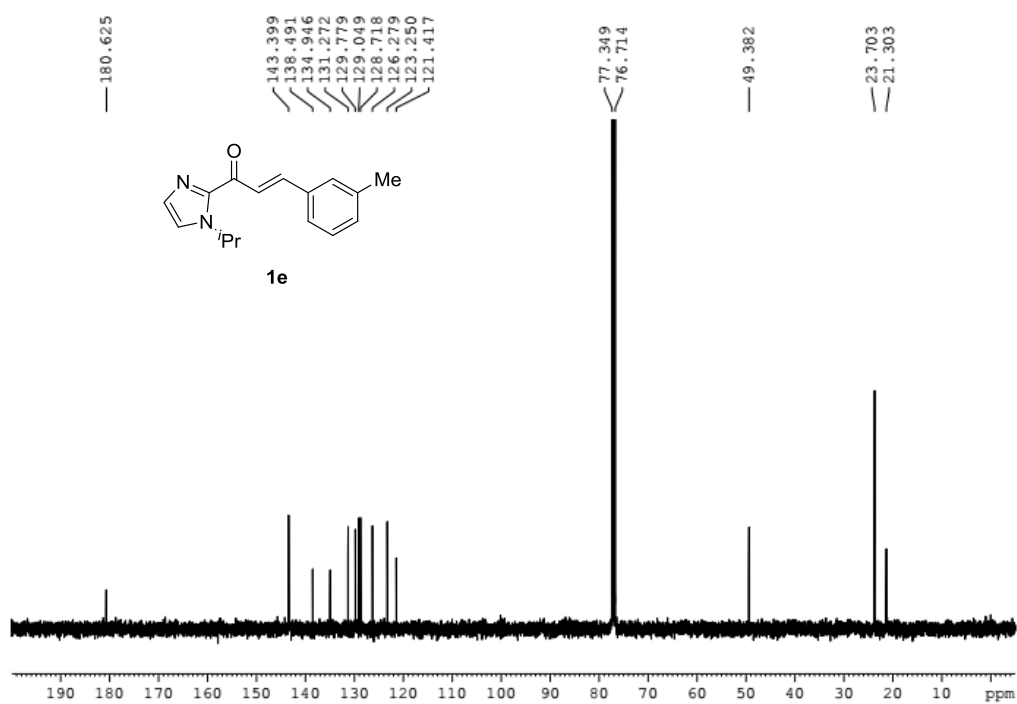

$^1\text{H}$  NMR (400 MHz) and  $^{13}\text{C}$  NMR (100 MHz) spectra of **1e**

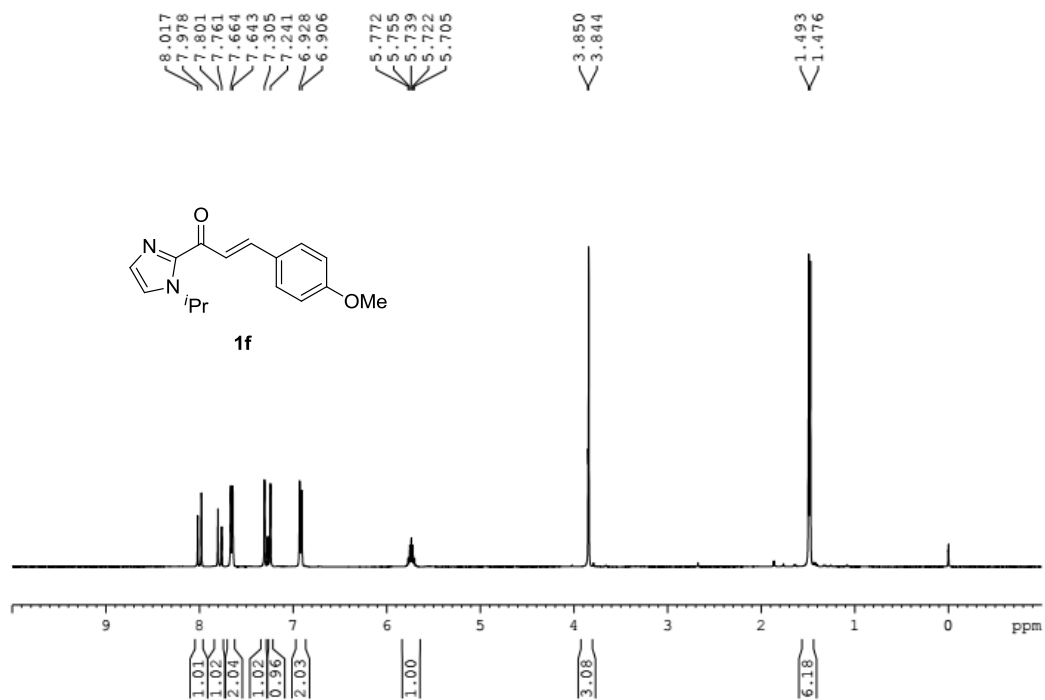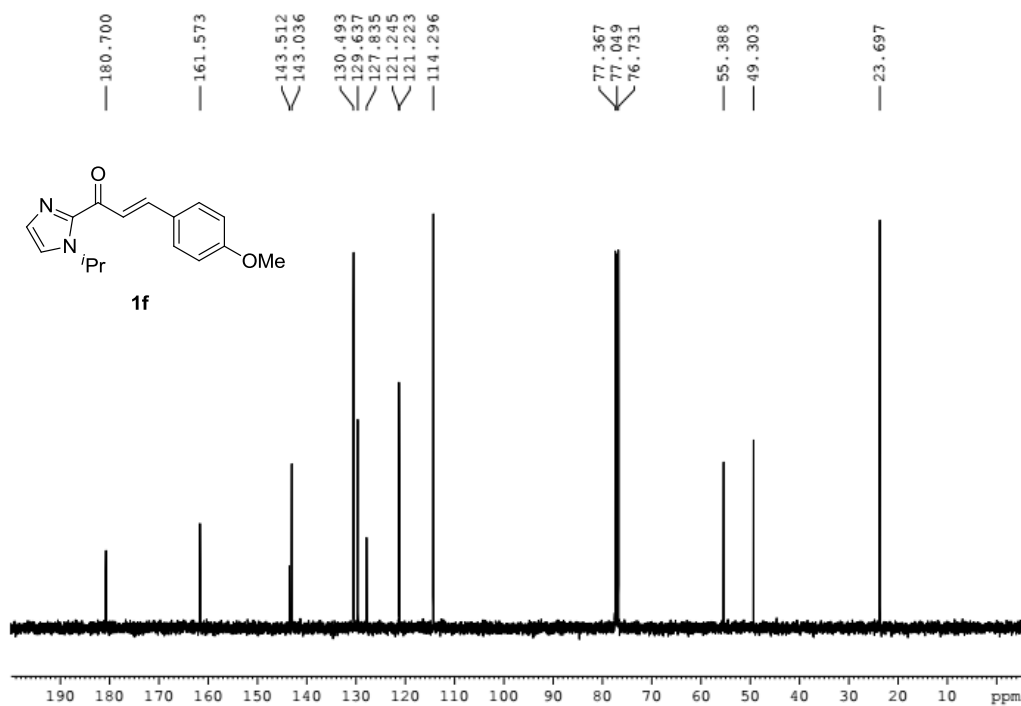

$^1\text{H}$  NMR (400 MHz) and  $^{13}\text{C}$  NMR (100 MHz) spectra of **1f**

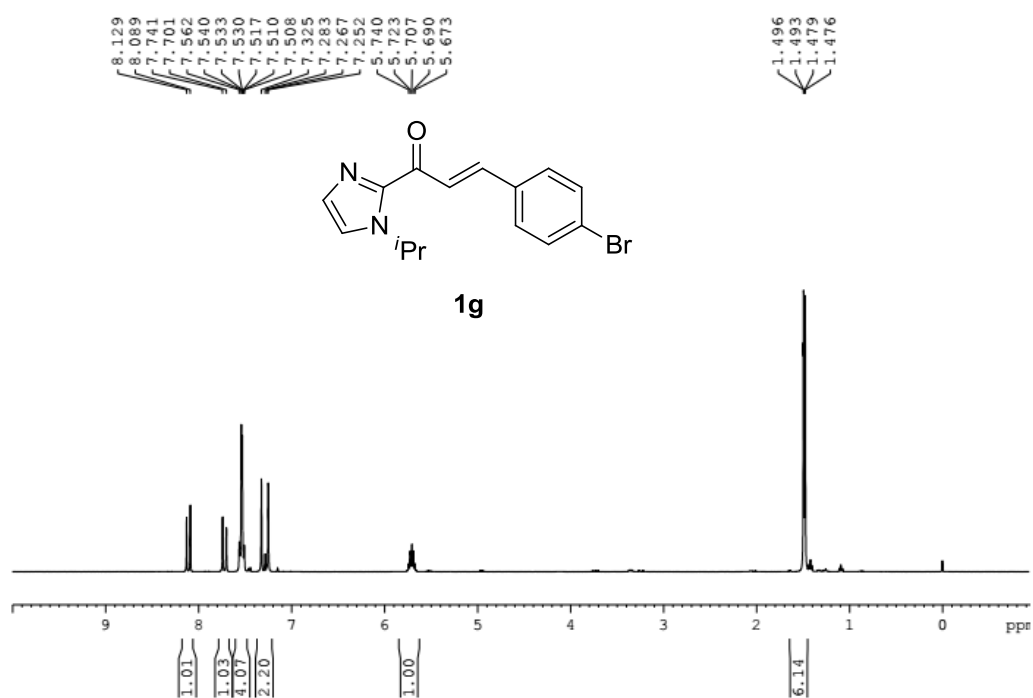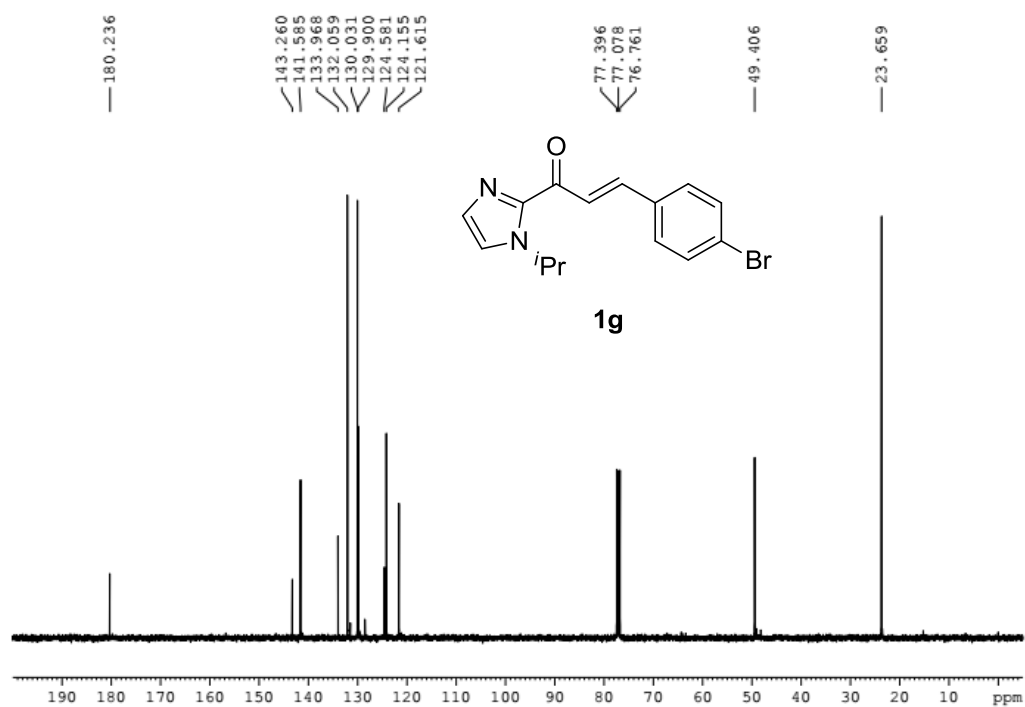

<sup>1</sup>H NMR (400 MHz) and <sup>13</sup>C NMR (100 MHz) spectra of **1g**

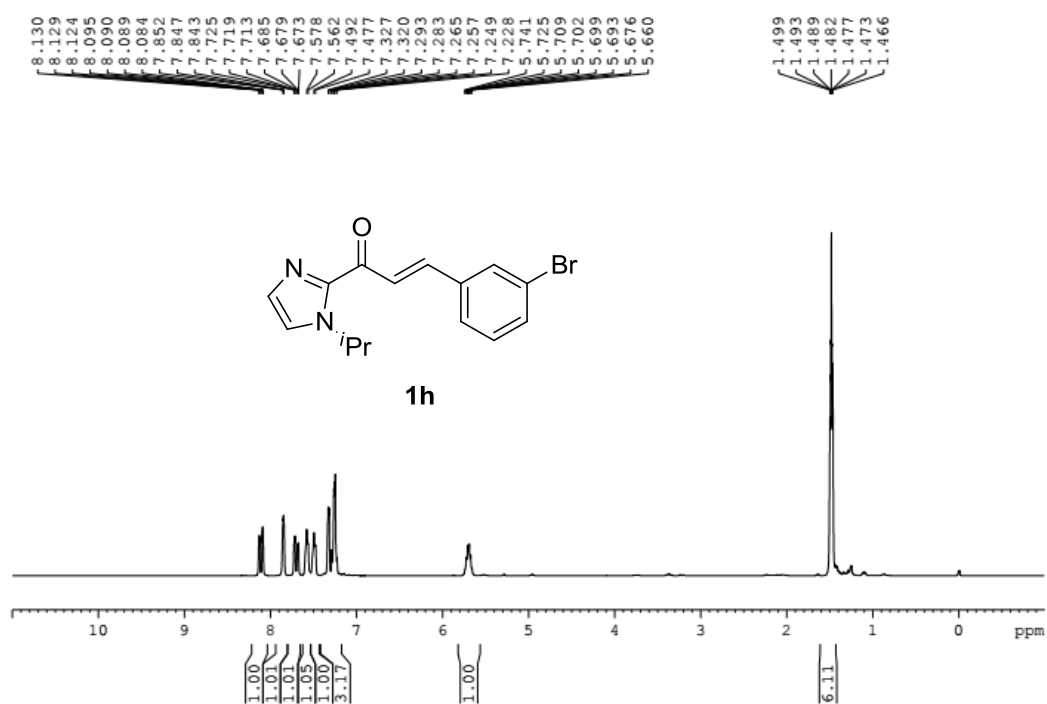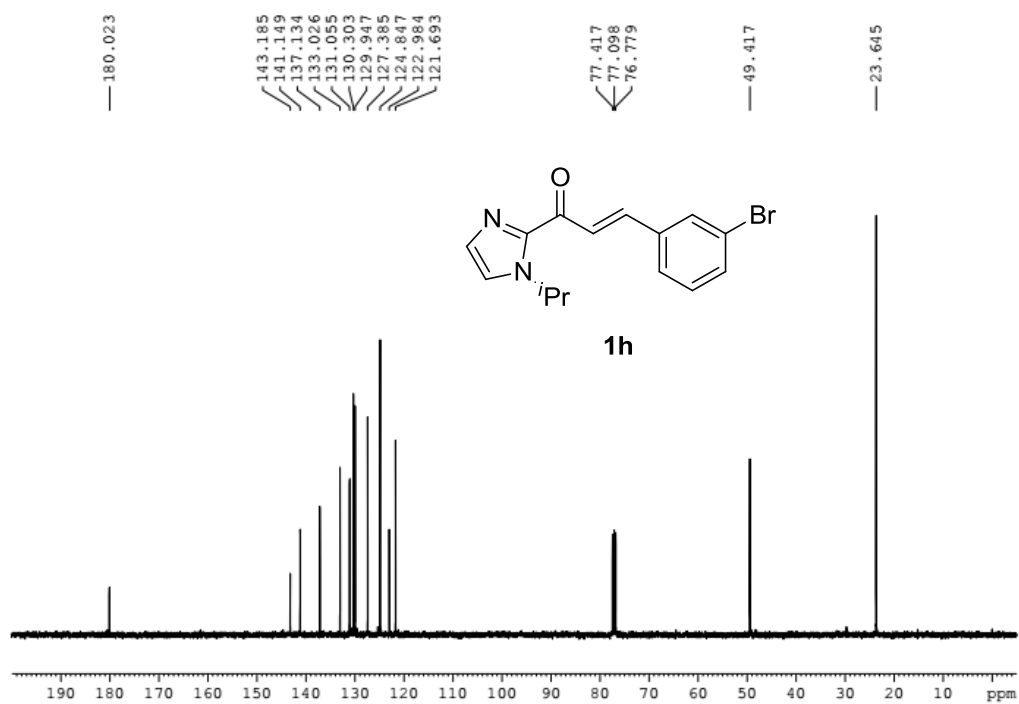

<sup>1</sup>H NMR (400 MHz) and <sup>13</sup>C NMR (100 MHz) spectra of **1h**

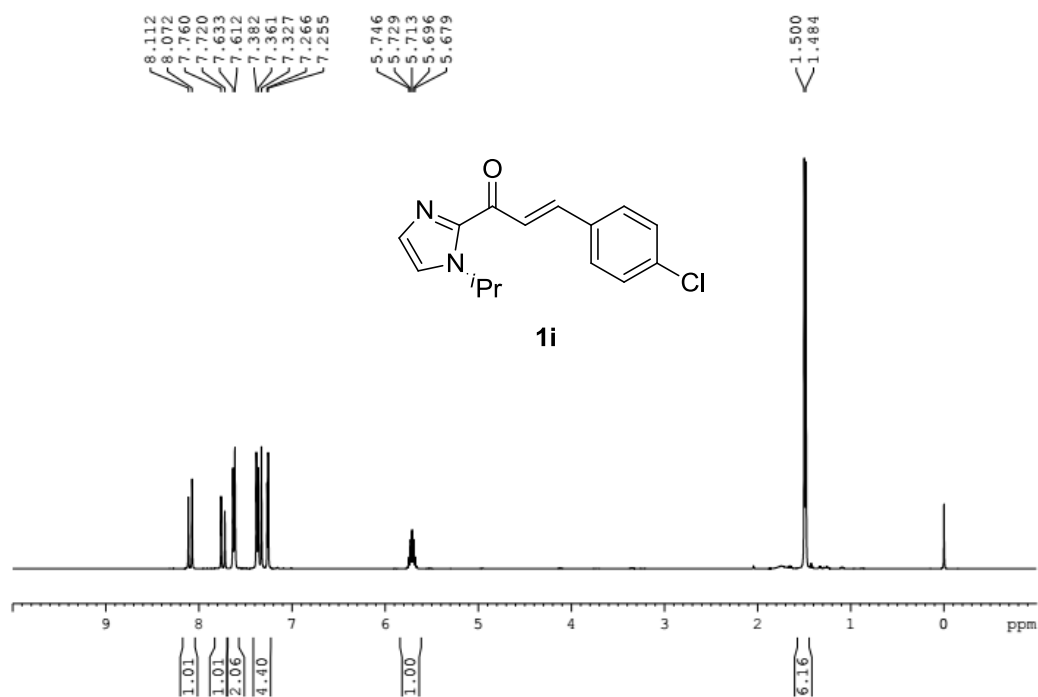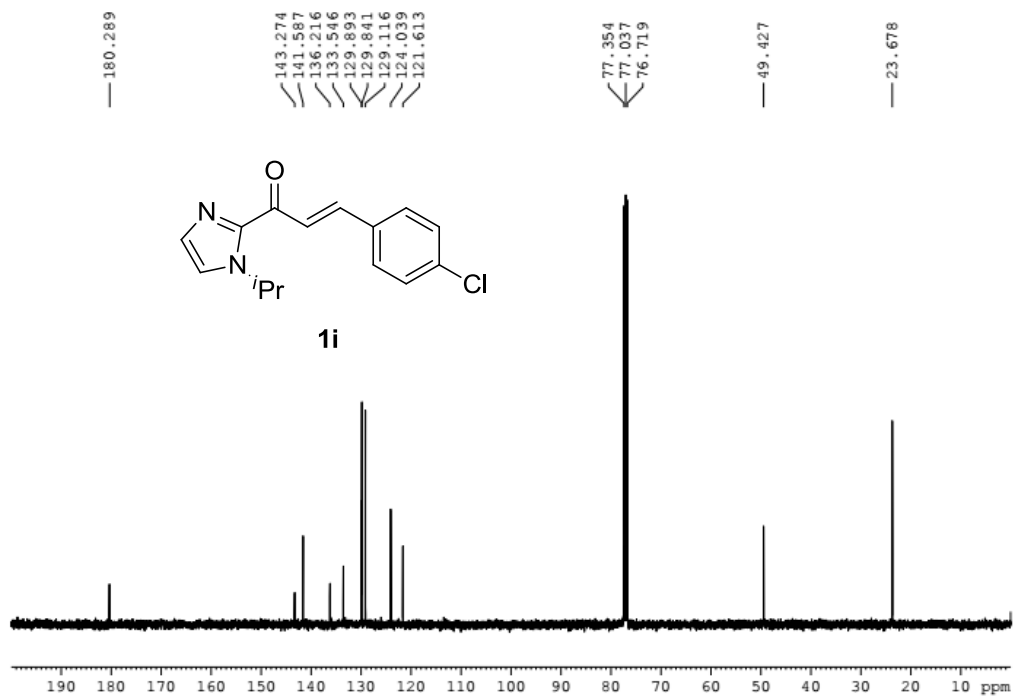

<sup>1</sup>H NMR (400 MHz) and <sup>13</sup>C NMR (100 MHz) spectra of **1i**

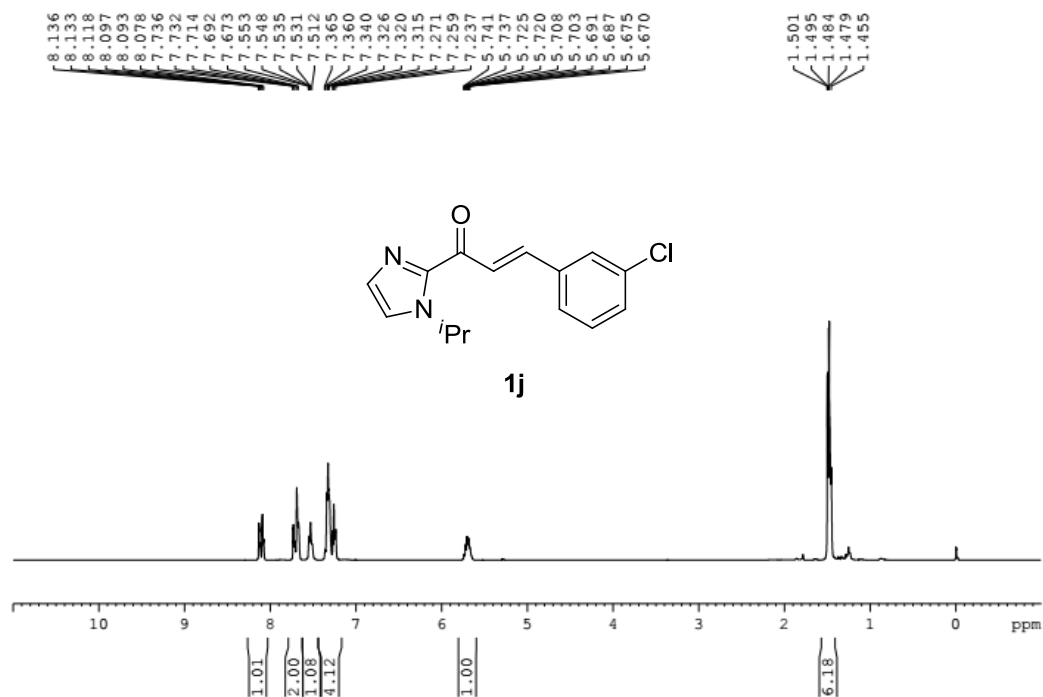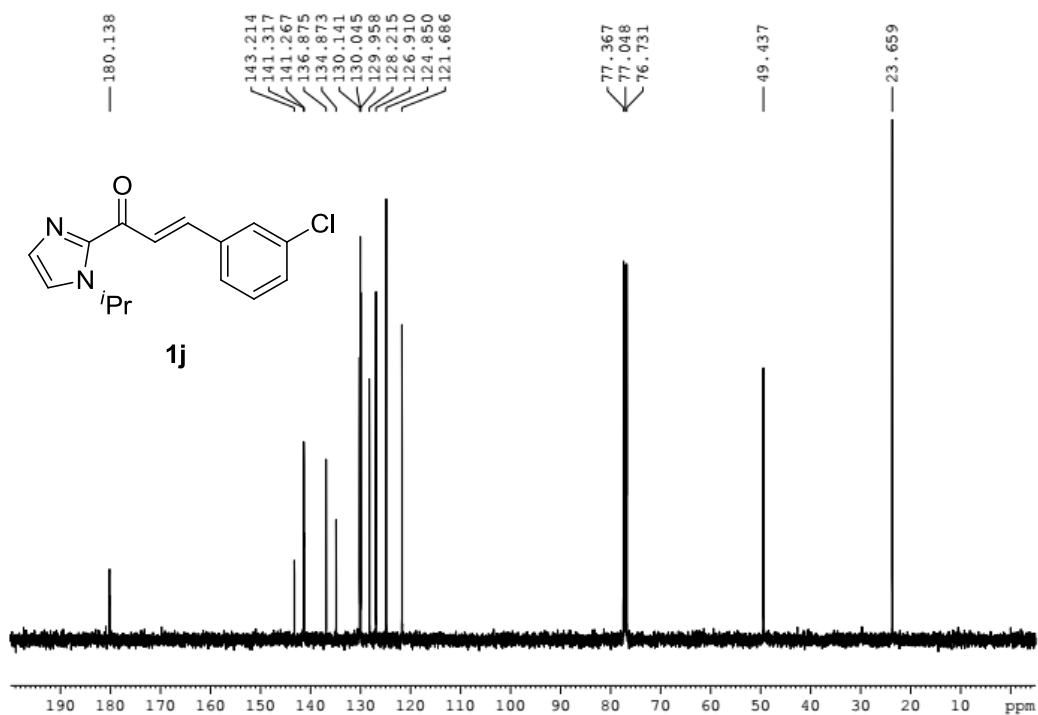

<sup>1</sup>H NMR (400 MHz) and <sup>13</sup>C NMR (100 MHz) spectra of **1j**

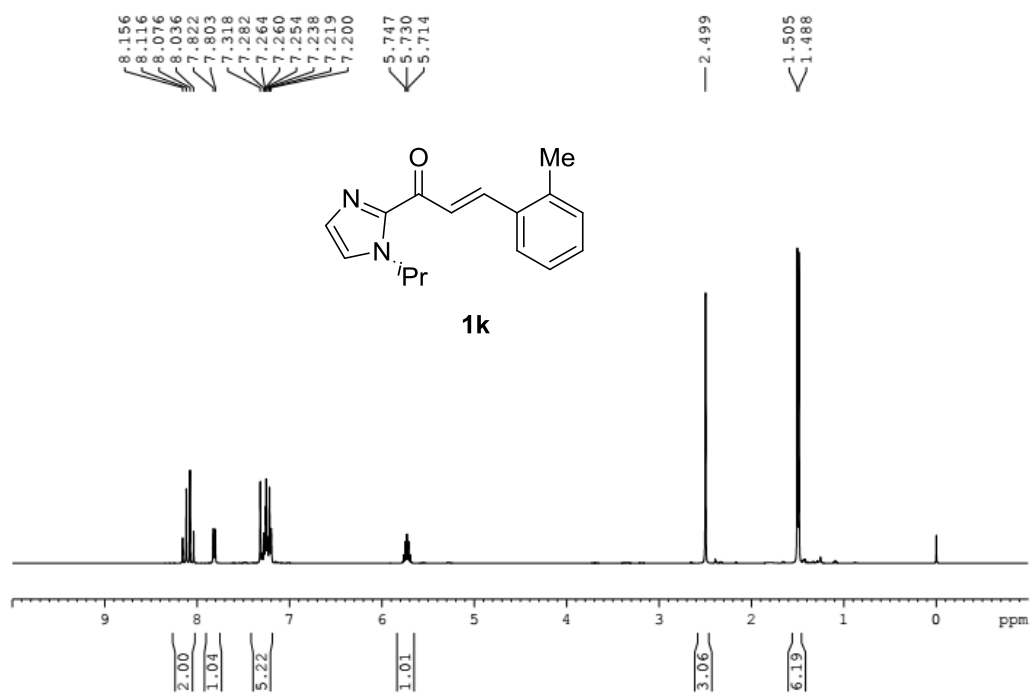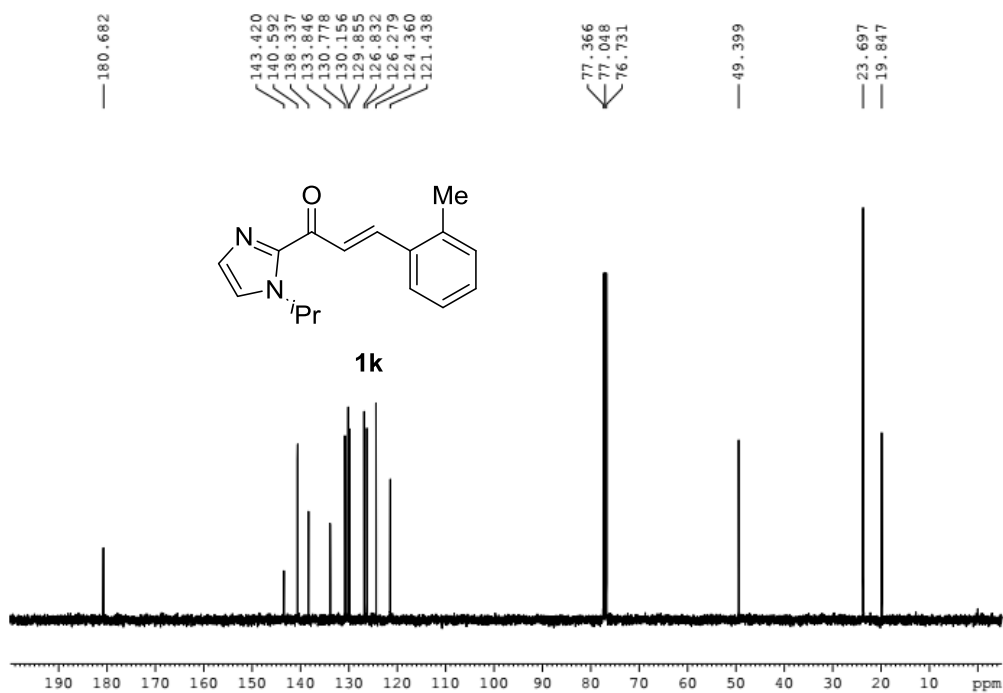

<sup>1</sup>H NMR (400 MHz) and <sup>13</sup>C NMR (100 MHz) spectra of **1k**

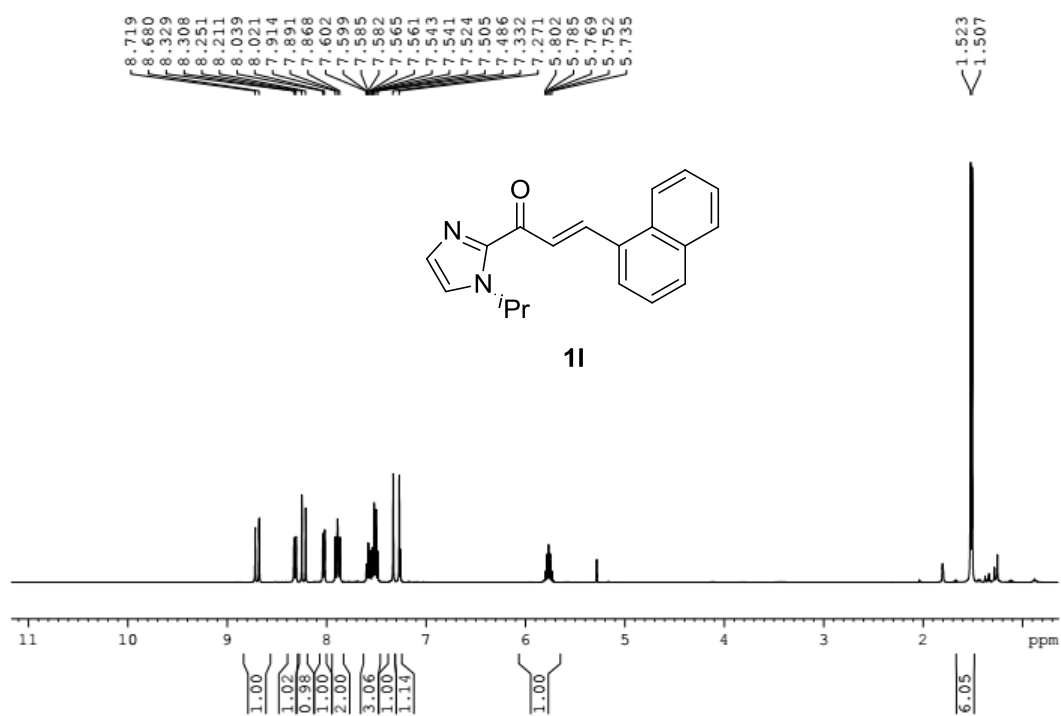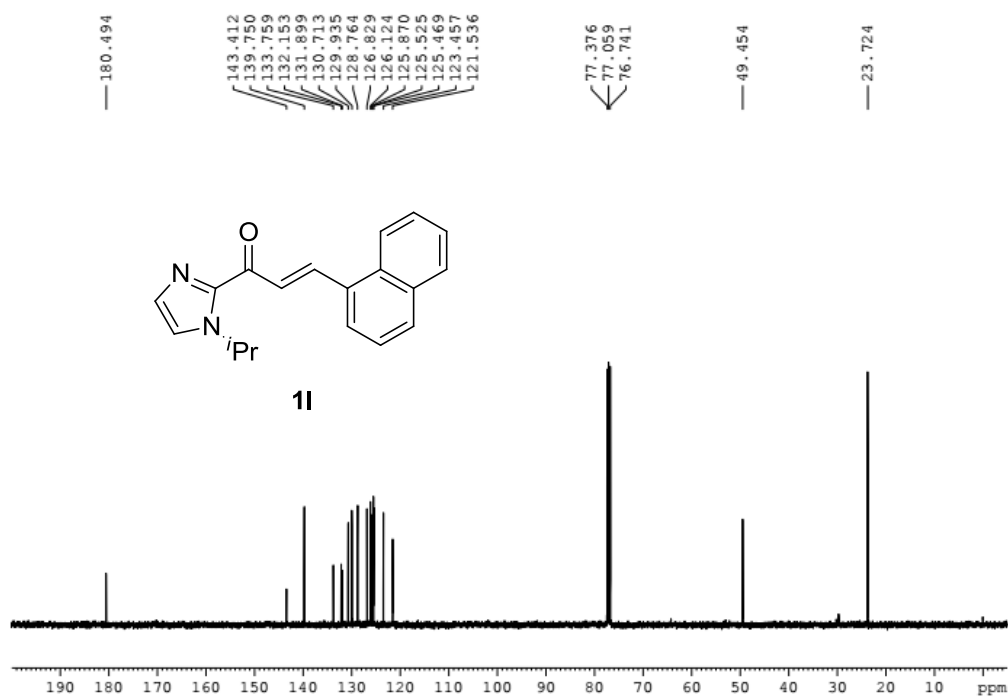

$^1\text{H}$  NMR (400 MHz) and  $^{13}\text{C}$  NMR (100 MHz) spectra of **11**



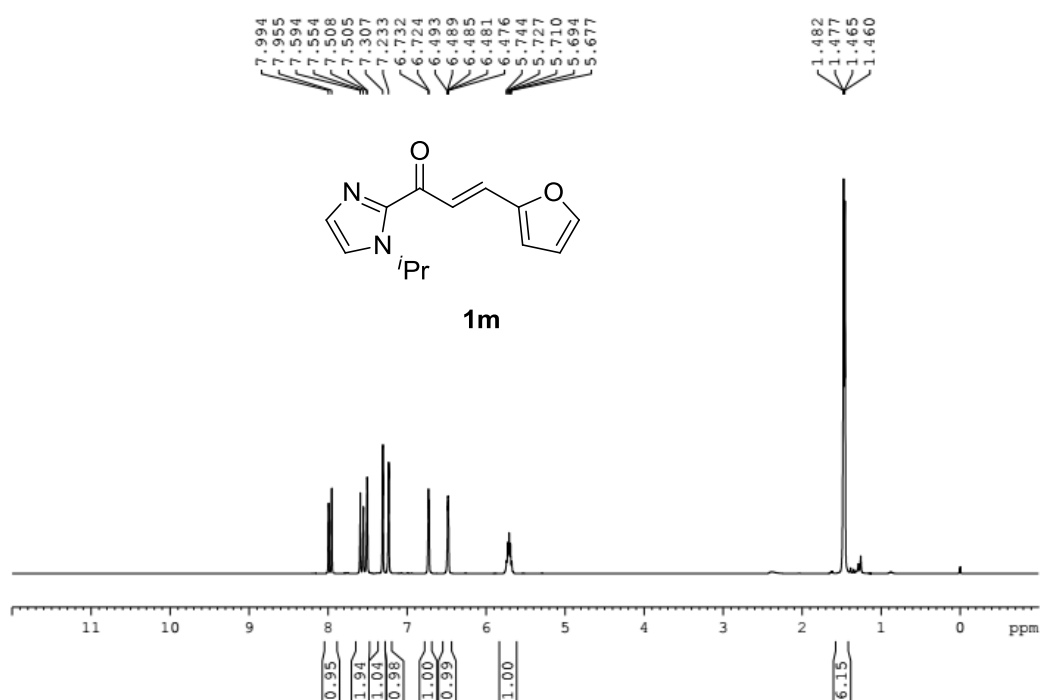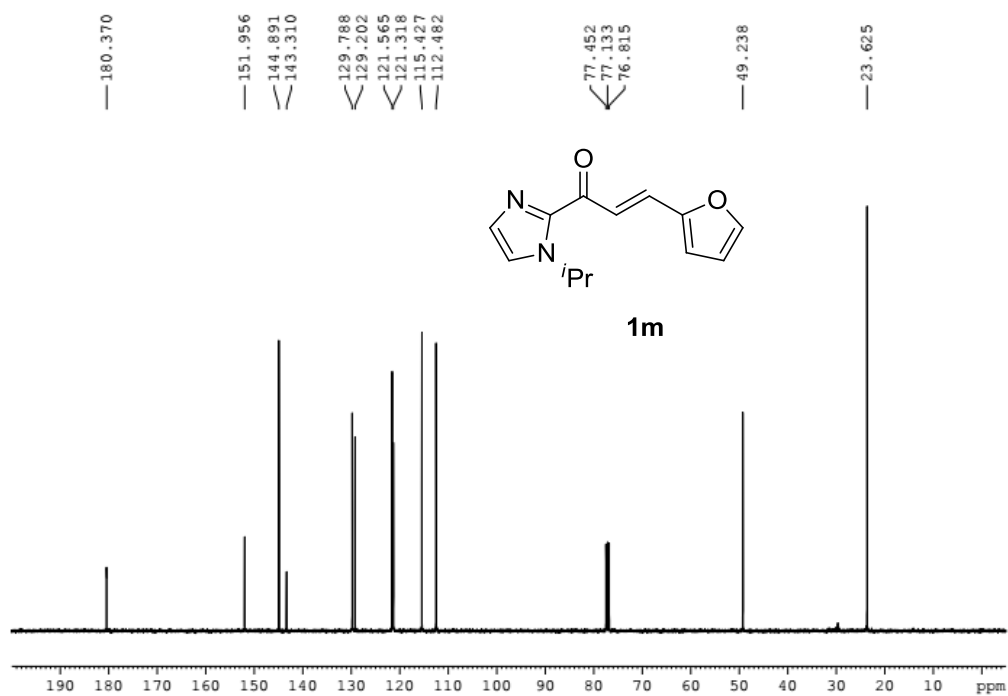

<sup>1</sup>H NMR (400 MHz) and <sup>13</sup>C NMR (100 MHz) spectra of **1m**

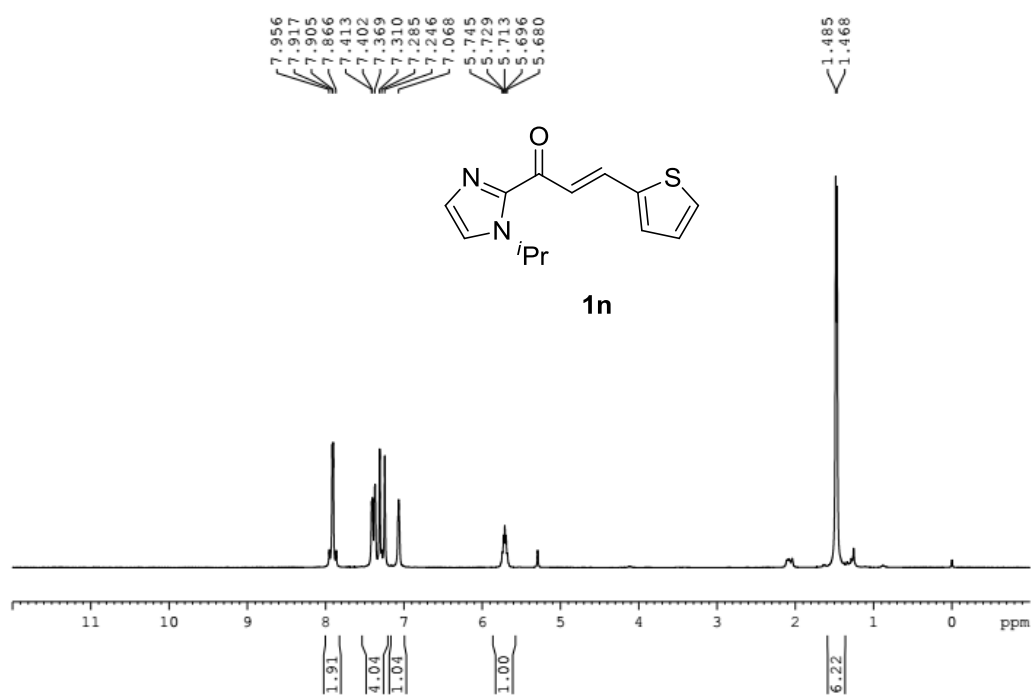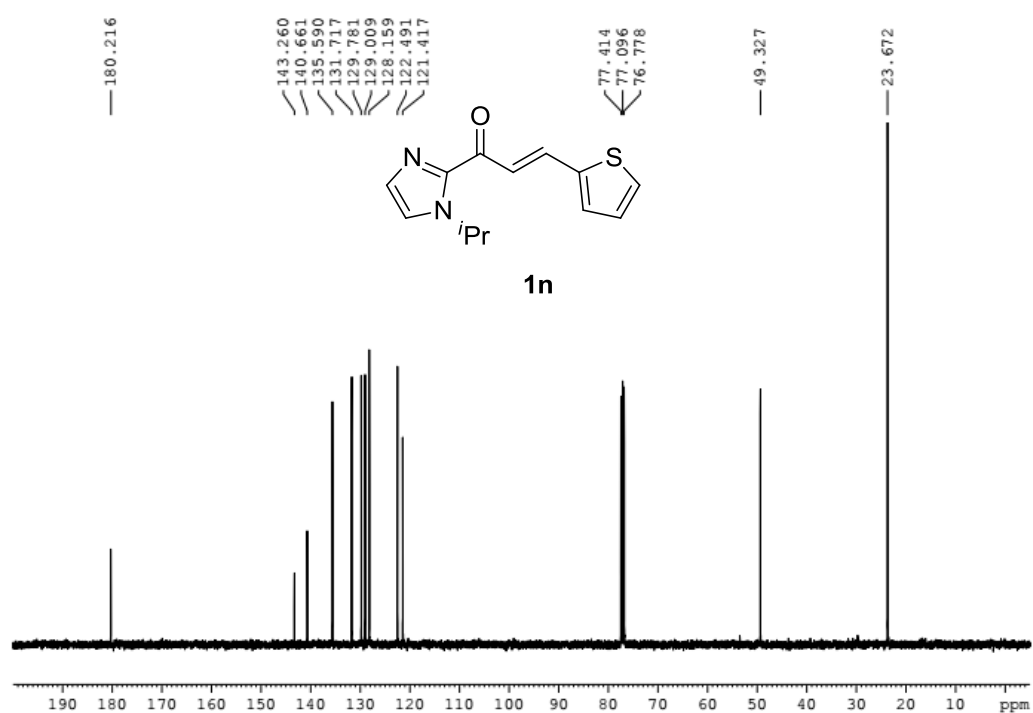

<sup>1</sup>H NMR (400 MHz) and <sup>13</sup>C NMR (100 MHz) spectra of **1n**

## VII NMR Spectra of Products

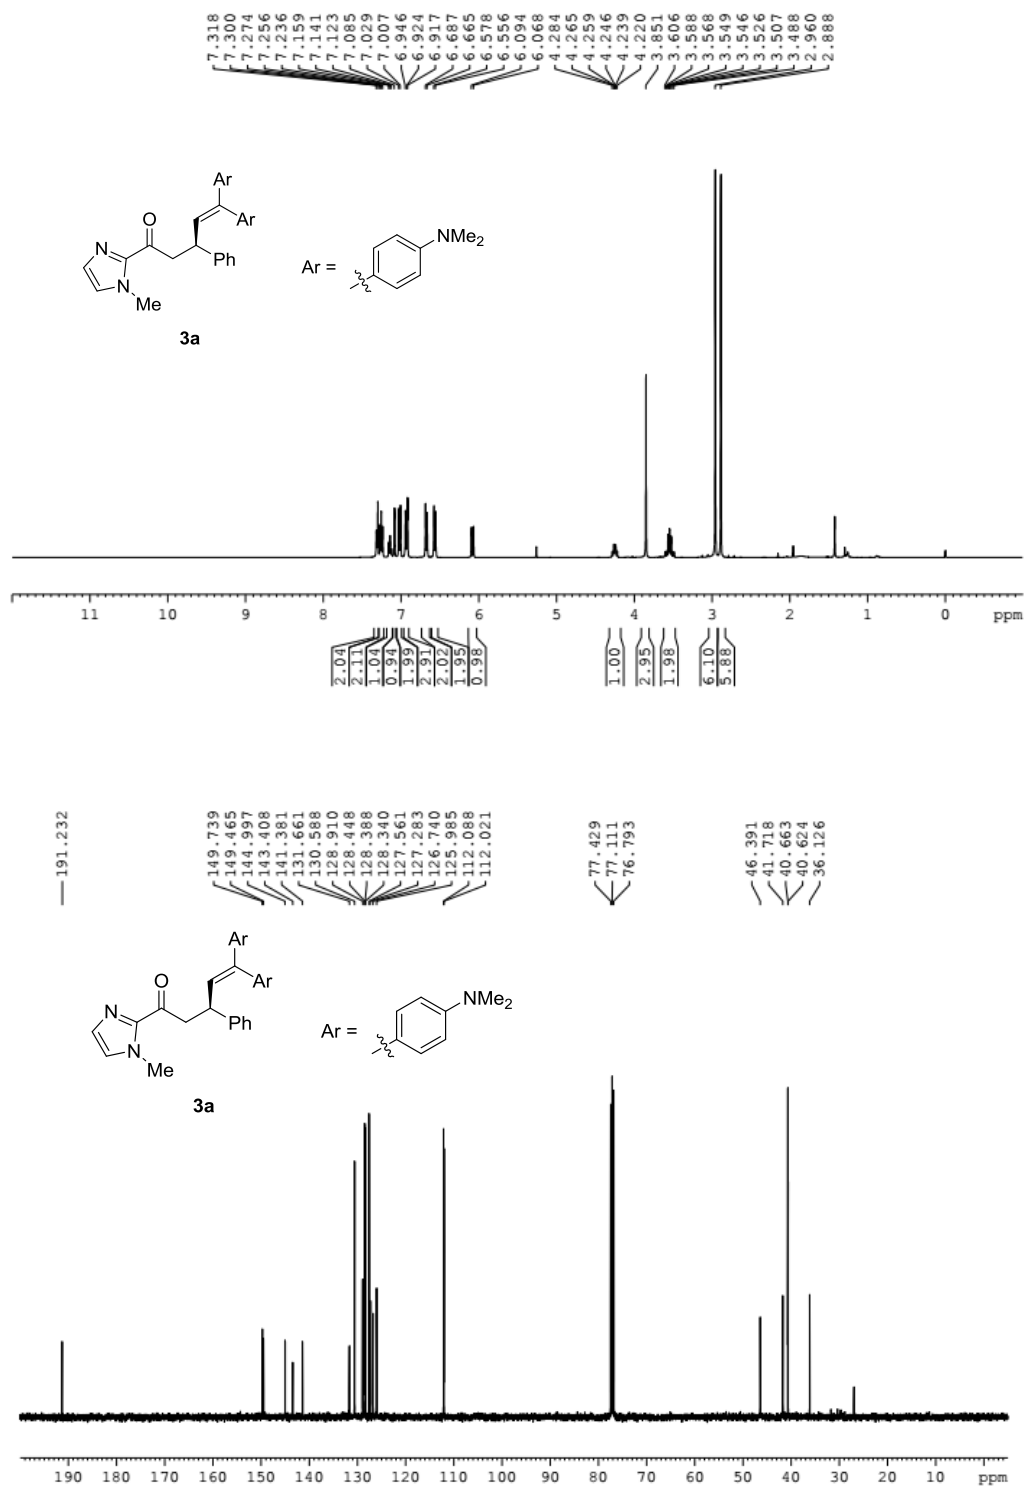

<sup>1</sup>H NMR (400 MHz) and <sup>13</sup>C NMR (100 MHz) spectra of **3a**



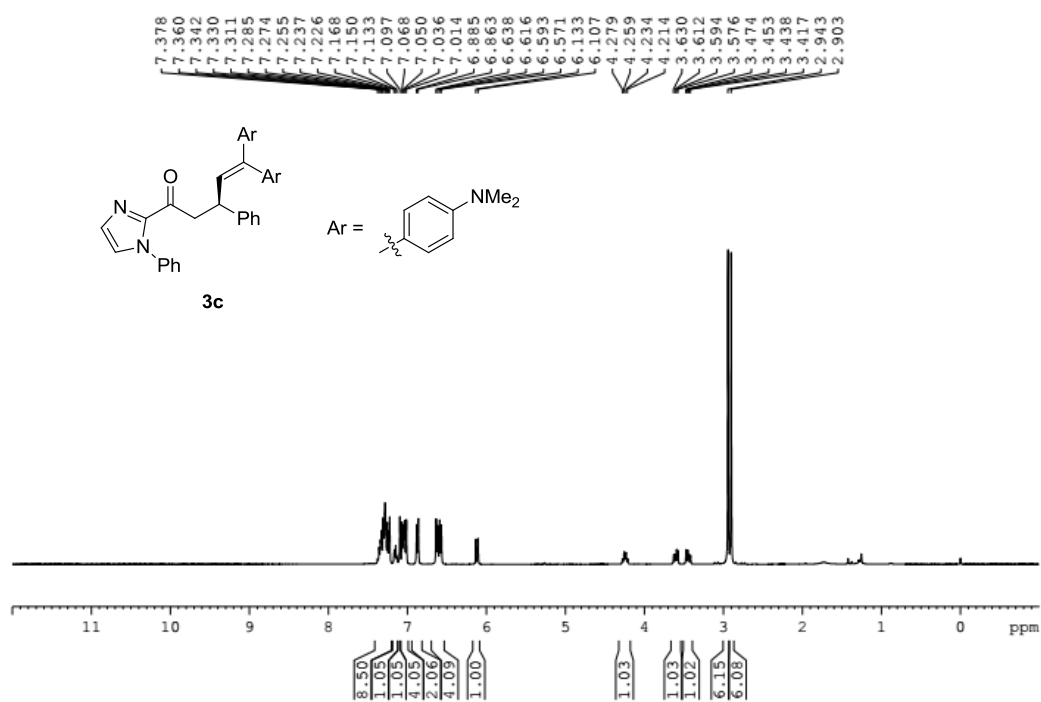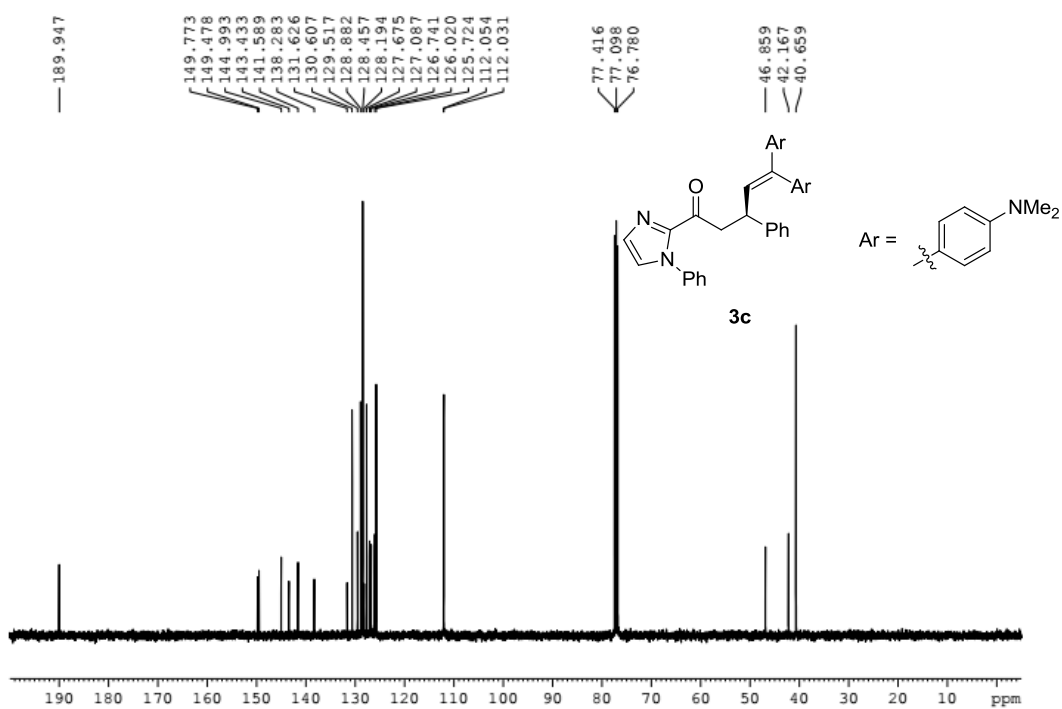

<sup>1</sup>H NMR (400 MHz) and <sup>13</sup>C NMR (100 MHz) spectra of **3c**

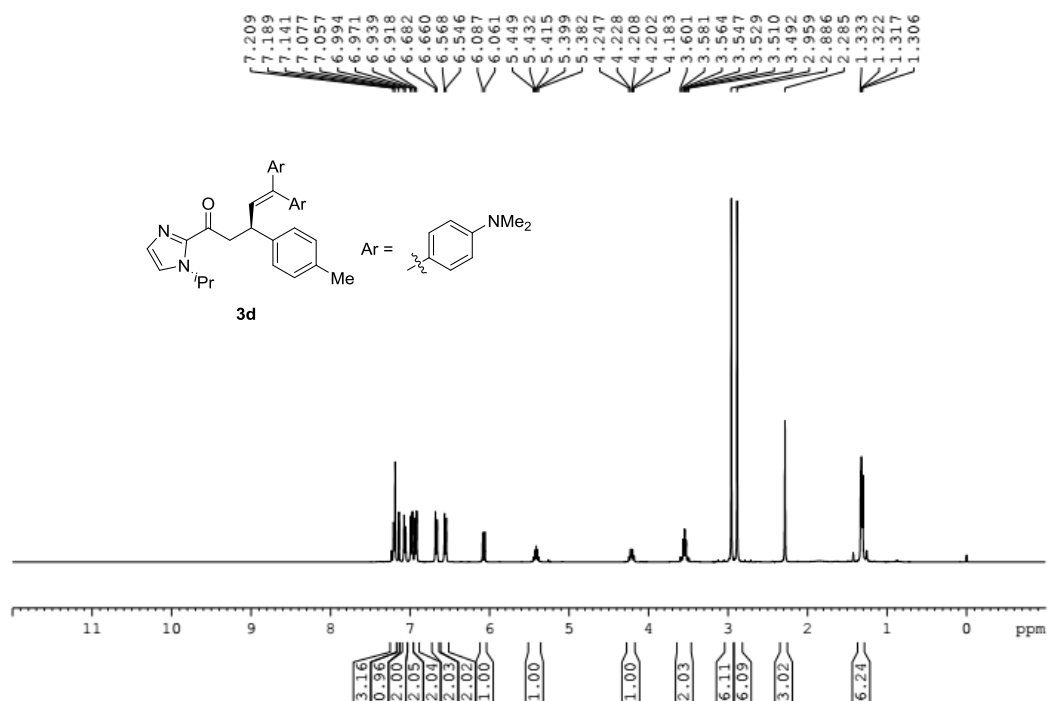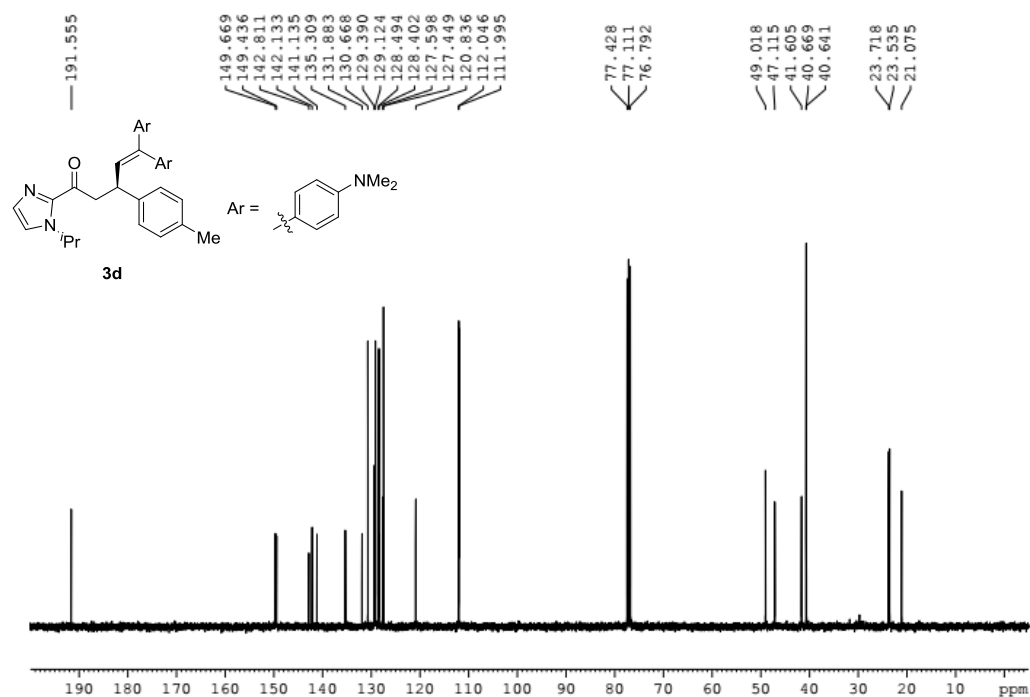

<sup>1</sup>H NMR (400 MHz) and <sup>13</sup>C NMR (100 MHz) spectra of **3d**

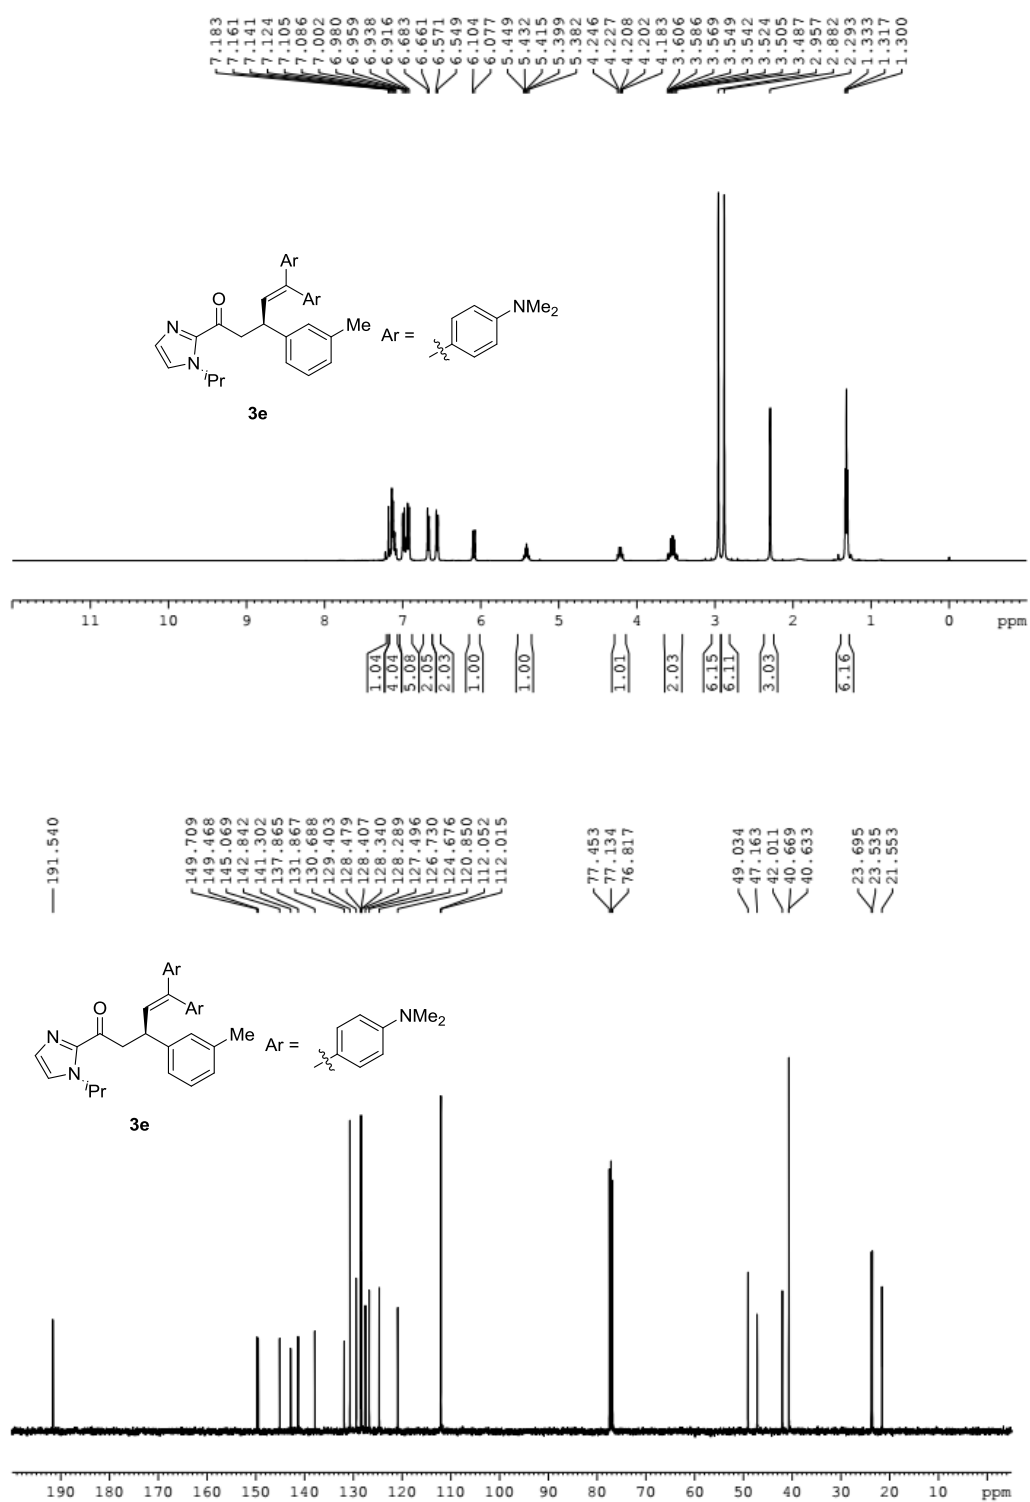

<sup>1</sup>H NMR (400 MHz) and <sup>13</sup>C NMR (100 MHz) spectra of **3e**

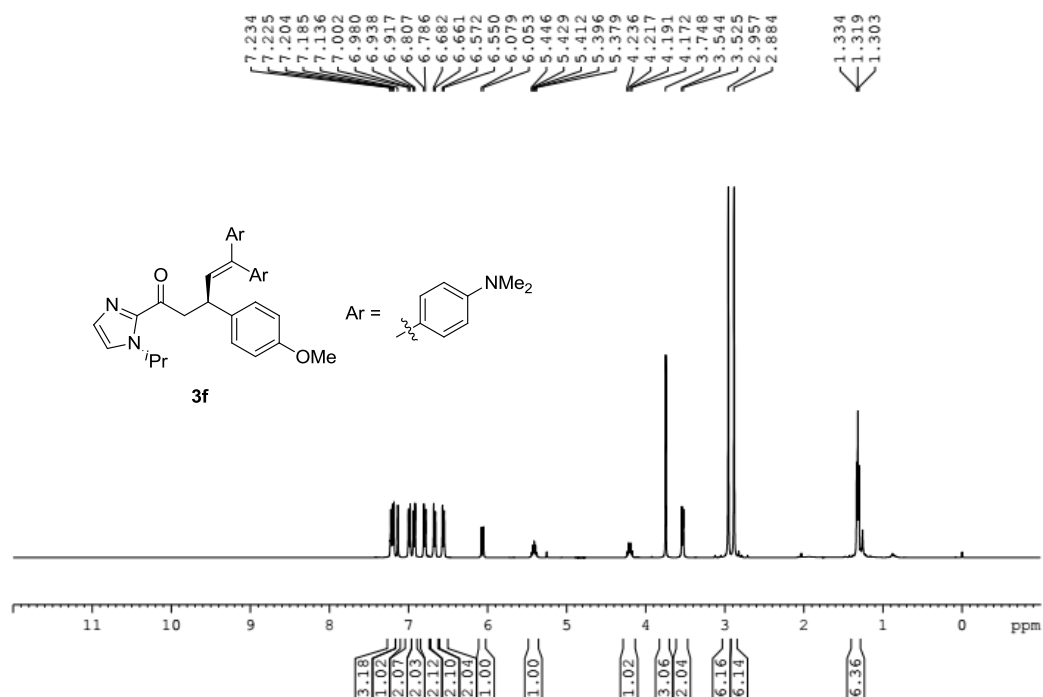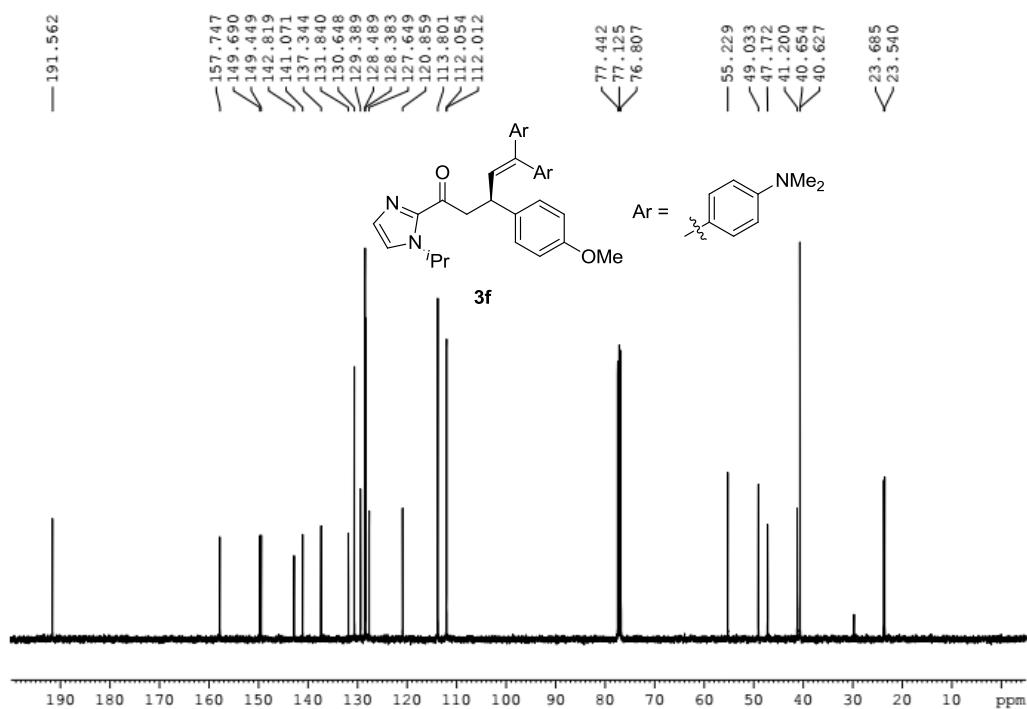

<sup>1</sup>H NMR (400 MHz) and <sup>13</sup>C NMR (100 MHz) spectra of **3f**



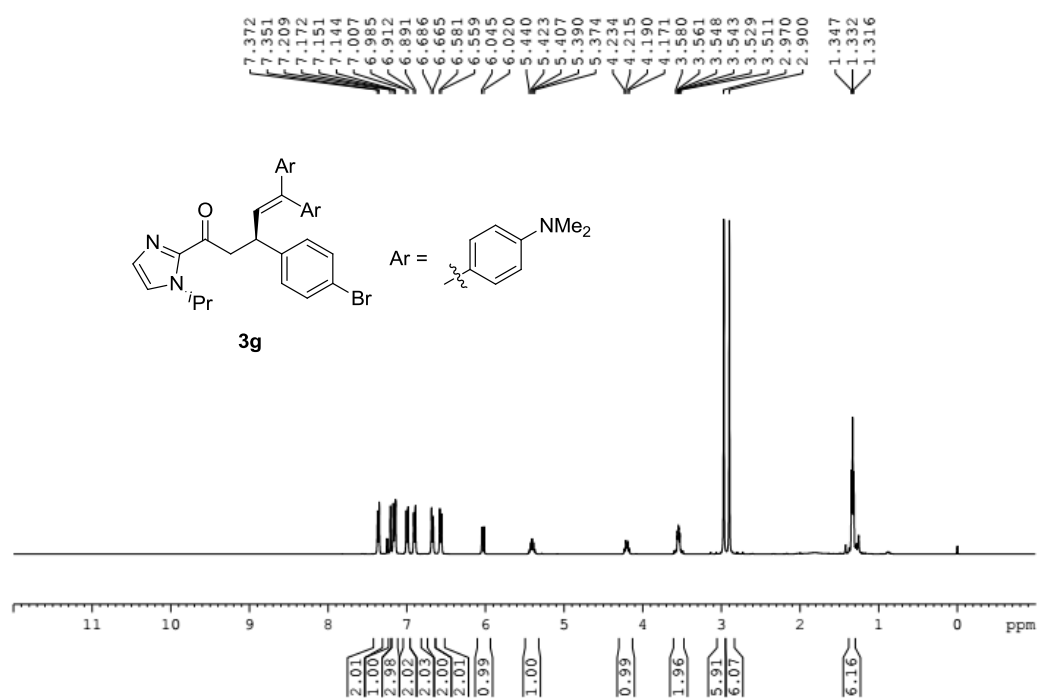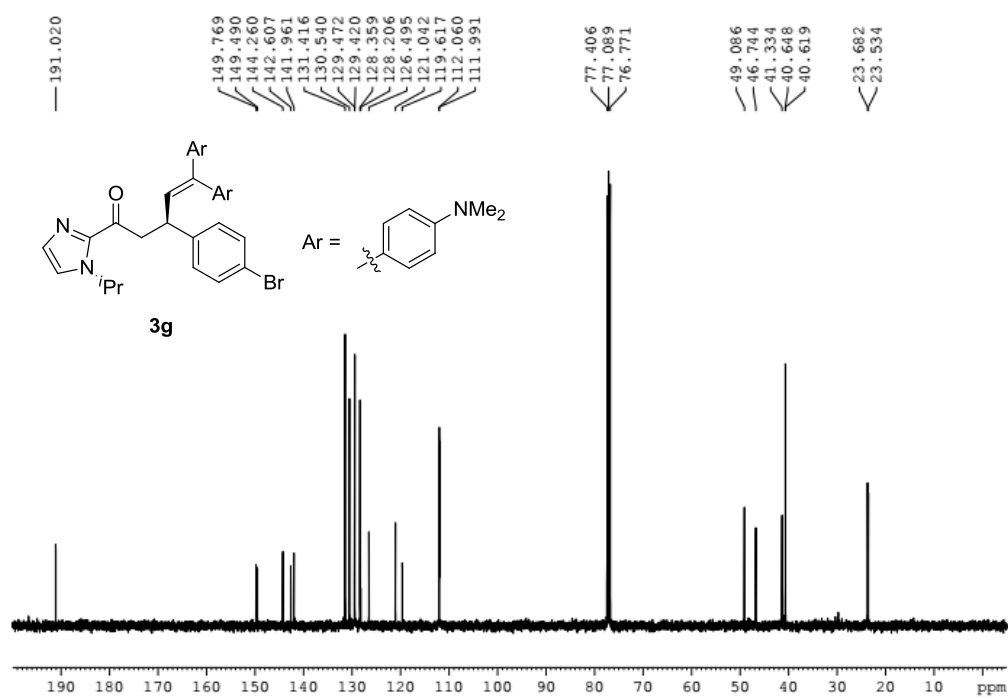

<sup>1</sup>H NMR (400 MHz) and <sup>13</sup>C NMR (100 MHz) spectra of **3g**

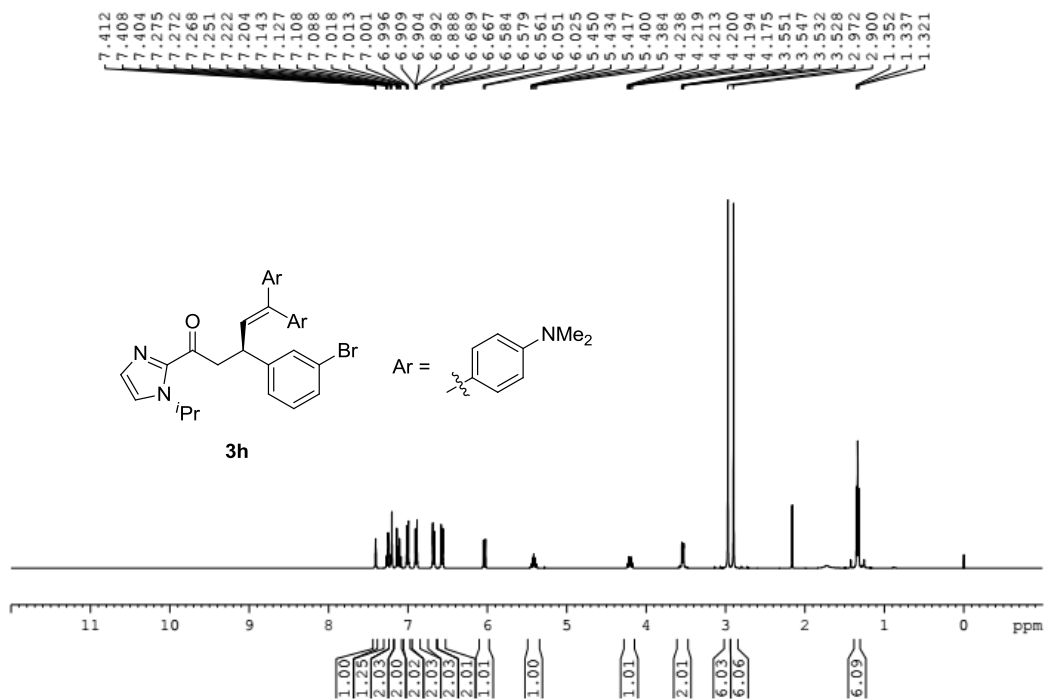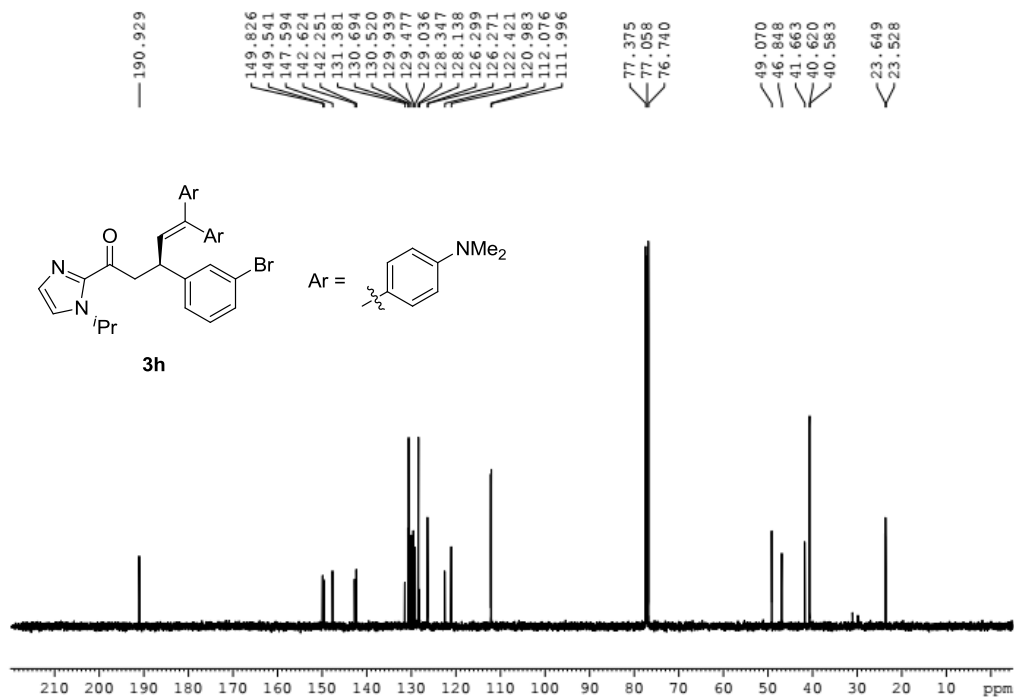

<sup>1</sup>H NMR (400 MHz) and <sup>13</sup>C NMR (100 MHz) spectra of **3h**

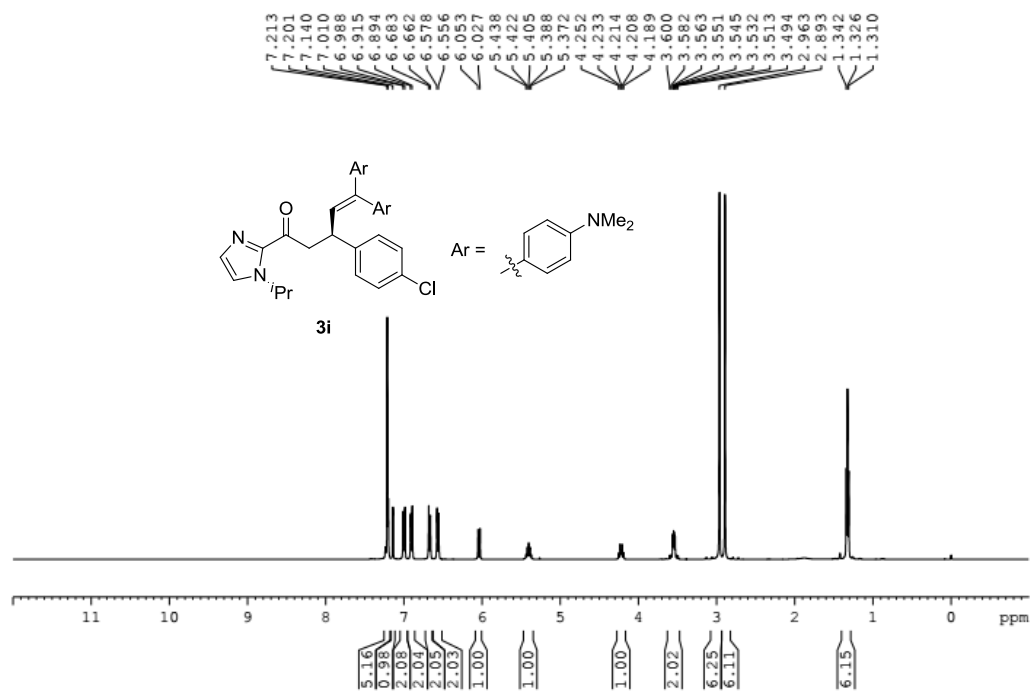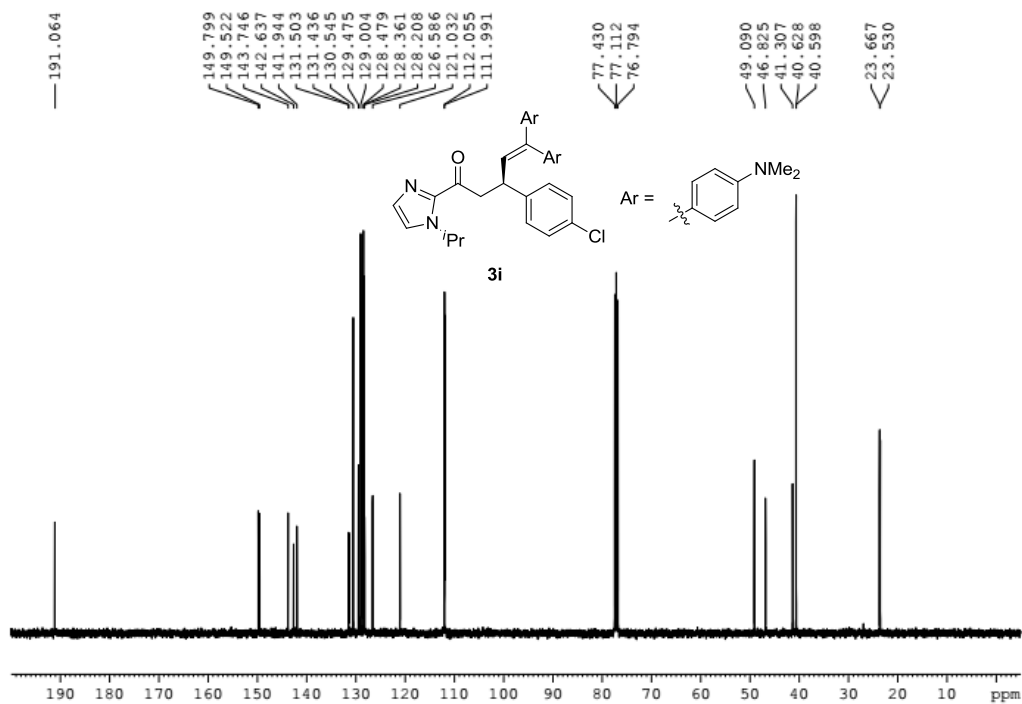

<sup>1</sup>H NMR (400 MHz) and <sup>13</sup>C NMR (100 MHz) spectra of **3i**

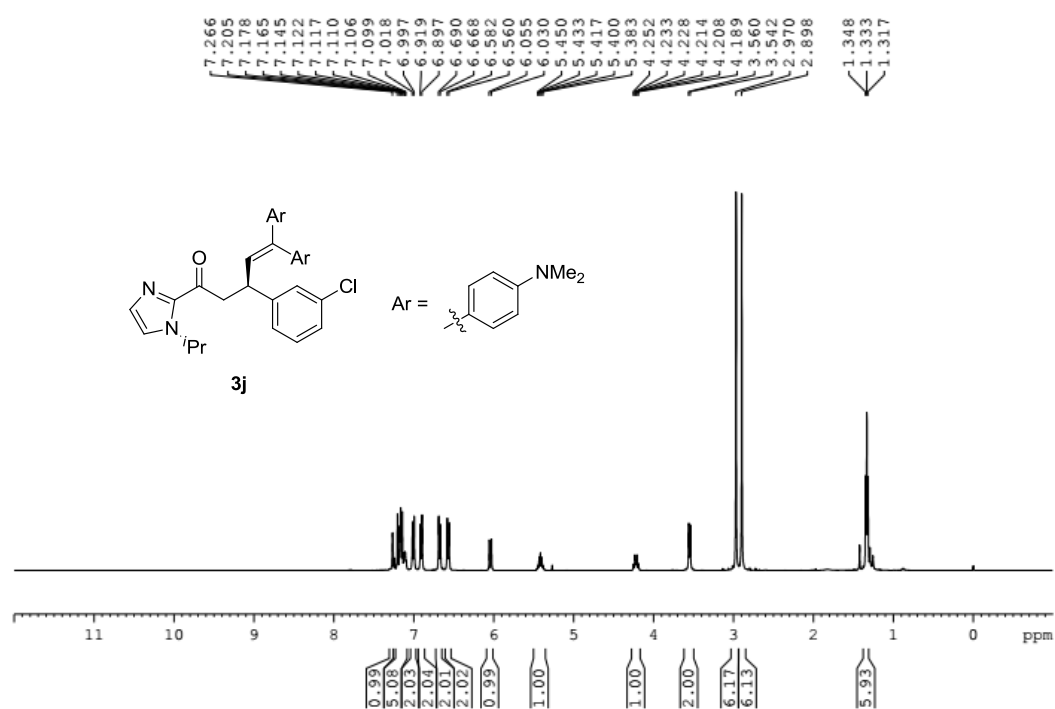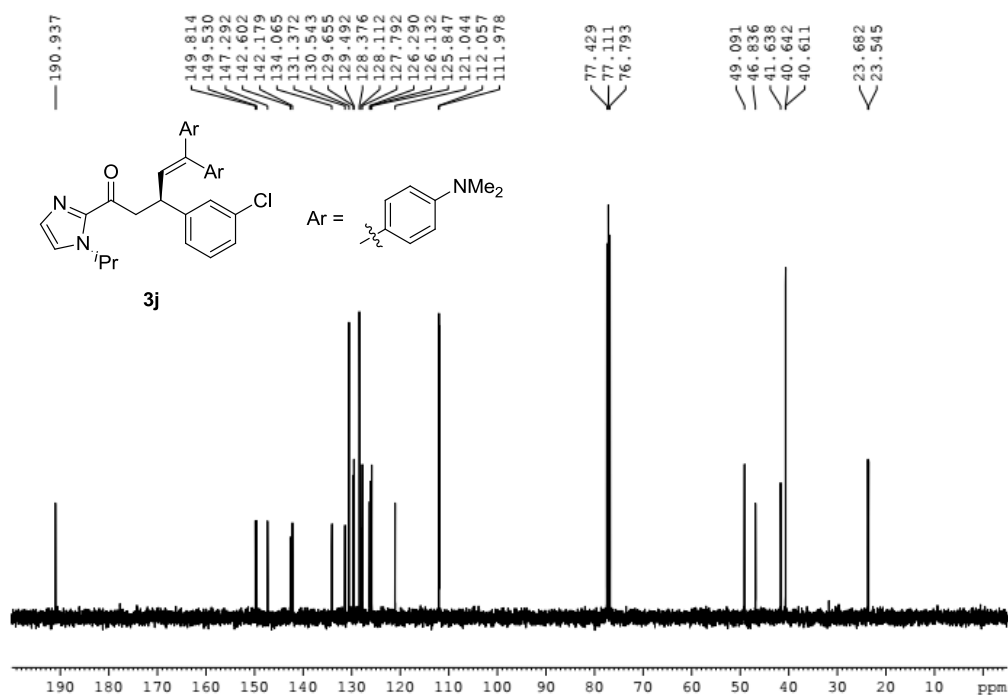

<sup>1</sup>H NMR (400 MHz) and <sup>13</sup>C NMR (100 MHz) spectra of 3j

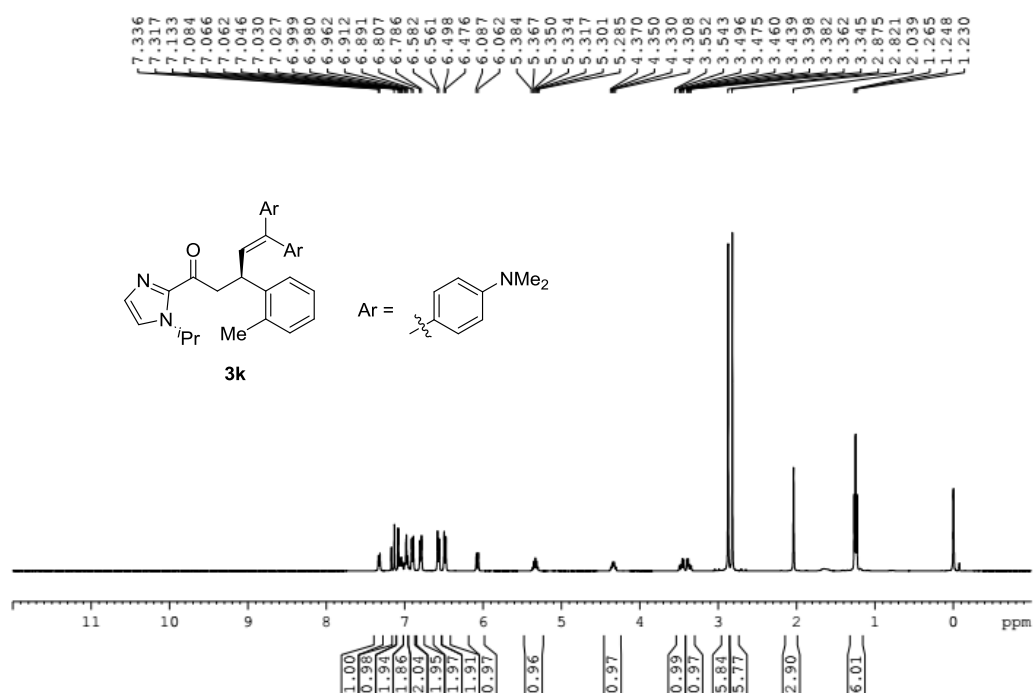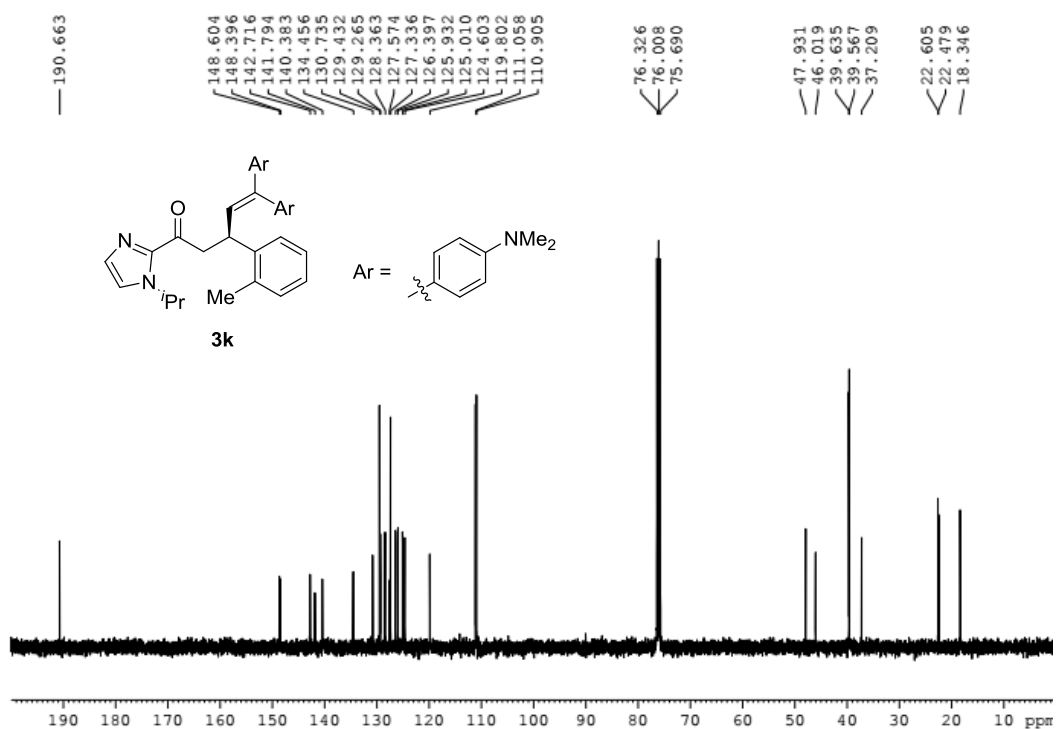

<sup>1</sup>H NMR (400 MHz) and <sup>13</sup>C NMR (100 MHz) spectra of **3k**

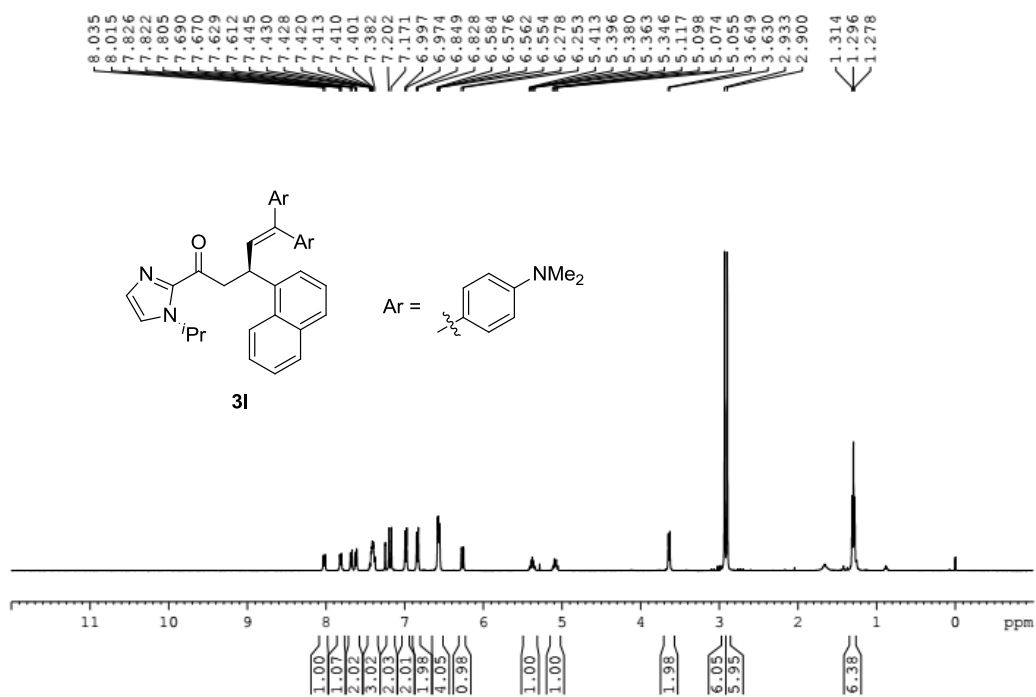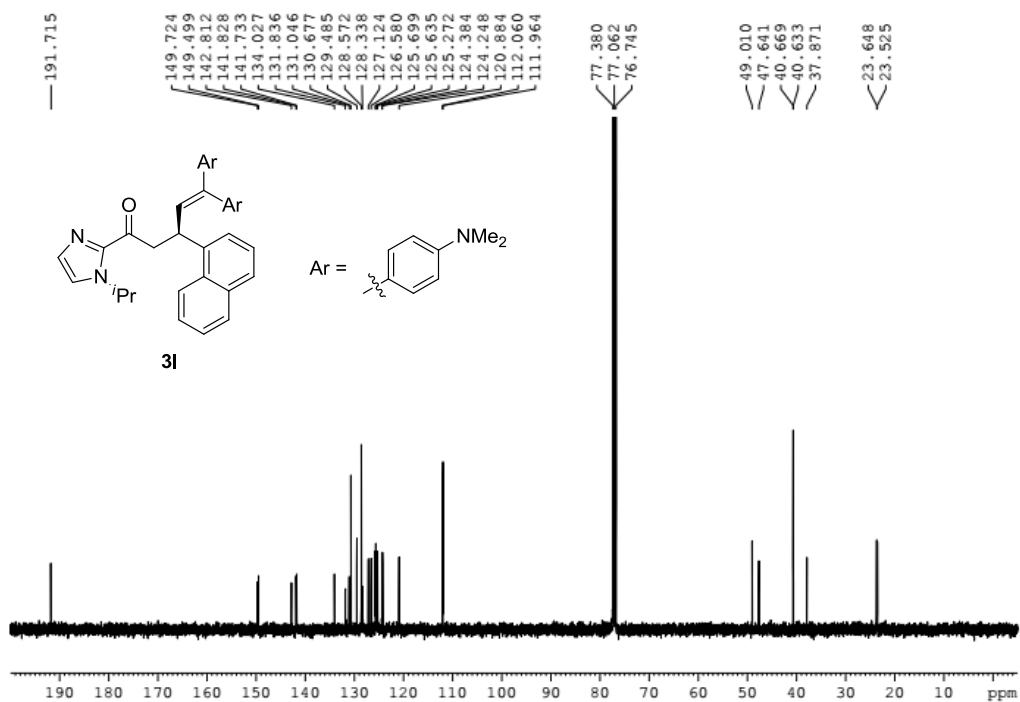

<sup>1</sup>H NMR (400 MHz) and <sup>13</sup>C NMR (100 MHz) spectra of **3l**



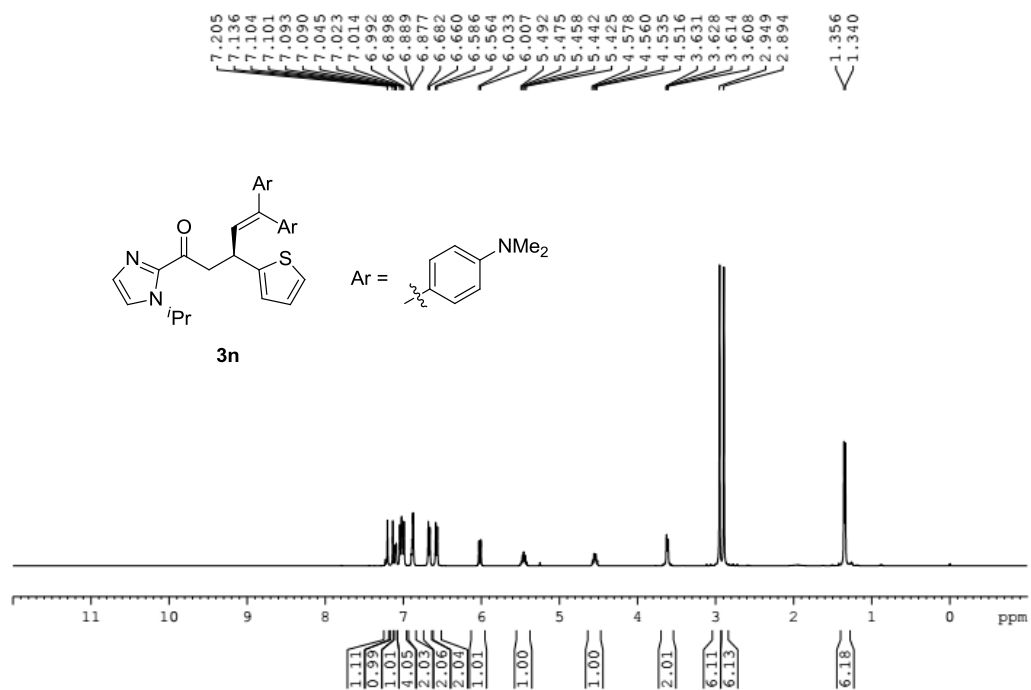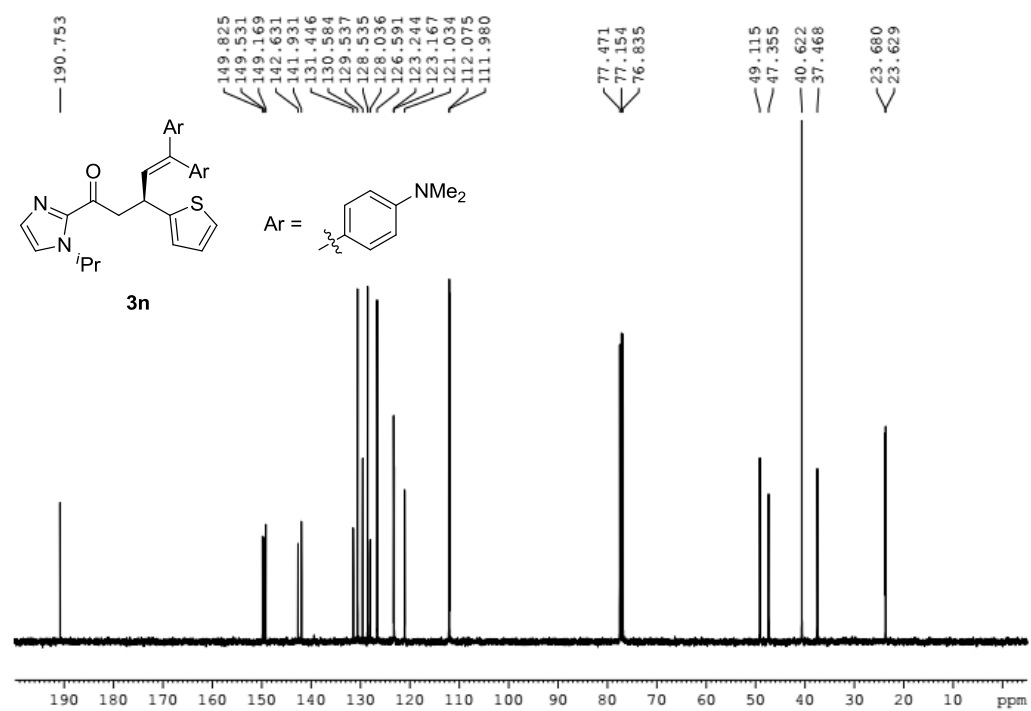

<sup>1</sup>H NMR (400 MHz) and <sup>13</sup>C NMR (100 MHz) spectra of **3n**



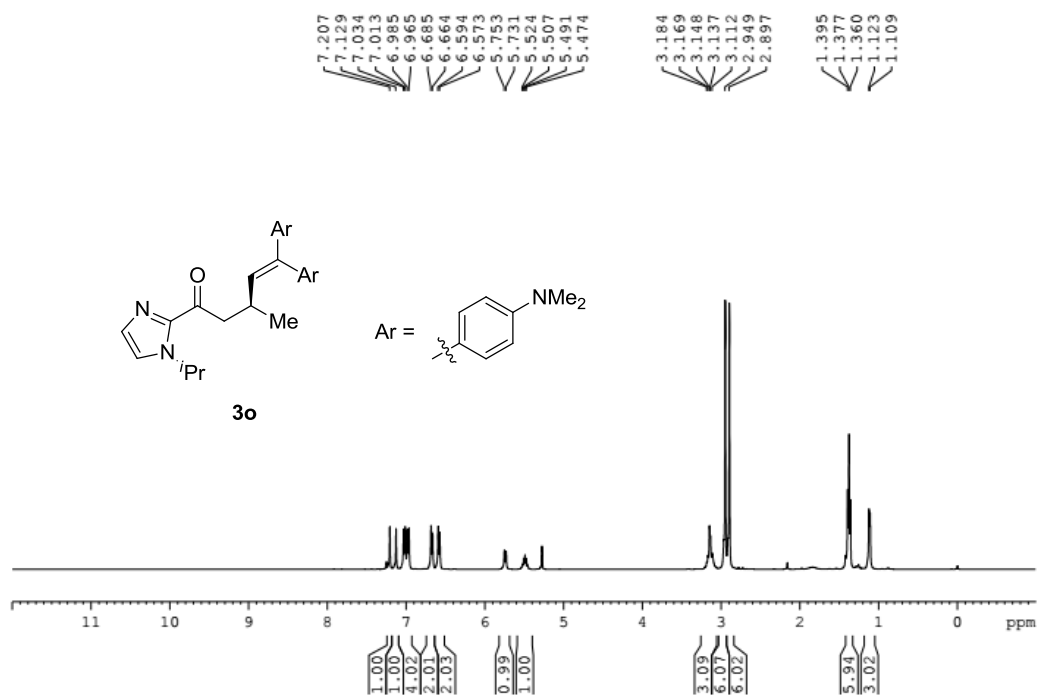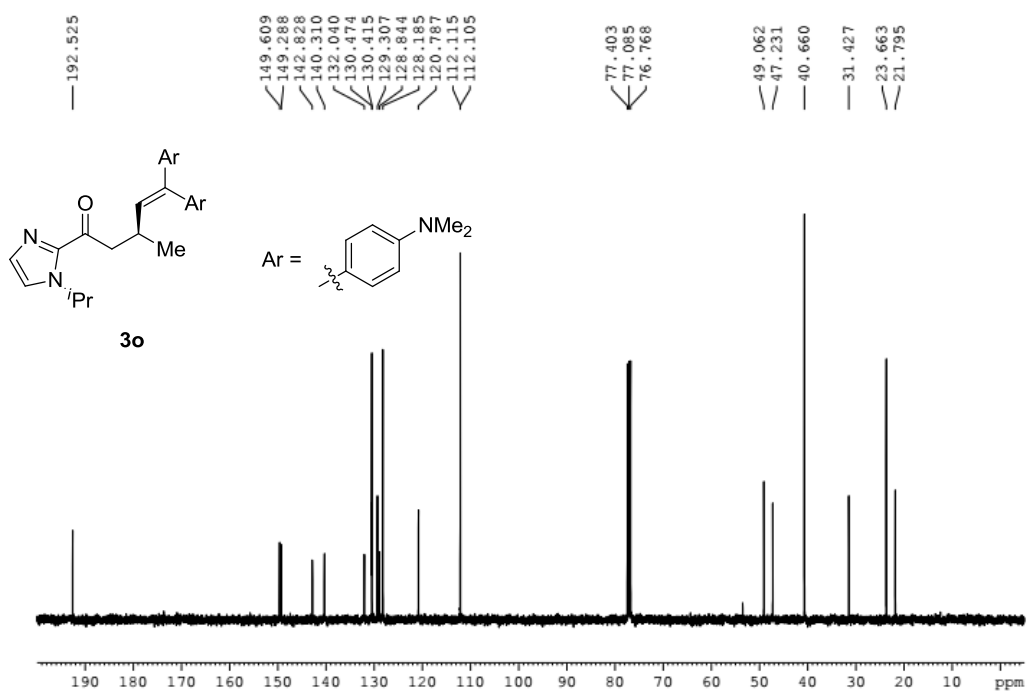

<sup>1</sup>H NMR (400 MHz) and <sup>13</sup>C NMR (100 MHz) spectra of **3o**

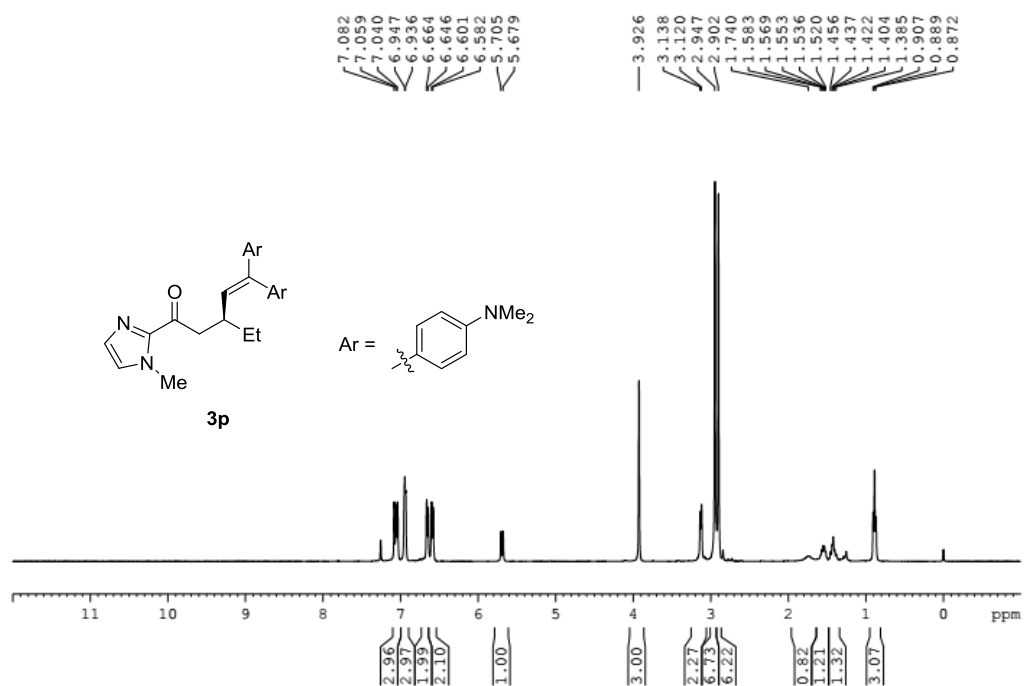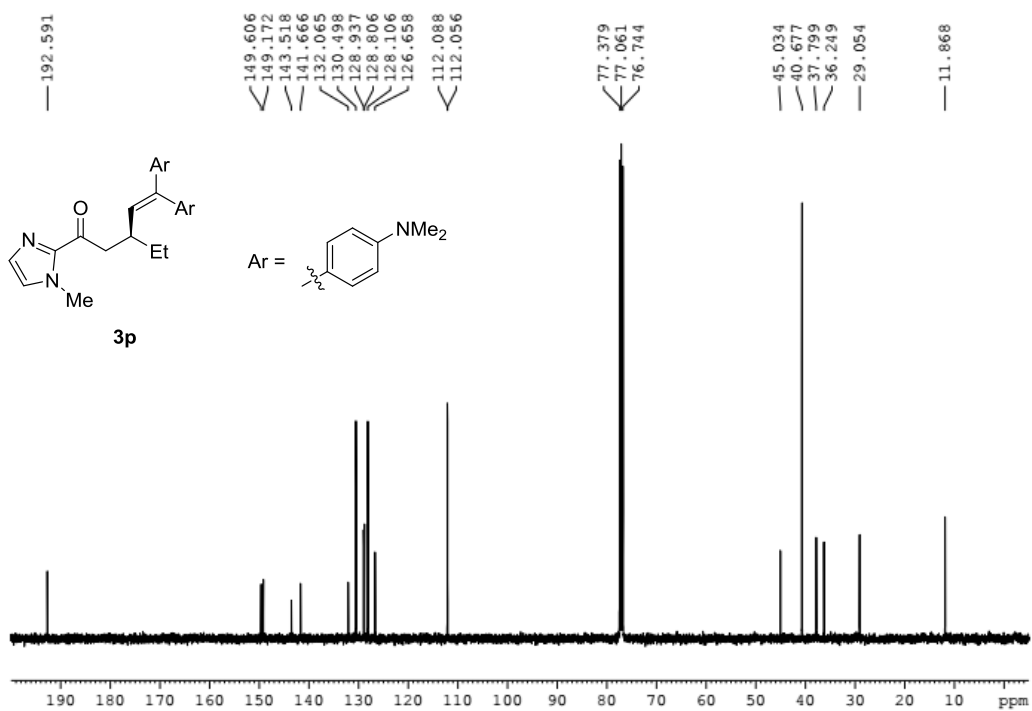

<sup>1</sup>H NMR (400 MHz) and <sup>13</sup>C NMR (100 MHz) spectra of **3p**

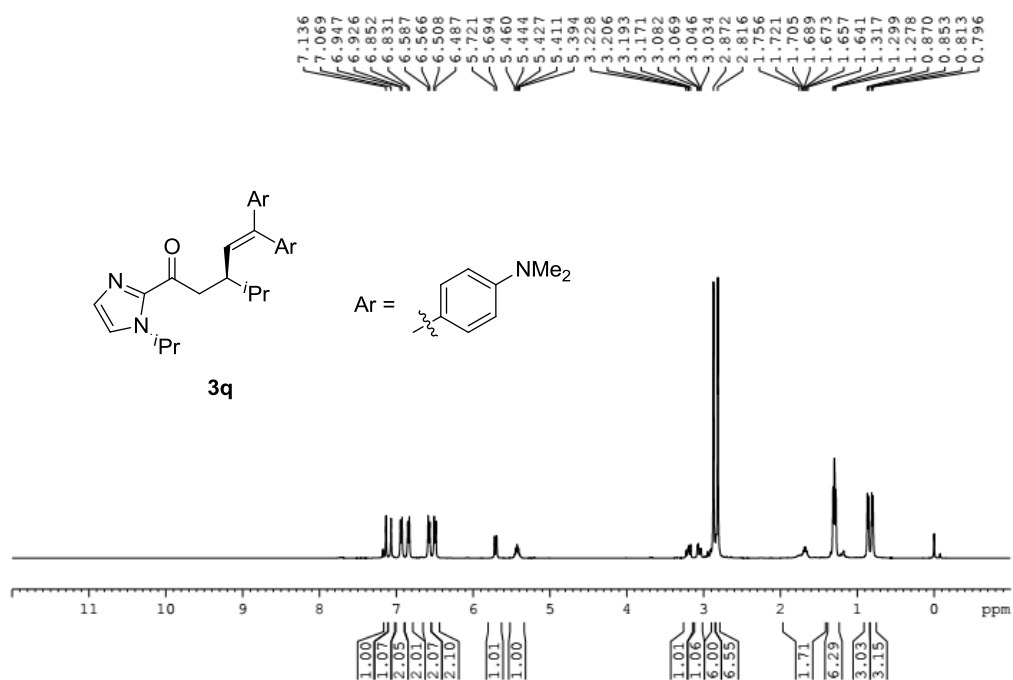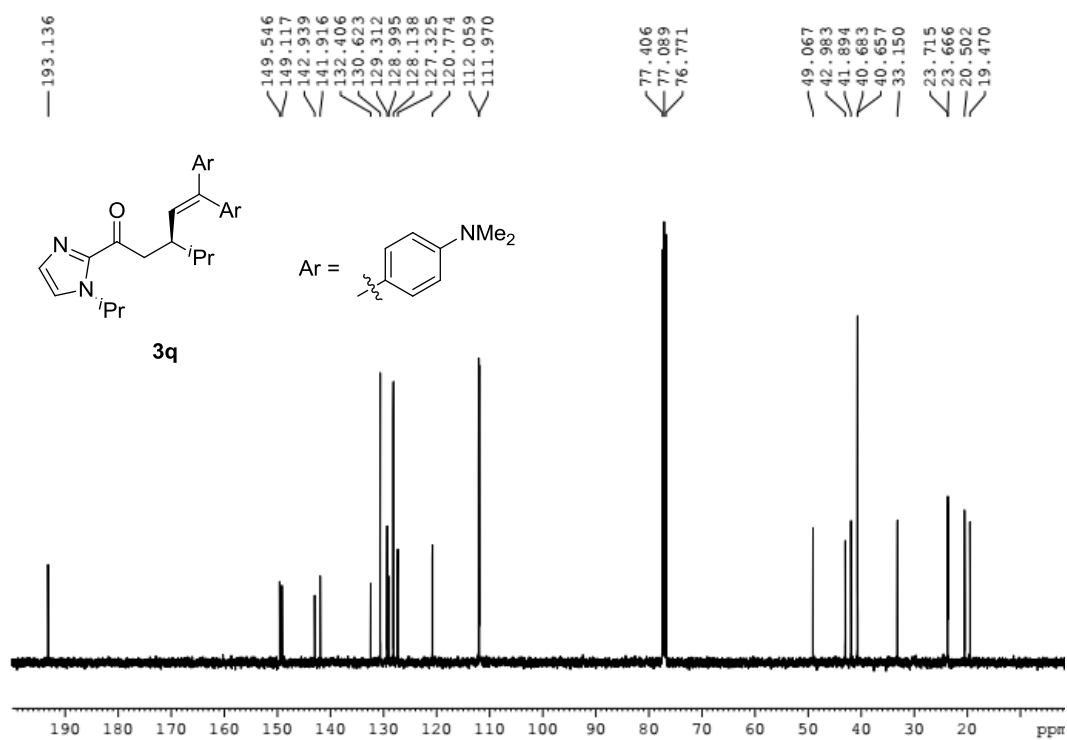

<sup>1</sup>H NMR (400 MHz) and <sup>13</sup>C NMR (100 MHz) spectra of **3q**

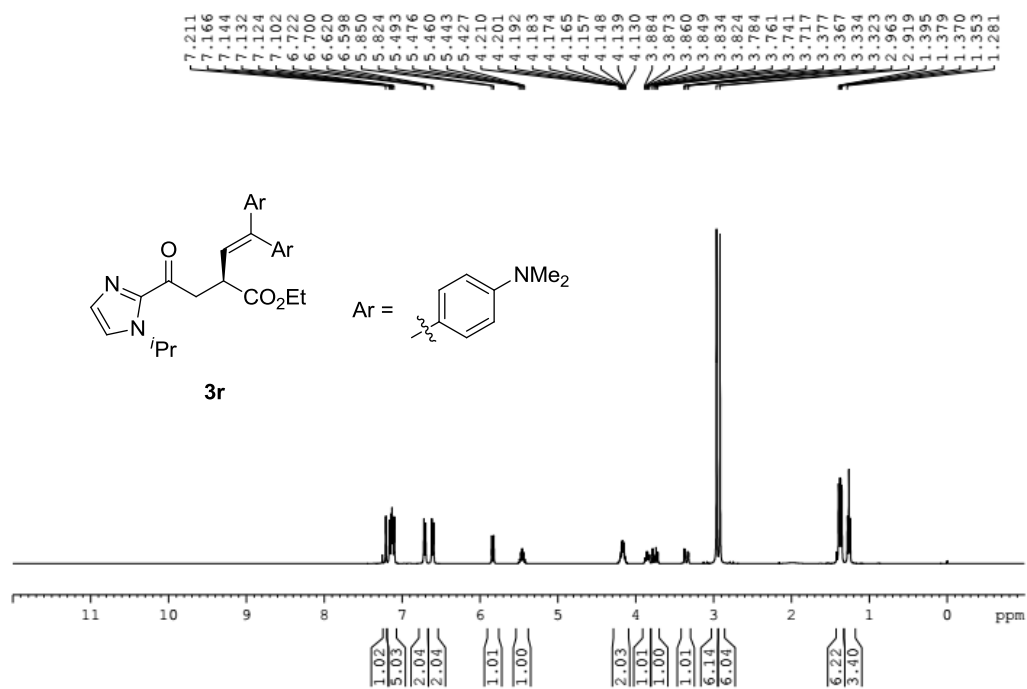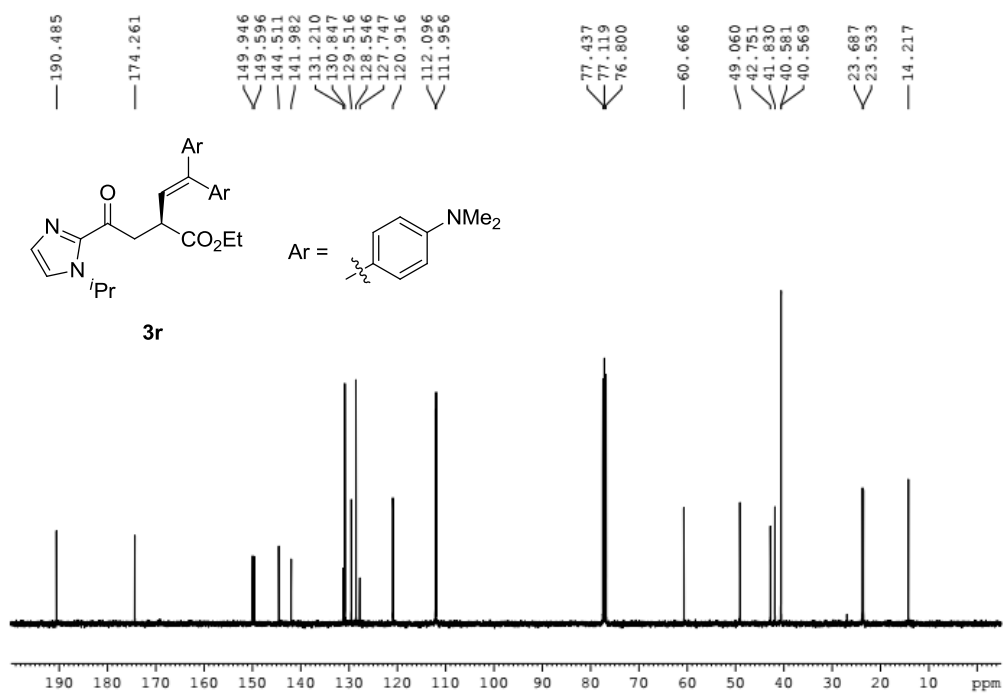

<sup>1</sup>H NMR (400 MHz) and <sup>13</sup>C NMR (100 MHz) spectra of **3r**

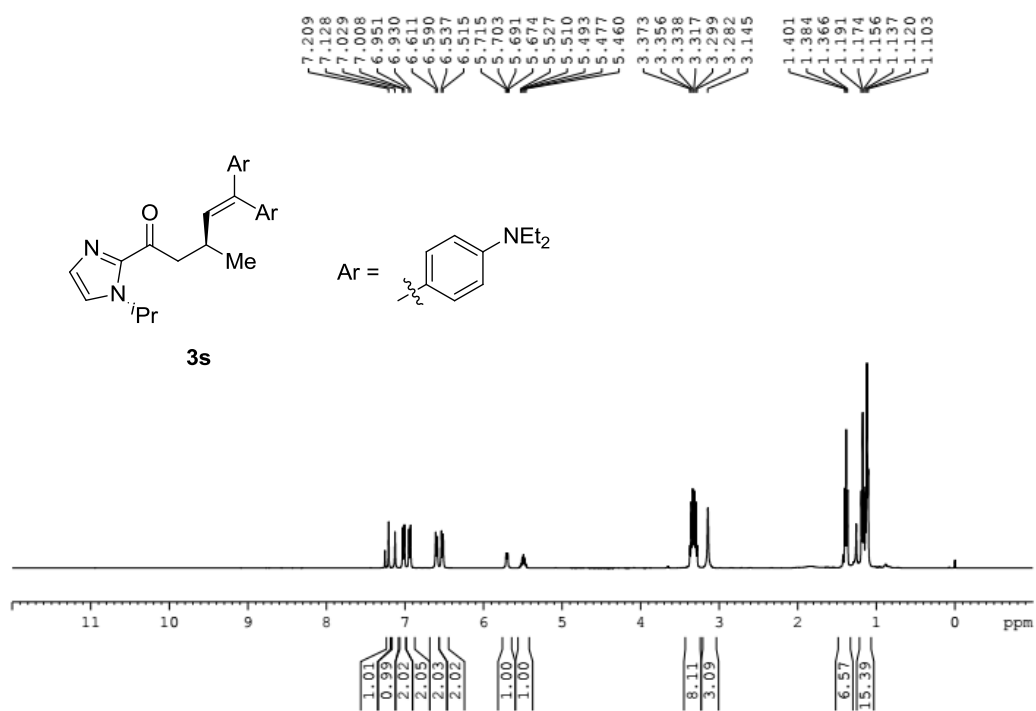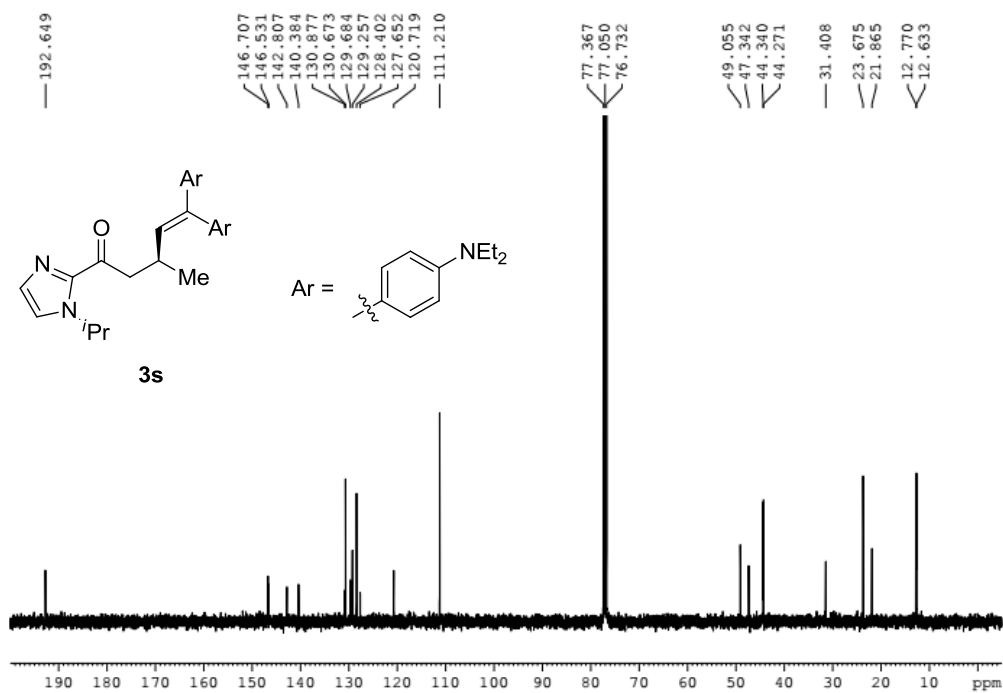

<sup>1</sup>H NMR (400 MHz) and <sup>13</sup>C NMR (100 MHz) spectra of **3s**

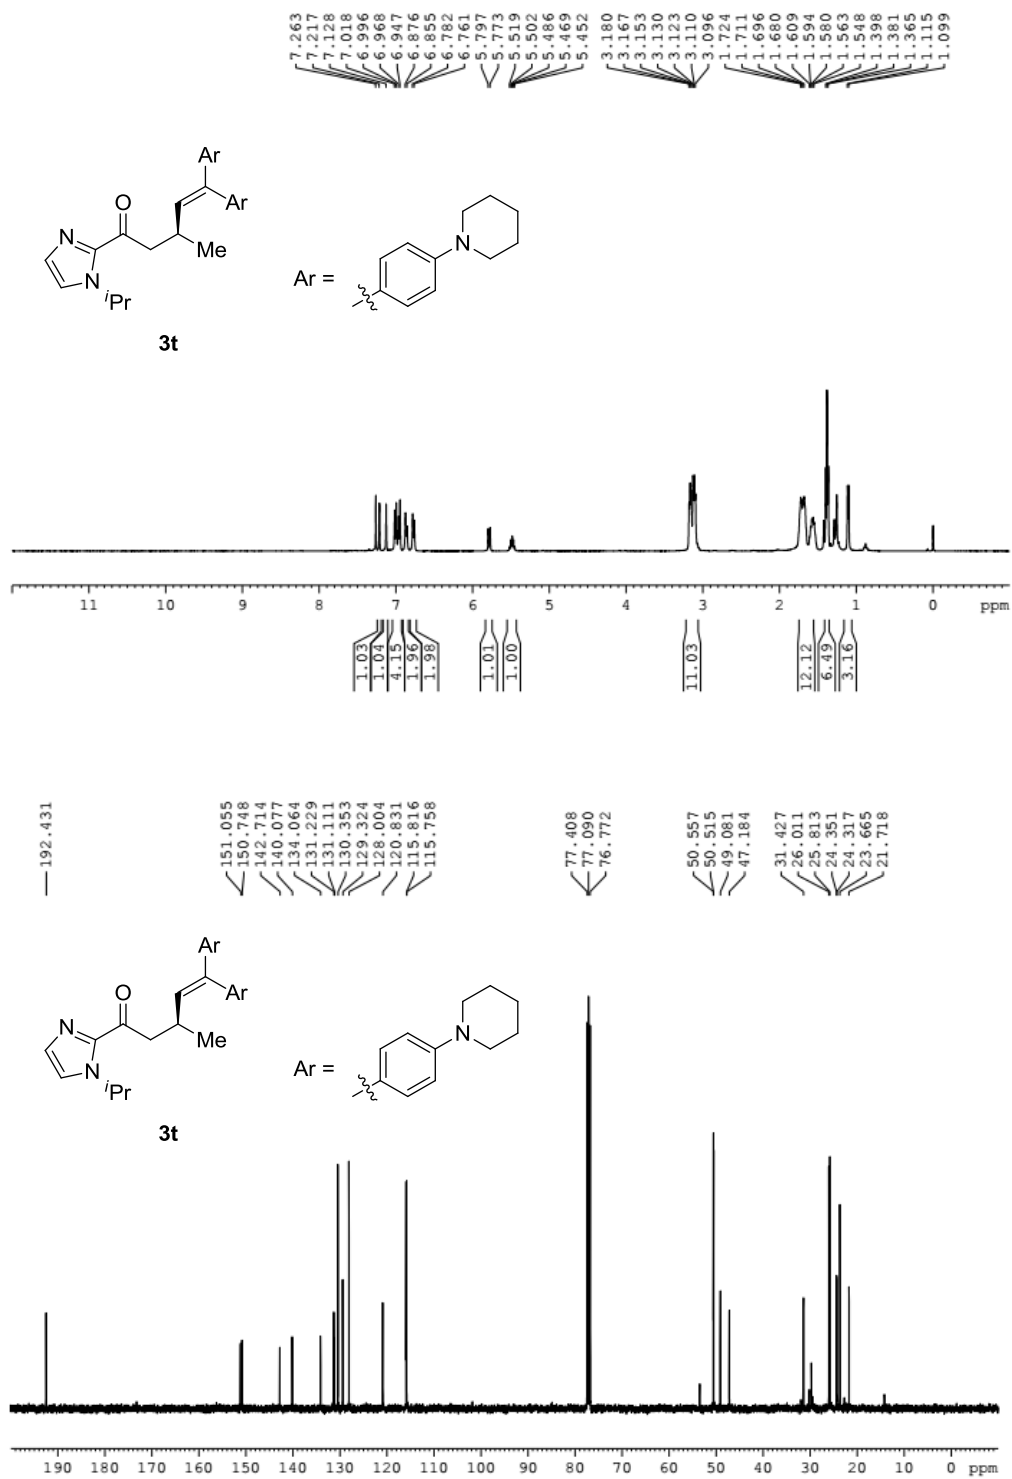

<sup>1</sup>H NMR (400 MHz) and <sup>13</sup>C NMR (100 MHz) spectra of **3t**

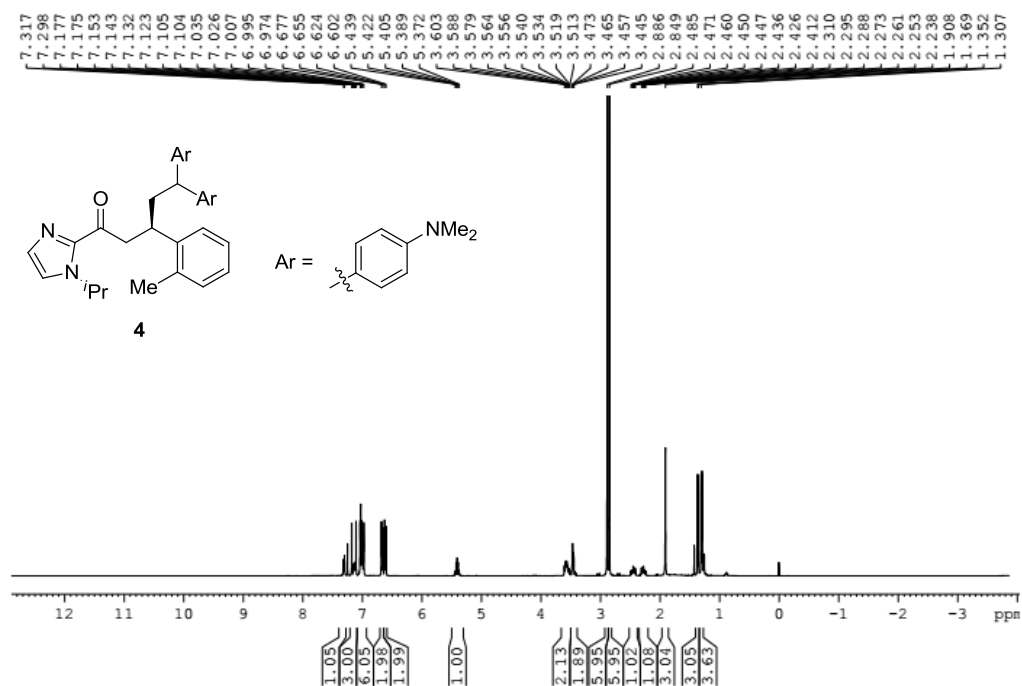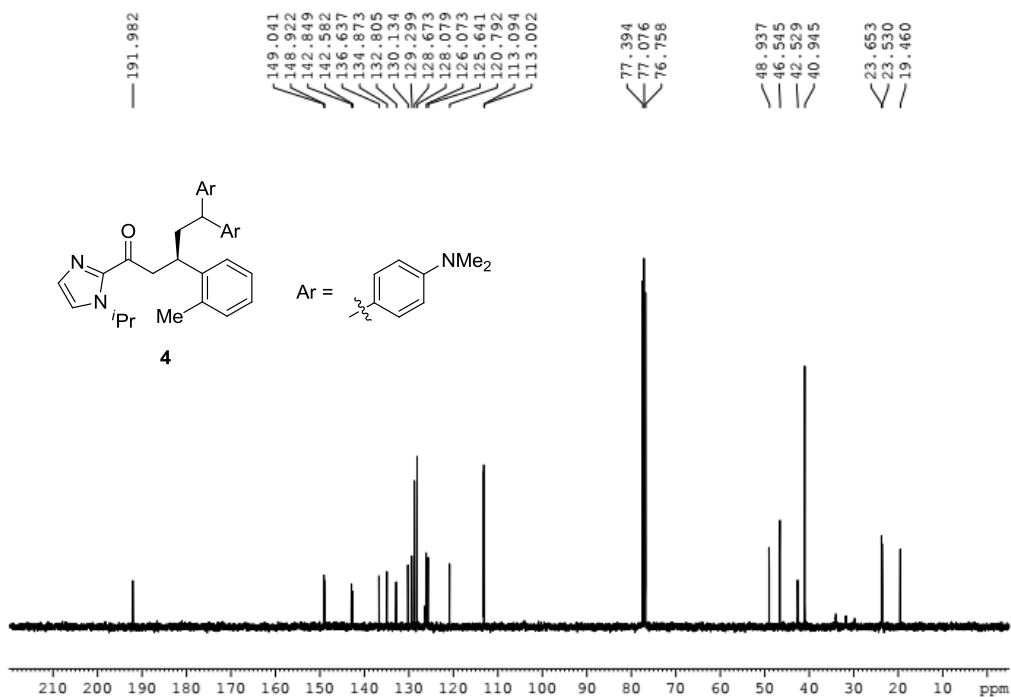

<sup>1</sup>H NMR (400 MHz) and <sup>13</sup>C NMR (100 MHz) spectra of 4

## VI Single Crystal X-Ray Diffraction of **3k**

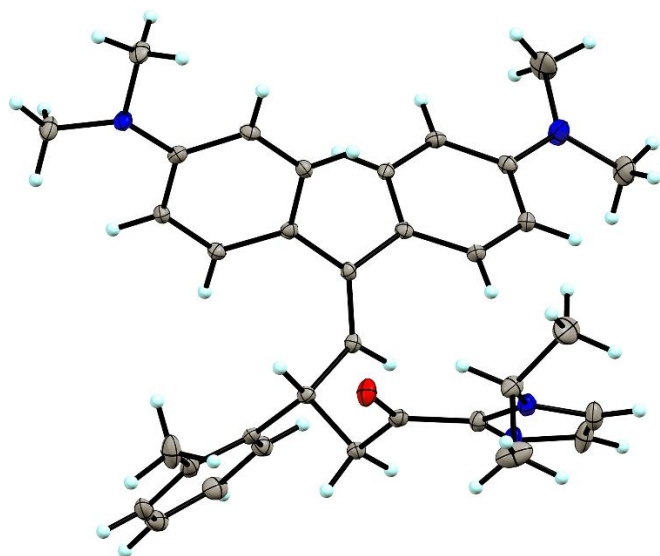

**Figure 1.** X-ray derived ORTEP of **3k** with thermal ellipsoids shown at the 35% probability level

Table 1. Crystal data and structure refinement for data.

|                                 |                                                  |          |
|---------------------------------|--------------------------------------------------|----------|
| Identification code             | <b>3k</b>                                        |          |
| Empirical formula               | C <sub>34</sub> H <sub>40</sub> N <sub>4</sub> O |          |
| Formula weight                  | 520.70                                           |          |
| Temperature                     | 100.0(3) K                                       |          |
| Wavelength                      | 1.54184 Å                                        |          |
| Crystal system                  | Orthorhombic                                     |          |
| Space group                     | P 21 21 21                                       |          |
| Unit cell dimensions            | a = 9.59380(10) Å                                | α = 90°. |
|                                 | b = 12.2141(2) Å                                 | β = 90°. |
|                                 | c = 24.9699(4) Å                                 | γ = 90°. |
| Volume                          | 2925.96(7) Å <sup>3</sup>                        |          |
| Z                               | 4                                                |          |
| Density (calculated)            | 1.182 Mg/m <sup>3</sup>                          |          |
| Absorption coefficient          | 0.558 mm <sup>-1</sup>                           |          |
| F(000)                          | 1120                                             |          |
| Crystal size                    | 0.160 x 0.150 x 0.120 mm <sup>3</sup>            |          |
| Theta range for data collection | 3.540 to 73.366°.                                |          |



|                                   |                                             |
|-----------------------------------|---------------------------------------------|
| Index ranges                      | -11<=h<=9, -14<=k<=15, -29<=l<=30           |
| Reflections collected             | 12308                                       |
| Independent reflections           | 5479 [R(int) = 0.0227]                      |
| Completeness to theta = 67.684°   | 100.0 %                                     |
| Absorption correction             | Semi-empirical from equivalents             |
| Max. and min. transmission        | 1.00000 and 0.96883                         |
| Refinement method                 | Full-matrix least-squares on F <sup>2</sup> |
| Data / restraints / parameters    | 5479 / 0 / 370                              |
| Goodness-of-fit on F <sup>2</sup> | 1.072                                       |
| Final R indices [I>2sigma(I)]     | R1 = 0.0329, wR2 = 0.0763                   |
| R indices (all data)              | R1 = 0.0376, wR2 = 0.0798                   |
| Absolute structure parameter      | -0.09(13)                                   |
| Extinction coefficient            | n/a                                         |
| Largest diff. peak and hole       | 0.145 and -0.212 e.Å <sup>-3</sup>          |

## VII CD Spectra of $\Lambda$ -Rh3

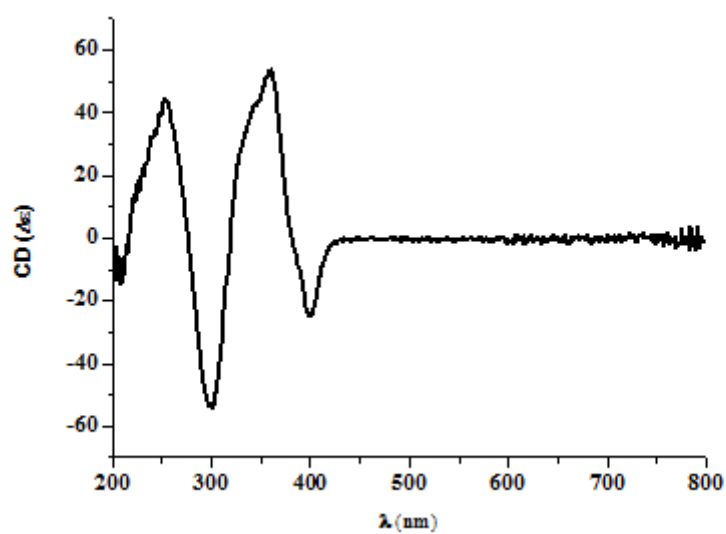

**Figure 1.** CD spectra of  $\Lambda$ -Rh3 recorded in CH<sub>3</sub>OH (0.2 mM)
